# Supplementary material for: Barite oxygen isotope reference materials for highly precise and accurate SIMS microanalysis
Source: Royal Society of Chemistry journal article supplement (doi:10.1039/d3ja00353a), 2024-01-01
Supplement: d3ja00353a1.pdf [file d3ja00353a1.pdf]

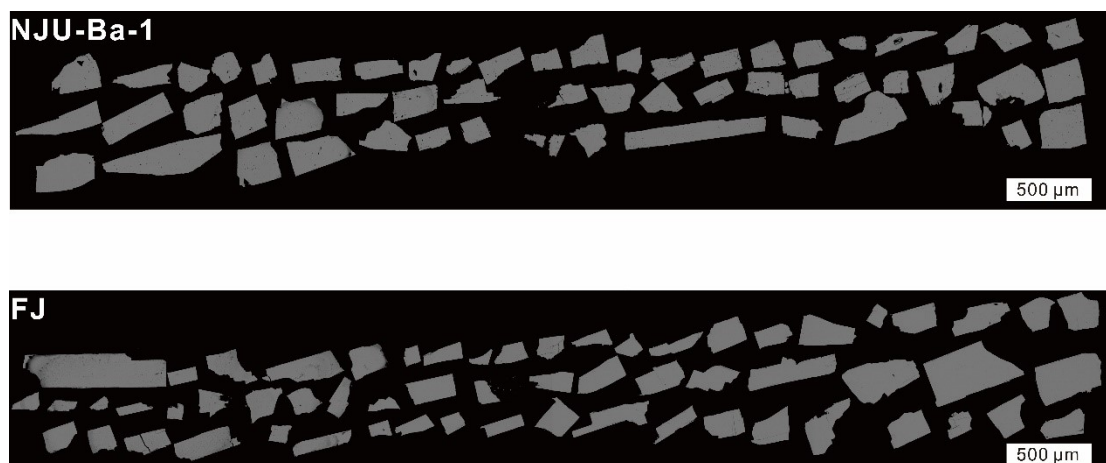

Figure S1. Backscattered electron-imaging result for NJU-Ba-1 and FJ barite. NJU-Ba-1 barite contains small amounts of tiny calcite inclusions, while FJ is nearly pure barite mineral with minimal inclusions.

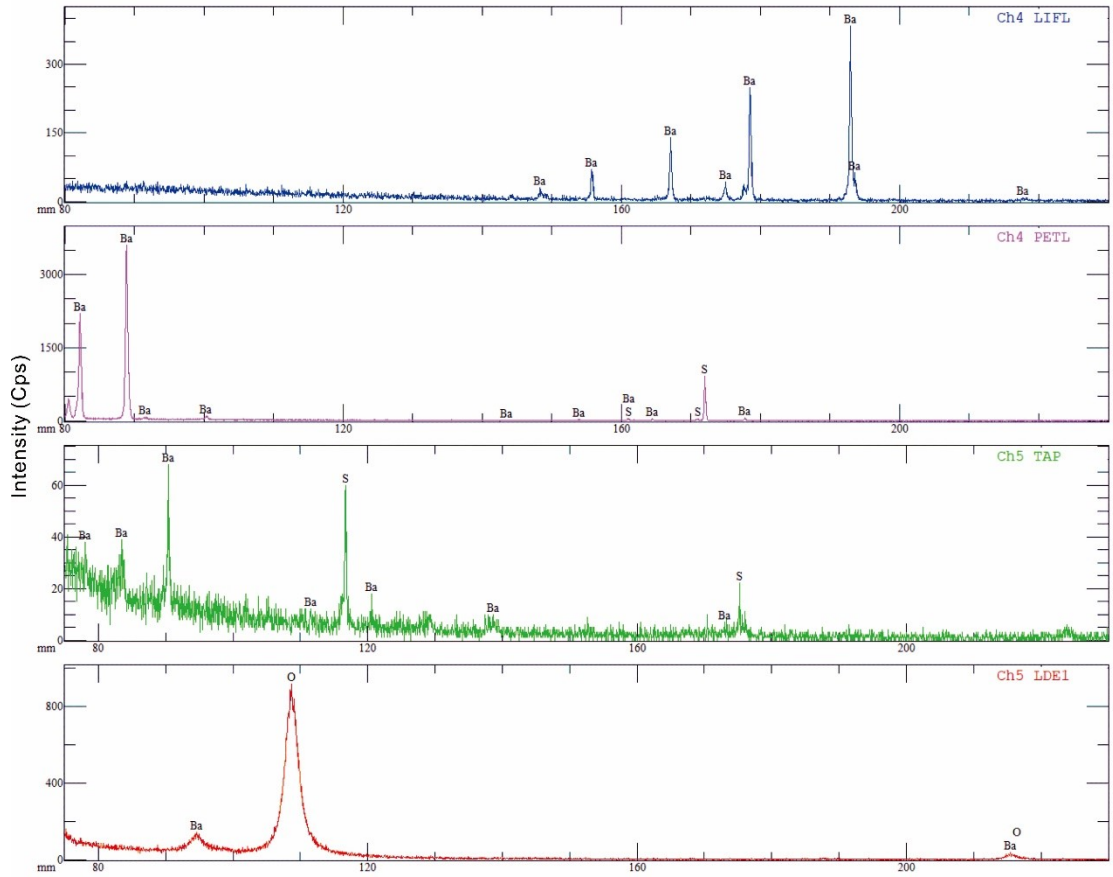

Figure S2. All element scanning wave spectra of NJU-Ba-1 barite.

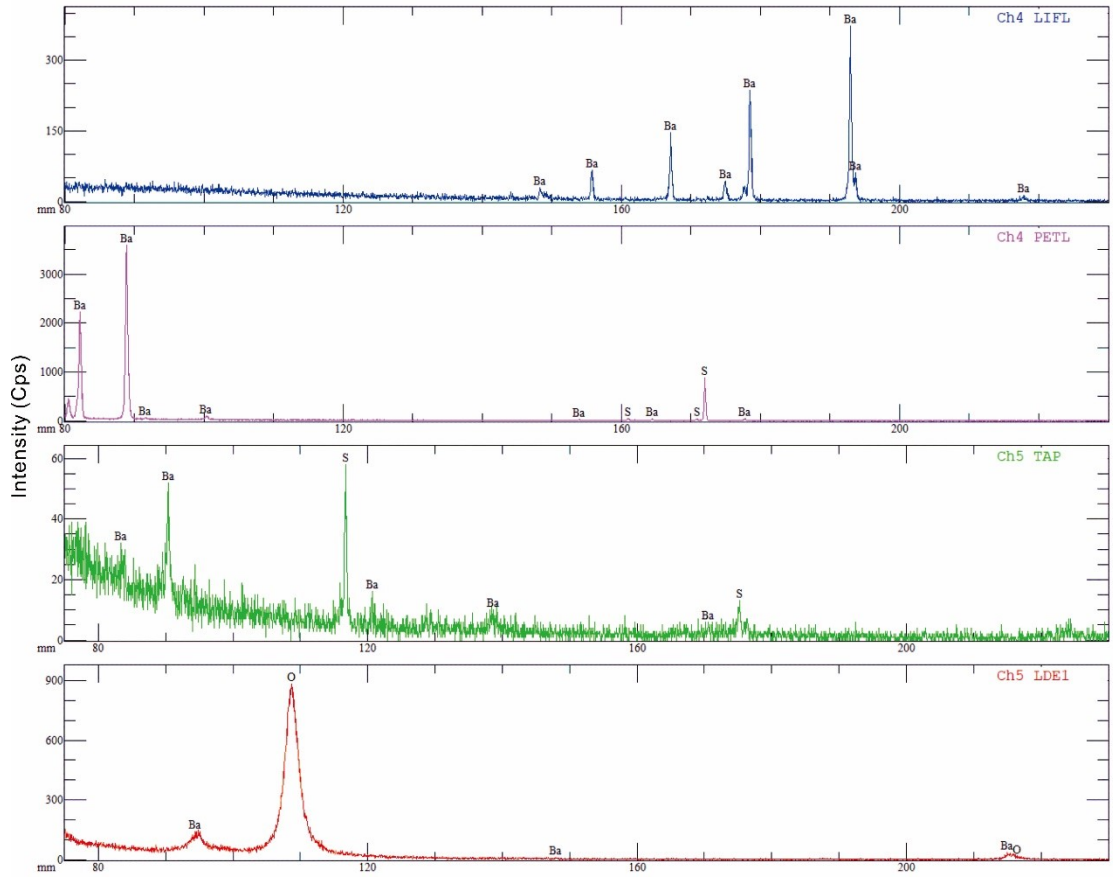

Figure S3. All element scanning wave spectra of FJ barite.

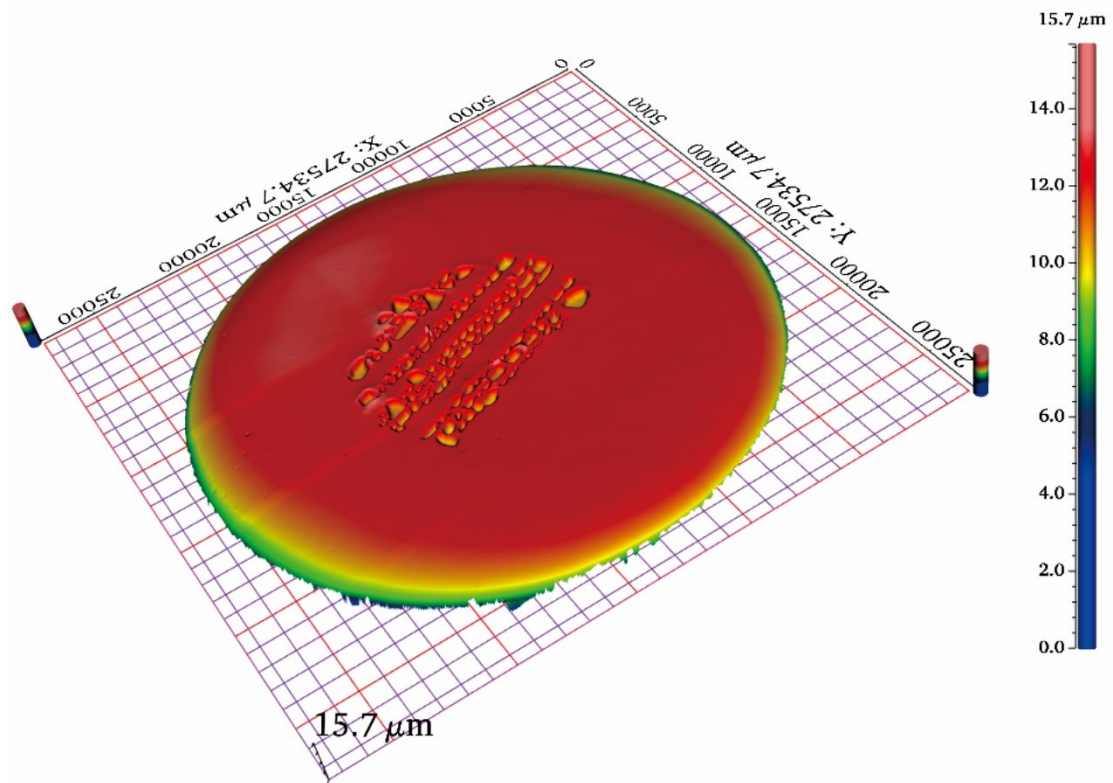

Figure S4. Surface topography of barite mount measured using a profilometer.

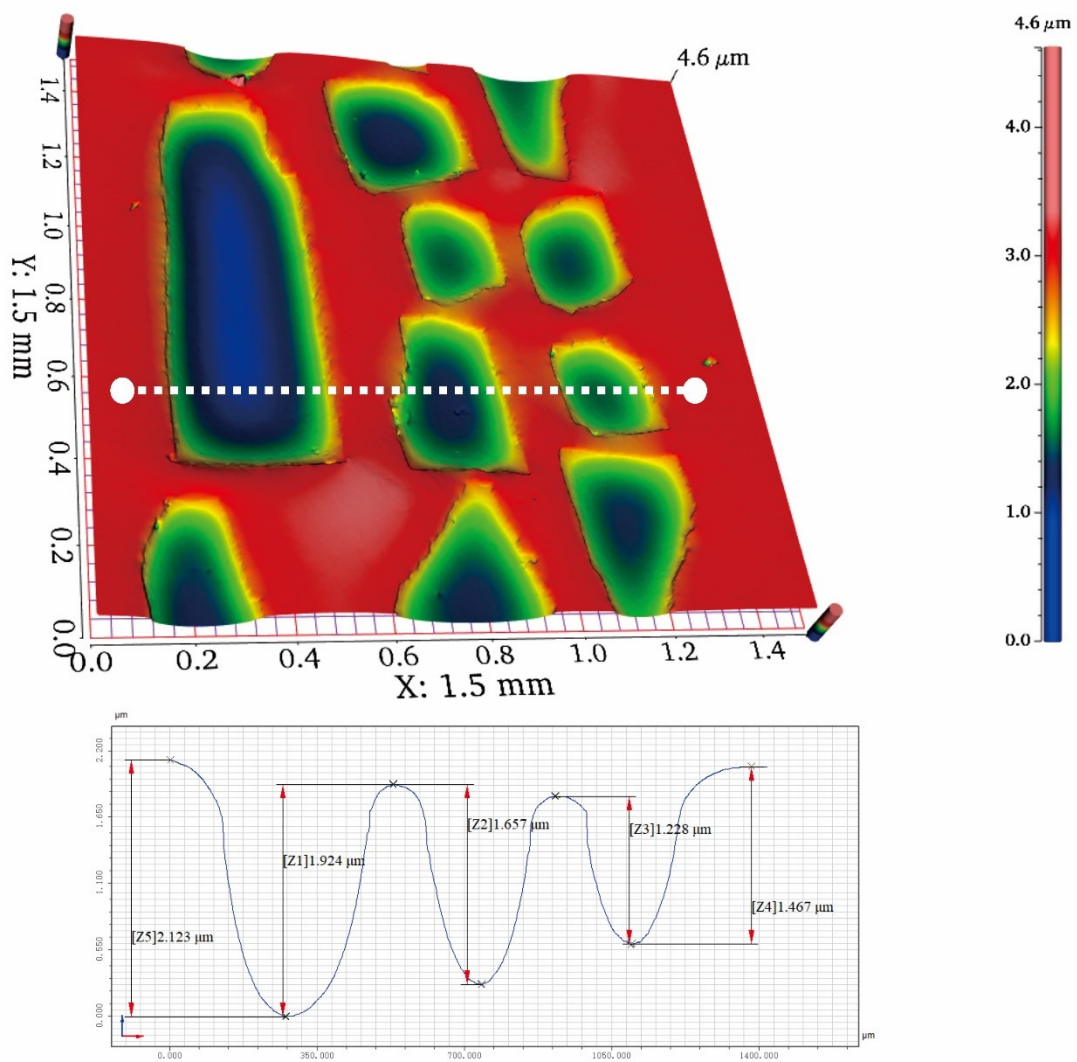

Figure S5. Surface topography of barite fragments measured using a profilometer.
