# Supplementary material for: Barite oxygen isotope reference materials for highly precise and accurate SIMS microanalysis
Source: Royal Society of Chemistry journal article supplement (doi:10.1039/d3ja00353a), 2024-01-01
Supplement: d3ja00353a2.xlsx [file d3ja00353a2.xlsx]

## Sheet: Table S1
Table S1. Summary of SIMS results for the oxygen isotope values of Penglai and Qinghu
Sample #	Date	Ipr (nA)	16O/Coeff	1se(%)	18O/Coeff	1se(%)	18O/16O	1se(%)	δ18O (‰, VSMOW)	2SE	2SD
	2022.11.07		L'2		H'2		H'2/L'2
Penglai@02		3.01	3130000000	0.48	6410000	0.48	0.0020449	0.0071	5.29	0.14	0.27
Penglai@03		3	3110000000	0.47	6360000	0.47	0.0020445	0.0082	5.08	0.16	0.27
Penglai@04		3	3110000000	0.46	6370000	0.46	0.0020446	0.0092	5.11	0.18	0.27
Penglai@05		2.99	3110000000	0.47	6360000	0.47	0.0020448	0.0055	5.24	0.11	0.27
Penglai@06		2.98	3110000000	0.46	6360000	0.46	0.002045	0.0082	5.32	0.16	0.27
Penglai@07		2.98	3100000000	0.48	6350000	0.48	0.0020451	0.0094	5.35	0.19	0.27
Penglai@08		2.97	3090000000	0.47	6320000	0.47	0.0020453	0.011	5.48	0.22	0.27
Penglai@09		2.97	3090000000	0.48	6330000	0.48	0.0020452	0.0096	5.45	0.19	0.27
Penglai@10		2.98	3100000000	0.48	6330000	0.49	0.0020451	0.0076	5.37	0.15	0.27
Penglai@11		2.96	3070000000	0.47	6290000	0.47	0.0020451	0.0087	5.4	0.17	0.27
Qinghu@01		3.01	3130000000	0.49	6400000	0.49	0.0020455	0.0054	5.59	0.11	0.27
Qinghu@02		3.01	3130000000	0.48	6400000	0.49	0.0020458	0.0057	5.73	0.11	0.27
Qinghu@03		3	3120000000	0.5	6380000	0.5	0.0020453	0.0062	5.48	0.12	0.27
Qinghu@04		2.98	3110000000	0.46	6360000	0.46	0.0020452	0.0078	5.43	0.16	0.27
Qinghu@05		2.97	3100000000	0.5	6350000	0.5	0.0020457	0.0077	5.67	0.15	0.27		AVE	2SD
Qinghu@06		2.98	3100000000	0.47	6340000	0.47	0.0020451	0.0066	5.37	0.13	0.27	Penglai	5.309	0.266742
Qinghu@07		2.97	3100000000	0.48	6340000	0.48	0.0020458	0.0055	5.73	0.11	0.27	Qinghu	5.57143	0.293582
Sample #	Date	Ipr (nA)	16O/Coeff	1se(%)	18O/Coeff	1se(%)	18O/16O	1se(%)	δ18O (‰, VSMOW)	2SE	2SD
	2022.11.24		L'2		H'2		H'2/L'2
Penglai@008		2.97	2940000000	0.26	6020000	0.26	0.0020449	0.0073	5.29	0.15	0.23
Penglai@009		2.96	2930000000	0.27	5990000	0.27	0.0020447	0.006	5.2	0.12	0.23
Penglai@010		2.96	2930000000	0.26	5980000	0.27	0.0020451	0.0064	5.4	0.13	0.23
Penglai@011		2.94	2910000000	0.25	5950000	0.25	0.002045	0.0096	5.33	0.19	0.23
Penglai@012		2.95	2900000000	0.26	5930000	0.26	0.0020447	0.0066	5.16	0.13	0.23
Penglai@013		2.93	2890000000	0.28	5900000	0.28	0.0020446	0.0067	5.15	0.13	0.23
Penglai@014		2.92	2880000000	0.25	5890000	0.25	0.0020448	0.0065	5.23	0.13	0.23
Penglai@015		2.92	2870000000	0.24	5880000	0.25	0.0020451	0.0068	5.39	0.14	0.23
Penglai@016		2.92	2880000000	0.24	5880000	0.24	0.0020449	0.0078	5.29	0.16	0.23
Penglai@017		2.93	2890000000	0.25	5920000	0.25	0.0020454	0.0069	5.51	0.14	0.23
Penglai@018		2.92	2900000000	0.24	5920000	0.24	0.0020448	0.0062	5.22	0.12	0.23
Penglai@019		2.91	2880000000	0.25	5900000	0.25	0.0020452	0.0102	5.43	0.2	0.23
Penglai@020		2.9	2900000000	0.25	5930000	0.25	0.0020452	0.0086	5.43	0.17	0.23
Qinghu@005		2.96	2940000000	0.27	6010000	0.27	0.0020454	0.0046	5.53	0.09	0.23
Qinghu@006		2.94	2920000000	0.27	5960000	0.27	0.0020452	0.0078	5.41	0.16	0.23
Qinghu@007		2.93	2890000000	0.24	5920000	0.24	0.0020457	0.0064	5.67	0.13	0.23
Qinghu@008		2.92	2890000000	0.25	5910000	0.25	0.0020456	0.006	5.61	0.12	0.23		AVE	2SD
Qinghu@009		2.93	2890000000	0.23	5920000	0.23	0.0020454	0.0079	5.52	0.16	0.23	Penglai	5.31	0.230362
Qinghu@010		2.91	2900000000	0.27	5930000	0.27	0.0020457	0.0046	5.66	0.09	0.23	Qinghu	5.56667	0.198662
Sample #	Date	Ipr (nA)	16O/Coeff	1se(%)	18O/Coeff	1se(%)	18O/16O	1se(%)	δ18O (‰, VSMOW)	2SE	2SD
	2022.12.19		L'2		H'2		H'2/L'2
Penglai@002		3.0005	3074234000	0.0552806	6263495	0.0512665	0.00203742	0.00759244	5.26954	0.151849	0.255289
Penglai@003		3.00043	3066425000	0.0881919	6246854	0.0830051	0.00203718	0.00851012	5.1526	0.170202	0.255289
Penglai@004		2.99526	3064711000	0.058228	6243968	0.0544196	0.00203738	0.00654374	5.24931	0.130875	0.255289
Penglai@005		2.98807	3052253000	0.0806379	6217790	0.0774844	0.00203712	0.00711486	5.12103	0.142297	0.255289
Penglai@006		2.9779	3064170000	0.0779928	6242334	0.0734054	0.0020372	0.0110092	5.16445	0.220184	0.255289
Penglai@007		2.96194	3075000000	0.0589547	6266259	0.0573475	0.00203781	0.0077452	5.46246	0.154904	0.255289
Penglai@008		2.95466	3053579000	0.0500614	6221886	0.0495315	0.00203757	0.00724124	5.34602	0.144825	0.255289
Penglai@009		2.94942	3036264000	0.0591925	6187107	0.0574518	0.00203774	0.00768497	5.42743	0.153699	0.255289
Penglai@010		2.94136	3008847000	0.107417	6130887	0.105416	0.00203762	0.00686681	5.3702	0.137336	0.255289
Penglai@011		2.93659	3025657000	0.0414693	6165075	0.0399334	0.0020376	0.00762671	5.35934	0.152534	0.255289
Penglai@012		2.93056	3018970000	0.0387854	6152235	0.0398799	0.00203786	0.00778224	5.48763	0.155645	0.255289
Qinghu@001		3.00004	3056616000	0.10193	6228105	0.0986458	0.00203758	0.00992454	5.35145	0.198491	0.255289
Qinghu@002		2.98869	3051158000	0.088731	6216984	0.0851498	0.00203758	0.00943807	5.35145	0.188761	0.255289
Qinghu@003		2.9545	3052017000	0.0449753	6219683	0.04258	0.00203789	0.00751997	5.5044	0.150399	0.255289		AVE	2SD
Qinghu@004		2.938	3018421000	0.073902	6152235	0.0699163	0.00203823	0.00877573	5.67117	0.175515	0.255289	Penglai	5.31	0.255289
Qinghu@005		2.93831	3022387000	0.144245	6159490	0.1472	0.00203795	0.0062591	5.5345	0.125182	0.255289	Qinghu	5.48259	0.270427
Sample #	Date	Ipr (nA)	16O/Coeff	1se(%)	18O/Coeff	1se(%)	18O/16O	1se(%)	δ18O (‰, VSMOW)	2SE	2SD
	2023.04.18		L'2		H'2		H'2/L'2
Penglai@001		2.36	2080000000	0.6	4180000	0.6	0.0020103	0.0053	5.3	0.11	0.27
Penglai@002		2.37	2080000000	0.65	4170000	0.65	0.0020098	0.0059	5.05	0.12	0.27
Penglai@003		2.38	2100000000	0.64	4220000	0.64	0.00201	0.0053	5.16	0.11	0.27
Penglai@004		2.39	2100000000	0.65	4230000	0.65	0.0020104	0.0065	5.35	0.13	0.27
Penglai@005		2.4	2110000000	0.62	4230000	0.62	0.0020103	0.0065	5.31	0.13	0.27
Penglai@006		2.4	2110000000	0.63	4240000	0.63	0.0020102	0.0059	5.26	0.12	0.27
Penglai@007		2.41	2130000000	0.63	4280000	0.63	0.0020102	0.0077	5.24	0.15	0.27
Penglai@008		2.44	2150000000	0.63	4320000	0.63	0.0020103	0.0052	5.27	0.1	0.27
Penglai@009		2.42	2130000000	0.61	4280000	0.61	0.0020104	0.0053	5.35	0.11	0.27
Penglai@010		2.4	2130000000	0.64	4280000	0.64	0.0020108	0.006	5.51	0.12	0.27
Penglai@011		2.42	2150000000	0.62	4320000	0.62	0.0020108	0.0071	5.54	0.14	0.27
Penglai@012		2.41	2140000000	0.64	4290000	0.63	0.0020103	0.0058	5.3	0.12	0.27
Penglai@013		2.41	2130000000	0.63	4280000	0.63	0.0020105	0.0079	5.4	0.16	0.27
Penglai@014		2.32	2040000000	0.64	4110000	0.64	0.0020099	0.0054	5.07	0.11	0.27
Penglai@015		2.31	2040000000	0.62	4090000	0.62	0.0020104	0.0058	5.32	0.12	0.27
Penglai@016		2.31	2040000000	0.64	4110000	0.64	0.0020104	0.0061	5.33	0.12	0.27
Penglai@018		2.31	2040000000	0.64	4090000	0.63	0.0020108	0.0054	5.52	0.11	0.27
Penglai@019		2.31	2030000000	0.63	4090000	0.64	0.0020103	0.0054	5.3	0.11	0.27
Qinghu@001		2.37	2090000000	0.65	4200000	0.65	0.0020102	0.0063	5.25	0.13	0.27
Qinghu@002		2.39	2120000000	0.66	4260000	0.66	0.0020102	0.0056	5.26	0.11	0.27
Qinghu@003		2.4	2100000000	0.62	4230000	0.63	0.0020105	0.0058	5.41	0.12	0.27
Qinghu@004		2.43	2150000000	0.66	4320000	0.65	0.0020105	0.0059	5.4	0.12	0.27
Qinghu@005		2.41	2130000000	0.66	4290000	0.66	0.0020104	0.0073	5.35	0.15	0.27
Qinghu@006		2.41	2140000000	0.67	4310000	0.67	0.0020108	0.0052	5.55	0.1	0.27
Qinghu@007		2.32	2050000000	0.61	4130000	0.61	0.0020109	0.0053	5.61	0.11	0.27
Qinghu@008		2.3	2040000000	0.63	4100000	0.63	0.0020107	0.0071	5.48	0.14	0.27		AVE	2SD
Qinghu@009		2.31	2030000000	0.64	4080000	0.64	0.0020113	0.0082	5.77	0.16	0.27	Penglai	5.31	0.26824
Qinghu@010		2.31	2040000000	0.6	4100000	0.6	0.002011	0.0057	5.61	0.11	0.27	Qinghu	5.469	0.334059
Sample #	Date	Ipr (nA)	16O/Coeff	1se(%)	18O/Coeff	1se(%)	18O/16O	1se(%)	δ18O (‰, VSMOW)	2SE	2SD
	2023.08.29		L'2		H'2		H'2/L'2
Penglai@01		2.58	2280000000	0.34	4600000	0.34	0.0020142	0.0109	5.25	0.22	0.17
Penglai@02		2.58	2290000000	0.3	4610000	0.3	0.0020143	0.0071	5.3	0.14	0.17
Penglai@03		2.58	2290000000	0.32	4600000	0.32	0.002014	0.0091	5.19	0.18	0.17
Penglai@04		2.57	2300000000	0.29	4640000	0.29	0.0020142	0.0068	5.27	0.14	0.17
Penglai@05		2.55	2270000000	0.28	4580000	0.28	0.0020144	0.0102	5.35	0.2	0.17
Penglai@06		2.56	2290000000	0.33	4600000	0.34	0.0020143	0.0101	5.34	0.2	0.17
Penglai@07		2.55	2270000000	0.31	4580000	0.31	0.0020142	0.0092	5.28	0.18	0.17
Penglai@08		2.55	2270000000	0.34	4570000	0.34	0.0020142	0.0079	5.27	0.16	0.17
Penglai@09		2.54	2270000000	0.31	4580000	0.31	0.0020145	0.0089	5.44	0.18	0.17
Penglai@10		2.53	2270000000	0.28	4570000	0.28	0.0020144	0.0074	5.36	0.15	0.17
Penglai@11		2.54	2260000000	0.33	4560000	0.34	0.0020145	0.0086	5.44	0.17	0.17
Penglai@12		2.54	2270000000	0.29	4570000	0.29	0.002014	0.011	5.17	0.22	0.17
Penglai@13		2.54	2260000000	0.32	4560000	0.32	0.0020142	0.0081	5.28	0.16	0.17
Penglai@14		2.53	2280000000	0.32	4580000	0.32	0.0020145	0.008	5.41	0.16	0.17
Qinghu@01		2.59	2310000000	0.32	4650000	0.32	0.0020149	0.0094	5.61	0.19	0.17
Qinghu@02		2.57	2300000000	0.33	4630000	0.33	0.0020144	0.0097	5.4	0.19	0.17
Qinghu@03		2.56	2280000000	0.33	4590000	0.33	0.0020145	0.0072	5.44	0.14	0.17
Qinghu@04		2.54	2280000000	0.3	4590000	0.3	0.0020146	0.0064	5.48	0.13	0.17
Qinghu@05		2.54	2270000000	0.3	4580000	0.31	0.0020148	0.0074	5.56	0.15	0.17		AVE	2SD
Qinghu@06		2.54	2270000000	0.32	4580000	0.32	0.0020148	0.0063	5.59	0.13	0.17	Penglai	5.31071	0.167785
Qinghu@07		2.54	2270000000	0.34	4580000	0.34	0.0020149	0.0076	5.63	0.15	0.17	Qinghu	5.53	0.179629

## Sheet: Table S2
Table S2. Summary of SIMS results for the oxygen isotope values of FJ.
General Table	Summary of oxygen isotope values of FJ barite measured by SIMS in 6 sessions over the last ten month. NJU-Ba-1 barite was used as a bracketing standard to correct IMF and the δ18 value of NJU-Ba-1 measured by GS-IRMS is 7.94 ± 0.30‰ (2SD, N=11). M is number of fragments, N is number of spots, Del is number of rejected spots. 2SE = (2SDNJU-Ba-1^2/N NJU-Ba-1+2SDFJ^2/N NJU-Ba-1) ^0.5
	FJ	Date	δ18O (‰, VSMOW)	2SD	2SE	M	N	Del	2SD(STD-NJU-Ba-1)	N
	Session 1	2022-12-19	7.7	0.55	0.10435	20	45	0	0.25	15
	Session 2	2022-12-20	7.57	0.61	0.0895692	41	85	0	0.27	20
	Session 3	2022-12-21	7.73	0.68	0.10323	25	50	0	0.13	12
	Session 4	2023-04-21	7.65	0.48	0.0840909	12	65	0	0.23	15
	Session 5	2023-04-22	7.58	0.5	0.106006	4	45	0	0.25	11
	Session 6	2023-08-29	7.51	0.57	0.123129	18	35	0	0.23	9
		Mean	7.62	0.58	0.0321726	120	325			82
		Repeatability	7.62	0.17
Details
Session 1		Date	Start time	Ipr (nA)	16O/Coeff	1se(%)	18O/Coeff	1se(%)	18O/16O	1se(%)	δ18O (‰, raw)		δ18O (‰, VSMOW)	2se (‰)		x-posn	y-posn	DT1 - x	DT1 - y	DTCA x	DTCA y
Sample #					L'2		H'2		H'2/L'2							(μm)	(μm)	(digits)	(digits)	(digits)	(digits)
NJU-Ba-1@01		2022-12-19	19:26:00	1.98686	3349098000	0.29924	6866647	0.29703	0.0020503	0.00602187	22.4915					-6007	295	19	16	-7	15
NJU-Ba-1@02		2022-12-19	19:30:00	1.98803	3364028000	0.322169	6895401	0.318937	0.00204975	0.00649124	22.2167					-6173	189	17	17	-3	21
NJU-Ba-1@03		2022-12-19	19:35:00	1.99398	3360647000	0.317986	6889089	0.315165	0.00204993	0.00809293	22.3085					-6135	249	17	17	-4	17
NJU-Ba-1@04		2022-12-19	19:39:00	1.99304	3368937000	0.312771	6906946	0.308923	0.00205019	0.0071985	22.4367					-6086	165	18	18	-7	24
NJU-Ba-1@05		2022-12-19	19:43:00	1.98866	3349976000	0.297716	6867338	0.293998	0.00204997	0.00799619	22.3274					-6078	297	17	16	-5	16
FJ@01		2022-12-19	19:48:00	1.98952	3351869000	0.298877	6868381	0.296231	0.00204912	0.00820285		21.9045	7.46047	0.164057		-5960	-720	19	18	-5	22
FJ@02		2022-12-19	19:52:00	1.99077	3363666000	0.284844	6894250	0.283414	0.00204963	0.00735548		22.1554	7.70778	0.14711		-5884	-712	20	19	-10	22
FJ@03		2022-12-19	19:57:00	1.98968	3349032000	0.302279	6865452	0.298615	0.00204998	0.007323		22.3344	7.88428	0.14646		-5675	-650	18	16	-8	15
FJ@04		2022-12-19	20:01:00	1.98983	3377227000	0.30049	6922558	0.297627	0.00204978	0.00660413		22.2317	7.783	0.132083		-5290	-589	17	16	-4	18
FJ@05		2022-12-19	20:10:00	1.986	3352865000	0.281155	6873708	0.277589	0.0020501	0.0058268		22.3938	7.94279	0.116536		-5166	-610	16	16	-9	18
NJU-Ba-1@06		2022-12-19	20:05:00	1.98725	3355336000	0.291016	6878278	0.285494	0.00204996	0.00941021	22.3215					-5104	915	16	14	-7	15
FJ@06		2022-12-19	20:14:00	1.98005	3345344000	0.286866	6858038	0.282209	0.00205003	0.00893976		22.3569	7.9064	0.178795		-5146	-656	18	17	-8	20
FJ@07		2022-12-19	20:19:00	1.97958	3359772000	0.308884	6883820	0.304158	0.0020489	0.00766408		21.7938	7.35133	0.153282		-4939	-662	15	16	-5	17
FJ@08		2022-12-19	20:23:00	1.9817	3351489000	0.316993	6871289	0.3134	0.00205022	0.00694662		22.4536	8.00178	0.138932		-4871	-643	16	16	-6	17
FJ@09		2022-12-19	20:27:00	1.98451	3360750000	0.302255	6888722	0.299611	0.00204976	0.00476331		22.2227	7.77415	0.0952663		-4814	-627	15	15	-6	17
FJ@10		2022-12-19	20:36:00	1.98123	3370558000	0.306965	6909141	0.305857	0.00204985	0.00543197		22.2686	7.81938	0.108639		-4381	-543	14	16	-7	19
NJU-Ba-1@07		2022-12-19	20:32:00	1.98209	3355864000	0.29857	6880171	0.295253	0.0020502	0.00761856	22.4407					-4517	365	16	18	-11	25
FJ@11		2022-12-19	20:40:00	1.98412	3364810000	0.301813	6897769	0.298188	0.00204998	0.00721891		22.3304	7.88035	0.144378		-4373	-596	16	16	-8	19
FJ@12		2022-12-19	20:45:00	1.98201	3362797000	0.297649	6893868	0.295266	0.00205004	0.00486726		22.3634	7.9128	0.0973451		-4321	-586	14	16	-9	22
FJ@13		2022-12-19	20:49:00	1.98256	3363433000	0.294964	6891975	0.292407	0.00204909	0.0071203		21.8891	7.44523	0.142406		-3927	-536	12	15	-6	17
FJ@14		2022-12-19	20:53:00	1.98733	3371236000	0.300684	6908220	0.296538	0.00204917	0.00705107		21.928	7.48358	0.141021		-3884	-513	12	15	-7	16
FJ@15		2022-12-19	21:02:00	1.98639	3367972000	0.301904	6902476	0.296258	0.00204945	0.0089721		22.0686	7.62223	0.179442		-3826	-515	12	15	-11	19
NJU-Ba-1@08		2022-12-19	20:58:00	1.98631	3391537000	0.343721	6951766	0.33842	0.00204975	0.00839589	22.2152					-3852	476	12	17	-6	21
FJ@16		2022-12-19	21:07:00	1.98608	3377110000	0.305202	6920535	0.301345	0.00204925	0.00759567		21.9694	7.52439	0.151913		-3523	-498	12	15	-7	17
FJ@17		2022-12-19	21:11:00	1.98553	3376559000	0.302138	6919851	0.299435	0.00204938	0.00608195		22.0342	7.5883	0.121639		-3473	-486	10	14	-10	18
FJ@18		2022-12-19	21:15:00	1.98436	3368047000	0.30958	6900404	0.3065	0.00204879	0.00762678		21.738	7.29626	0.152536		-3512	-546	11	15	-9	20
FJ@19		2022-12-19	21:20:00	1.9853	3381562000	0.304735	6930605	0.301519	0.00204953	0.00655428		22.108	7.66107	0.131086		-3069	-439	8	15	-9	21
FJ@20		2022-12-19	21:28:00	1.98451	3375961000	0.330208	6920521	0.327822	0.00204994	0.00621407		22.314	7.86412	0.124281		-3016	-419	8	15	-8	21
NJU-Ba-1@09		2022-12-19	21:24:00	1.98357	3384904000	0.275673	6939235	0.273271	0.00205006	0.00598286	22.3698					-2920	1083	7	14	-7	16
FJ@21		2022-12-19	21:33:00	1.98037	3375795000	0.298098	6919866	0.294503	0.00204985	0.00671387		22.2681	7.81889	0.134277		-2960	-402	8	14	-10	18
FJ@22		2022-12-19	21:37:00	1.97778	3386473000	0.306371	6937399	0.30479	0.00204856	0.006898		21.6258	7.18564	0.13796		-2628	-489	6	14	-4	20
FJ@23		2022-12-19	21:42:00	1.98037	3379948000	0.293858	6925170	0.290723	0.0020489	0.00636788		21.7943	7.35182	0.127358		-2573	-476	7	14	-8	19
FJ@24		2022-12-19	21:46:00	1.97872	3367789000	0.298704	6901433	0.29577	0.00204925	0.00621428		21.9684	7.5234	0.124286		-2510	-457	6	14	-8	19
FJ@25		2022-12-19	21:55:00	1.98177	3373001000	0.3154	6911488	0.310163	0.00204907	0.00915847		21.8771	7.43343	0.183169		-2275	-367	6	14	-8	18
NJU-Ba-1@10		2022-12-19	21:50:00	1.97927	3375299000	0.298119	6918995	0.294715	0.00204989	0.00784553	22.2895					-2257	572	4	15	-9	20
FJ@26		2022-12-19	21:59:00	1.98146	3388875000	0.302962	6942207	0.297832	0.00204854	0.00809139		21.6113	7.17138	0.161828		-2230	-348	6	13	-9	17
FJ@27		2022-12-19	22:03:00	1.97935	3379271000	0.251373	6923047	0.249637	0.00204868	0.00604979		21.6846	7.24365	0.120996		-2182	-329	7	8	-16	6
FJ@28		2022-12-19	22:08:00	1.97708	3384256000	0.300129	6935269	0.296648	0.00204928	0.00723065		21.9823	7.53717	0.144613		-2002	-386	4	14	-8	20
FJ@29		2022-12-19	22:12:00	1.97802	3377364000	0.307183	6921795	0.302591	0.00204947	0.00768408		22.0786	7.63206	0.153682		-1943	-376	4	14	-8	18
FJ@30		2022-12-19	22:21:00	1.97935	3368892000	0.306357	6907032	0.305384	0.00205024	0.00644593		22.4616	8.00965	0.128919		-1875	-359	4	13	-12	17
NJU-Ba-1@11		2022-12-19	22:17:00	1.97888	3389527000	0.325837	6949506	0.322261	0.00205029	0.00752764	22.4875					-1741	609	2	15	-9	22
FJ@31		2022-12-19	22:25:00	1.97825	3379165000	0.3058	6927898	0.303024	0.00205018	0.00698495		22.4337	7.98212	0.139699		-1691	-313	3	13	-9	16
FJ@32		2022-12-19	22:30:00	1.97865	3379176000	0.319979	6925192	0.314812	0.00204938	0.00849606		22.0327	7.58683	0.169921		-1638	-326	3	13	-10	19
FJ@33		2022-12-19	22:34:00	1.97958	3375755000	0.323838	6923421	0.321014	0.00205093	0.00766216		22.8052	8.3484	0.153243		-1563	-343	3	14	-13	18
FJ@34		2022-12-19	22:38:00	1.97982	3397572000	0.355124	6963080	0.352018	0.00204943	0.00757384		22.0591	7.61289	0.151477		-1155	-264	1	14	-8	19
FJ@35		2022-12-19	22:47:00	1.97841	3385830000	0.294316	6940559	0.289525	0.00204989	0.00830088		22.2871	7.83757	0.166018		-1079	-256	1	14	-10	18
NJU-Ba-1@12		2022-12-19	22:43:00	1.97825	3389874000	0.312353	6949988	0.310121	0.00205022	0.00619548	22.4531					-1130	879	0	14	-10	19
FJ@36		2022-12-19	22:52:00	1.97747	3372025000	0.297445	6912222	0.29255	0.00204988	0.00729885		22.2816	7.83216	0.145977		-1007	-245	1	14	-13	18
FJ@37		2022-12-19	22:56:00	1.97825	3392004000	0.317567	6952449	0.315313	0.00204966	0.00565938		22.1729	7.72498	0.113188		-798	-298	0	14	-11	20
FJ@38		2022-12-19	23:00:00	1.97309	3382578000	0.304535	6931497	0.300719	0.00204918	0.00709281		21.933	7.4885	0.141856		-730	-267	-2	14	-10	20
FJ@39		2022-12-19	23:05:00	1.97356	3372098000	0.317124	6909494	0.313219	0.00204902	0.00573482		21.8552	7.4118	0.114696		-667	-236	-1	13	-12	18
FJ@40		2022-12-19	23:14:00	1.97348	3398375000	0.321742	6968234	0.317413	0.00205047	0.00718486		22.5743	8.12076	0.143697		-396	-203	-3	14	-10	20
NJU-Ba-1@13		2022-12-19	23:09:00	1.97966	3396577000	0.390328	6963008	0.387435	0.00205001	0.00747086	22.3479					-406	849	-4	13	-13	22
FJ@41		2022-12-19	23:18:00	1.96996	3374997000	0.293905	6920031	0.29176	0.00205038	0.00574283		22.5334	8.08045	0.114857		-341	-188	-2	14	-11	20
FJ@42		2022-12-19	23:22:00	1.97035	3376050000	0.301621	6921593	0.296148	0.00205021	0.00879765		22.4471	7.99539	0.175953		-353	-240	-3	14	-10	23
FJ@43		2022-12-19	23:27:00	1.96644	3382788000	0.304457	6936708	0.301417	0.00205059	0.00706991		22.6376	8.18321	0.141398		-157	-157	-3	13	-8	19
FJ@44		2022-12-19	23:31:00	1.96926	3385221000	0.310292	6939422	0.305411	0.00204992	0.00716682		22.3035	7.8538	0.143336		-102	-193	-3	13	-12	20
FJ@45		2022-12-19	23:35:00	1.97239	3380284000	0.3178	6929079	0.315258	0.00204986	0.00755118		22.2696	7.82036	0.151024		-49	-214	-3	14	-14	22
NJU-Ba-1@14		2022-12-19	23:40:00	1.9702	3372755000	0.300561	6914993	0.296694	0.00205025	0.00729548	22.4691					-124	811	-4	13	-12	21
NJU-Ba-1@15		2022-12-19	23:44:00	1.97528	3369133000	0.343486	6909048	0.339005	0.0020507	0.00882886	22.689					-59	829	-5	13	-15	21
										AVE	22.391	22.1519	7.70436
										2SD	0.246273	0.55931	0.551405
Session 2		Date	Start time	Ipr (nA)	16O/Coeff	1se(%)	18O/Coeff	1se(%)	18O/16O	1se(%)	δ18O (‰, raw)		δ18O (‰, VSMOW)	2se (‰)		x-posn	y-posn	DT1 - x	DT1 - y	DTCA x	DTCA y
Sample #					L'2		H'2		H'2/L'2							(μm)	(μm)	(digits)	(digits)	(digits)	(digits)
NJU-Ba-1@001		2022-12-20	00:53:00	1.99171	3356199000	0.304767	6882445	0.299193	0.00205067	0.00837094	22.678					-5964	199	19	17	-8	20
NJU-Ba-1@002		2022-12-20	00:58:00	1.99171	3359673000	0.300311	6887498	0.294365	0.00205006	0.00838695	22.3703					-6054	212	17	17	-5	20
NJU-Ba-1@003		2022-12-20	01:02:00	1.99069	3351874000	0.300609	6870749	0.295728	0.00204983	0.00827573	22.2566					-5967	251	18	17	-7	18
FJ@001		2022-12-20	01:06:00	1.98608	3360702000	0.310082	6885814	0.307255	0.00204893	0.00610447		21.8058	7.29416	0.122089		-6423	-883	18	19	-4	20
FJ@002		2022-12-20	01:11:00	1.98381	3354133000	0.304304	6872462	0.300364	0.00204896	0.0062219		21.8223	7.31038	0.124438		-6387	-851	17	19	-6	19
FJ@003		2022-12-20	01:15:00	1.9824	3356188000	0.309808	6876032	0.30609	0.00204877	0.00591823		21.727	7.21648	0.118365		-6232	-882	19	19	-6	19
FJ@004		2022-12-20	01:19:00	1.98342	3350445000	0.305441	6862796	0.302004	0.00204833	0.0067531		21.5081	7.00066	0.135062		-6181	-886	18	19	-6	22
FJ@005		2022-12-20	01:24:00	1.9842	3375686000	0.304392	6916648	0.302036	0.00204896	0.008359		21.8253	7.31333	0.16718		-6273	-1061	19	20	0	20
NJU-Ba-1@004		2022-12-20	01:28:00	1.9842	3324153000	0.293298	6815134	0.290046	0.00205019	0.00634289	22.4367					-5808	515	17	16	-5	17
FJ@006		2022-12-20	01:33:00	1.9806	3356812000	0.298505	6881020	0.292677	0.00204987	0.00751441		22.2791	7.76071	0.150288		-6220	-1051	18	20	-5	19
FJ@007		2022-12-20	01:37:00	1.98052	3360771000	0.300927	6887801	0.298572	0.00204947	0.00618022		22.0791	7.56357	0.123604		-6247	-1109	19	20	-3	20
FJ@008		2022-12-20	01:41:00	1.98013	3349586000	0.302095	6865186	0.300629	0.00204956	0.00677639		22.1245	7.6083	0.135528		-5960	-867	18	20	-6	21
FJ@009		2022-12-20	01:46:00	1.97865	3357074000	0.296767	6879099	0.297589	0.00204913	0.00537841		21.91	7.39691	0.107568		-5846	-914	18	19	-6	22
FJ@010		2022-12-20	01:50:00	1.97872	3347141000	0.297326	6858967	0.293153	0.00204921	0.00751393		21.9464	7.43279	0.150279		-5792	-900	18	19	-6	20
NJU-Ba-1@005		2022-12-20	01:54:00	1.97966	3345647000	0.298314	6859140	0.295886	0.00205017	0.00551225	22.4272					-5755	546	17	16	-6	17
FJ@011		2022-12-20	01:59:00	1.97966	3347245000	0.292968	6857657	0.290167	0.00204875	0.00726035		21.7185	7.20812	0.145207		-5745	-884	18	18	-5	20
FJ@012		2022-12-20	02:03:00	1.97857	3346574000	0.300692	6856505	0.297542	0.00204882	0.00657987		21.7519	7.24106	0.131597		-5987	-1045	18	19	-3	16
FJ@013		2022-12-20	02:07:00	1.97833	3352388000	0.299554	6869072	0.297322	0.00204901	0.00685969		21.8492	7.33693	0.137194		-5936	-1048	18	19	-5	18
FJ@014		2022-12-20	02:12:00	1.97536	3350783000	0.292082	6867431	0.286183	0.00204951	0.00924277		22.0961	7.58028	0.184855		-6008	-1099	19	19	-4	21
FJ@015		2022-12-20	02:16:00	1.97426	3346342000	0.299314	6856613	0.297284	0.00204899	0.0075894		21.8382	7.32611	0.151788		-5957	-1096	19	19	-5	21
NJU-Ba-1@006		2022-12-20	02:21:00	1.97043	3335742000	0.29455	6838216	0.2923	0.00204999	0.00649806	22.3349					-5749	289	17	17	-7	21
FJ@016		2022-12-20	02:25:00	1.97176	3341018000	0.289402	6849992	0.285173	0.00205027	0.0069714		22.4791	7.95785	0.139428		-5785	-1097	19	19	-4	20
FJ@017		2022-12-20	02:29:00	1.97043	3337639000	0.281179	6839433	0.279421	0.00204918	0.00537658		21.9355	7.42198	0.107532		-5725	-1124	16	19	-5	23
FJ@018		2022-12-20	02:34:00	1.97043	3335120000	0.292542	6836136	0.288627	0.00204975	0.00628975		22.2157	7.69827	0.125795		-5638	-1082	19	19	-9	20
FJ@019		2022-12-20	02:38:00	1.97168	3343580000	0.282383	6852381	0.279282	0.00204942	0.00607956		22.0517	7.53653	0.121591		-5474	-1124	18	19	-5	20
FJ@020		2022-12-20	02:42:00	1.97161	3345482000	0.349225	6859060	0.34622	0.00205025	0.00754782		22.4666	7.94556	0.150956		-5395	-1118	17	19	-7	19
NJU-Ba-1@007		2022-12-20	02:47:00	1.97309	3332475000	0.298769	6832314	0.297163	0.00205022	0.00695265	22.4536					-5658	310	16	17	-6	20
FJ@021		2022-12-20	02:51:00	1.9684	3327339000	0.280219	6820776	0.276823	0.00204992	0.00604789		22.3035	7.7848	0.120958		-5330	-1086	18	18	-8	20
FJ@022		2022-12-20	02:55:00	1.96918	3331849000	0.295533	6829018	0.289365	0.00204962	0.00991299		22.1549	7.63829	0.19826		-5242	-1058	18	18	-9	19
FJ@023		2022-12-20	03:00:00	1.96879	3338992000	0.302246	6841793	0.299057	0.00204906	0.00627526		21.8746	7.362	0.125505		-5332	-831	17	17	-4	19
FJ@024		2022-12-20	03:04:00	1.96754	3332637000	0.284483	6831443	0.279881	0.00204987	0.00727904		22.2751	7.75677	0.145581		-5286	-865	17	18	-5	21
FJ@025		2022-12-20	03:09:00	1.96785	3339228000	0.296243	6841376	0.292215	0.00204879	0.0076449		21.741	7.23025	0.152898		-5025	-807	16	17	-6	20
NJU-Ba-1@008		2022-12-20	03:13:00	1.96754	3354441000	0.296493	6876104	0.292934	0.00204986	0.00674745	22.2696					-5006	352	15	18	-3	21
FJ@026		2022-12-20	03:17:00	1.96801	3333310000	0.295317	6830889	0.292913	0.00204928	0.0054213		21.9848	7.47065	0.108426		-4968	-807	17	18	-8	20
FJ@027		2022-12-20	03:22:00	1.96801	3327446000	0.288349	6817674	0.287028	0.00204892	0.00547126		21.8048	7.29317	0.109425		-4966	-864	17	18	-8	22
FJ@028		2022-12-20	03:26:00	1.96887	3340781000	0.290648	6846594	0.287453	0.0020494	0.00914659		22.0442	7.52915	0.182932		-5020	-893	17	18	-6	22
FJ@029		2022-12-20	03:30:00	1.96456	3333059000	0.281485	6833567	0.280459	0.00205024	0.00618334		22.4616	7.94064	0.123667		-4874	-1021	16	18	-7	21
FJ@030		2022-12-20	03:35:00	1.96214	3339489000	0.28363	6840376	0.278814	0.00204834	0.00805291		21.5116	7.0041	0.161058		-4796	-820	16	17	-5	19
NJU-Ba-1@009		2022-12-20	03:39:00	1.96316	3319394000	0.297208	6805143	0.291519	0.00205012	0.00868636	22.4033					-4866	315	16	18	-8	22
FJ@031		2022-12-20	03:44:00	1.96167	3327147000	0.289486	6815328	0.285703	0.0020484	0.00718657		21.546	7.03802	0.143731		-4747	-797	16	17	-6	19
FJ@032		2022-12-20	03:48:00	1.96183	3327505000	0.284578	6815666	0.281493	0.00204828	0.00840185		21.4866	6.97952	0.168037		-4731	-853	16	17	-7	20
FJ@033		2022-12-20	03:52:00	1.9612	3330570000	0.29957	6824958	0.294861	0.00204919	0.00714419		21.939	7.42542	0.142884		-4499	-731	15	17	-8	18
FJ@034		2022-12-20	03:57:00	1.95956	3325744000	0.29205	6813593	0.287131	0.00204875	0.00888991		21.7175	7.20714	0.177798		-4517	-791	15	17	-8	22
FJ@035		2022-12-20	04:01:00	1.9601	3328462000	0.282479	6818833	0.277694	0.00204865	0.00762873		21.6682	7.15847	0.152575		-4546	-857	16	18	-7	22
NJU-Ba-1@010		2022-12-20	04:05:00	1.95885	3314407000	0.284878	6794484	0.282173	0.00204999	0.00523499	22.3359					-4650	664	15	15	-9	17
FJ@036		2022-12-20	04:10:00	1.95838	3326266000	0.289919	6815717	0.284176	0.00204907	0.00749642		21.8761	7.36348	0.149928		-4736	-1114	16	18	-8	21
FJ@037		2022-12-20	04:14:00	1.95729	3324308000	0.287139	6812679	0.286874	0.00204935	0.00525655		22.0192	7.50457	0.105131		-4684	-1096	16	18	-8	20
FJ@038		2022-12-20	04:19:00	1.95682	3330565000	0.286258	6827672	0.280434	0.00205001	0.0088197		22.3474	7.82806	0.176394		-4306	-999	15	18	-8	22
FJ@039		2022-12-20	04:23:00	1.95862	3328708000	0.298051	6824044	0.295308	0.00205006	0.00507223		22.3723	7.85264	0.101445		-4275	-845	14	17	-8	19
FJ@040		2022-12-20	04:27:00	1.95737	3325996000	0.301743	6817588	0.298776	0.00204979	0.00678241		22.2382	7.72039	0.135648		-4213	-839	14	16	-10	20
NJU-Ba-1@011		2022-12-20	04:32:00	1.95612	3348863000	0.306554	6865092	0.303487	0.00204998	0.00585087	22.3324					-4250	467	13	17	-6	21
FJ@041		2022-12-20	04:36:00	1.95439	3325131000	0.298873	6815378	0.295511	0.00204966	0.00666677		22.1729	7.65599	0.133335		-4014	-783	13	17	-8	22
FJ@042		2022-12-20	04:40:00	1.95299	3314329000	0.283939	6792655	0.279732	0.00204949	0.00823377		22.0856	7.56996	0.164675		-3964	-732	13	16	-7	18
FJ@043		2022-12-20	04:45:00	1.95205	3306873000	0.272198	6777447	0.268437	0.00204951	0.00552415		22.0961	7.58028	0.110483		-3885	-713	13	16	-10	20
FJ@044		2022-12-20	04:49:00	1.95072	3314670000	0.300273	6793202	0.297429	0.00204944	0.00790221		22.0621	7.54685	0.158044		-3954	-774	13	17	-8	22
FJ@045		2022-12-20	04:54:00	1.94821	3319416000	0.306749	6803733	0.30189	0.00204968	0.0084652		22.1843	7.6673	0.169304		-4127	-990	13	18	-7	21
NJU-Ba-1@012		2022-12-20	04:58:00	1.9479	3310054000	0.28511	6786854	0.28271	0.00205038	0.00806319	22.5309					-3945	706	12	16	-10	22
FJ@046		2022-12-20	05:02:00	1.94547	3306796000	0.281357	6779311	0.278901	0.00205012	0.00730486		22.4008	7.88066	0.146097		-4041	-961	13	18	-8	22
FJ@047		2022-12-20	05:07:00	1.94227	3309347000	0.280733	6787358	0.275979	0.00205097	0.00865527		22.8262	8.30001	0.173105		-3837	-929	13	17	-7	22
FJ@048		2022-12-20	05:11:00	1.94203	3302841000	0.291839	6771171	0.291582	0.0020501	0.0055813		22.3943	7.87427	0.111626		-3842	-971	13	17	-8	21
FJ@049		2022-12-20	05:15:00	1.94078	3313460000	0.294931	6790741	0.291056	0.00204944	0.00762725		22.0651	7.5498	0.152545		-3676	-724	12	16	-6	18
FJ@050		2022-12-20	05:20:00	1.94047	3313972000	0.290337	6791302	0.286501	0.0020493	0.00924426		21.9918	7.47753	0.184885		-3668	-772	12	16	-7	20
NJU-Ba-1@013		2022-12-20	05:24:00	1.94211	3296131000	0.293132	6759302	0.288228	0.00205068	0.00677189	22.6825					-3591	558	11	17	-12	19
FJ@051		2022-12-20	05:29:00	1.94196	3311396000	0.284975	6788877	0.28174	0.00205016	0.00652261		22.4212	7.90082	0.130452		-3592	-981	12	17	-6	20
FJ@052		2022-12-20	05:33:00	1.94196	3303902000	0.301699	6773560	0.297635	0.00205018	0.00693241		22.4292	7.90868	0.138648		-3544	-962	11	17	-8	21
FJ@053		2022-12-20	05:37:00	1.93969	3297409000	0.288637	6759986	0.286105	0.00205009	0.00708453		22.3883	7.86837	0.141691		-3468	-937	12	16	-10	19
FJ@054		2022-12-20	05:42:00	1.94109	3308101000	0.285154	6781945	0.281465	0.00205011	0.00728982		22.3953	7.87525	0.145796		-3310	-677	11	15	-8	19
FJ@055		2022-12-20	05:46:00	1.93851	3307051000	0.296623	6779714	0.294271	0.00205008	0.00612483		22.3823	7.86247	0.122497		-3250	-679	10	15	-9	20
NJU-Ba-1@014		2022-12-20	05:50:00	1.93624	3298337000	0.302781	6763728	0.298959	0.00205065	0.00682473	22.6676					-3230	489	8	17	-9	22
FJ@056		2022-12-20	05:55:00	1.9375	3294185000	0.293877	6752738	0.290115	0.0020499	0.00708496		22.2925	7.77398	0.141699		-3185	-699	10	16	-11	22
FJ@057		2022-12-20	05:59:00	1.93742	3312776000	0.308744	6790460	0.306009	0.00204978	0.00734621		22.2337	7.71597	0.146924		-3272	-918	11	17	-7	20
FJ@058		2022-12-20	06:04:00	1.93593	3304062000	0.295955	6773315	0.292189	0.00205	0.0081623		22.3424	7.82314	0.163246		-3220	-915	10	17	-8	21
FJ@059		2022-12-20	06:08:00	1.9357	3289001000	0.292695	6742042	0.286874	0.00204988	0.009331		22.2831	7.76464	0.18662		-3154	-915	10	17	-11	22
FJ@060		2022-12-20	06:12:00	1.93186	3286649000	0.280512	6736795	0.274191	0.00204975	0.00783539		22.2187	7.70122	0.156708		-3197	-860	10	16	-8	20
NJU-Ba-1@015		2022-12-20	06:17:00	1.93257	3269727000	0.343197	6703002	0.339417	0.00205002	0.00803335	22.3539					-2920	528	8	16	-10	20
FJ@061		2022-12-20	06:21:00	1.93319	3300298000	0.292749	6764261	0.28627	0.0020496	0.00895553		22.1414	7.62502	0.179111		-3246	-956	10	17	-6	22
FJ@062		2022-12-20	06:26:00	1.93421	3301022000	0.303486	6766363	0.299967	0.00204978	0.00732492		22.2332	7.71548	0.146498		-3190	-950	10	16	-9	21
FJ@063		2022-12-20	06:30:00	1.93836	3314850000	0.30126	6791957	0.296441	0.00204895	0.00743749		21.8203	7.30841	0.14875		-3065	-696	9	15	-8	20
FJ@064		2022-12-20	06:34:00	1.93742	3302065000	0.296574	6766377	0.294346	0.00204914	0.00748663		21.912	7.39887	0.149733		-3012	-673	9	16	-8	20
FJ@065		2022-12-20	06:39:00	1.93304	3295981000	0.290485	6753133	0.290051	0.0020489	0.00881629		21.7933	7.28187	0.176326		-2950	-669	8	16	-9	22
NJU-Ba-1@016		2022-12-20	06:43:00	1.92905	3293511000	0.308396	6753443	0.303221	0.00205054	0.00690715	22.6092					-2847	741	6	16	-8	21
FJ@066		2022-12-20	06:47:00	1.92725	3287981000	0.295013	6736982	0.291089	0.00204898	0.00644064		21.8317	7.31972	0.128813		-3027	-712	9	16	-7	19
FJ@067		2022-12-20	06:52:00	1.92999	3296484000	0.290015	6754465	0.287312	0.00204899	0.00690695		21.8402	7.32808	0.138139		-2978	-637	9	16	-8	21
FJ@068		2022-12-20	06:56:00	1.93085	3296488000	0.296359	6756315	0.291615	0.00204956	0.00769343		22.12	7.60388	0.153869		-2974	-908	9	17	-7	21
FJ@069		2022-12-20	07:01:00	1.93233	3292231000	0.296936	6750427	0.294511	0.00205041	0.00756423		22.5484	8.02618	0.151285		-2916	-895	8	16	-9	21
FJ@070		2022-12-20	07:05:00	1.93053	3288143000	0.283974	6744367	0.280446	0.00205112	0.00614453		22.901	8.37376	0.122891		-2851	-877	9	16	-10	20
NJU-Ba-1@017		2022-12-20	07:09:00	1.92881	3293849000	0.292154	6753133	0.287891	0.00205023	0.00834337	22.4571					-2526	732	5	16	-9	22
FJ@071		2022-12-20	07:14:00	1.9278	3279561000	0.286659	6722688	0.284045	0.00204988	0.00748442		22.2806	7.76218	0.149688		-2771	-857	7	16	-9	18
FJ@072		2022-12-20	07:18:00	1.92748	3280925000	0.293527	6726481	0.28893	0.00205018	0.00863124		22.4332	7.91262	0.172625		-2711	-842	7	15	-12	17
FJ@073		2022-12-20	07:23:00	1.92615	3274405000	0.290295	6713669	0.287897	0.00205035	0.00691841		22.5165	7.99472	0.138368		-2716	-898	7	16	-12	21
FJ@074		2022-12-20	07:27:00	1.92279	3282683000	0.286338	6727683	0.28406	0.00204945	0.00669059		22.0671	7.55177	0.133812		-2695	-669	7	15	-7	17
FJ@075		2022-12-20	07:31:00	1.91864	3280268000	0.289125	6721802	0.286355	0.00204917	0.00507272		21.926	7.41264	0.101454		-2633	-640	7	15	-8	19
NJU-Ba-1@018		2022-12-20	07:36:00	1.91802	3271495000	0.297762	6707587	0.294166	0.00205032	0.00864153	22.5					-2582	505	5	17	-10	23
FJ@076		2022-12-20	07:40:00	1.91997	3271001000	0.298504	6701656	0.291466	0.00204882	0.00852011		21.7519	7.24106	0.170402		-2581	-607	6	15	-9	20
FJ@077		2022-12-20	07:44:00	1.9213	3264207000	0.29148	6689046	0.288452	0.00204921	0.00580231		21.9499	7.43624	0.116046		-2515	-589	7	14	-11	17
FJ@078		2022-12-20	07:49:00	1.92099	3280224000	0.290091	6721788	0.286775	0.00204919	0.00769254		21.9375	7.42395	0.153851		-2649	-684	7	15	-7	20
FJ@079		2022-12-20	07:53:00	1.92334	3281060000	0.295705	6724422	0.293566	0.00204947	0.00694194		22.0771	7.5616	0.138839		-2586	-656	6	15	-7	19
FJ@080		2022-12-20	07:58:00	1.92044	3270881000	0.295759	6703585	0.29195	0.00204948	0.00731926		22.0816	7.56602	0.146385		-2530	-631	6	15	-11	20
NJU-Ba-1@019		2022-12-20	08:02:00	1.92099	3278103000	0.275433	6720859	0.271361	0.00205023	0.00938649	22.4581					-2517	509	5	17	-11	24
FJ@081		2022-12-20	08:06:00	1.91997	3280895000	0.295444	6723371	0.292776	0.00204925	0.00687265		21.9689	7.45492	0.137453		-2566	-974	7	17	-9	22
FJ@082		2022-12-20	08:11:00	1.91958	3274167000	0.287319	6707760	0.283899	0.0020487	0.00756246		21.6916	7.18158	0.151249		-2498	-933	6	16	-9	22
FJ@083		2022-12-20	08:15:00	1.91778	3267377000	0.287514	6692976	0.284023	0.00204843	0.00777024		21.5584	7.05031	0.155405		-2456	-901	6	16	-9	20
FJ@084		2022-12-20	08:20:00	1.91974	3278156000	0.291502	6723393	0.287338	0.00205097	0.00755592		22.8271	8.301	0.151118		-2384	-644	6	15	-8	19
FJ@085		2022-12-20	08:24:00	1.91911	3268658000	0.301625	6703110	0.297471	0.00205073	0.00650043		22.705	8.18055	0.130009		-2328	-655	4	15	-9	20
NJU-Ba-1@020		2022-12-20	08:28:00	1.91817	3273359000	0.302826	6712460	0.297382	0.00205064	0.00801973	22.6611					-2156	557	4	16	-13	22
										AVE	22.461	22.0868	7.57114
										2SD	0.27475	0.619864	0.611061
Session 3		Date	Start time	Ipr (nA)	16O/Coeff	1se(%)	18O/Coeff	1se(%)	18O/16O	1se(%)	δ18O (‰, raw)		δ18O (‰, VSMOW)	2se (‰)		x-posn	y-posn	DT1 - x	DT1 - y	DTCA x	DTCA y
Sample #					L'2		H'2		H'2/L'2							(μm)	(μm)	(digits)	(digits)	(digits)	(digits)
NJU-Ba-1@021		2022-12-20	08:55:00	1.92388	3277527000	0.310436	6712251	0.305439	0.00204797	0.00922282	21.3285					-1880	1002	2	14	-10	20
FJ@091		2022-12-20	08:59:00	1.92889	3298756000	0.30224	6753126	0.299291	0.00204718	0.00644832		20.9341	7.5614	0.128966		-2182	-885	5	16	-8	20
FJ@092		2022-12-20	09:04:00	1.93092	3311592000	0.292799	6777447	0.290734	0.00204659	0.00779569		20.6388	7.27003	0.155914		-2264	-937	4	16	-4	18
FJ@093		2022-12-20	09:08:00	1.93335	3300326000	0.293304	6755293	0.289847	0.00204686	0.00795302		20.776	7.40538	0.15906		-2199	-921	5	16	-7	18
FJ@094		2022-12-20	09:12:00	1.9371	3312571000	0.318335	6779865	0.314392	0.00204671	0.0076678		20.7027	7.33303	0.153356		-2222	-963	5	16	-8	22
FJ@095		2022-12-20	09:17:00	1.93578	3293775000	0.2877	6741545	0.283602	0.00204676	0.0069723		20.7251	7.35518	0.139446		-2121	-928	6	16	-10	22
NJU-Ba-1@022		2022-12-20	09:21:00	1.93664	3307105000	0.317038	6772747	0.311456	0.00204794	0.00853273	21.3171					-1635	573	1	16	-12	22
FJ@096		2022-12-20	09:26:00	1.93703	3316512000	0.288012	6788294	0.287145	0.00204682	0.00637012		20.755	7.38471	0.127403		-1992	-965	5	16	-9	19
FJ@097		2022-12-20	09:30:00	1.93843	3310359000	0.280018	6772193	0.278681	0.00204576	0.00604692		20.2269	6.8635	0.120938		-1936	-983	4	16	-11	21
FJ@098		2022-12-20	09:34:00	1.9389	3319576000	0.299017	6794160	0.294839	0.0020467	0.00649566		20.6962	7.32663	0.129913		-1891	-940	4	16	-8	19
FJ@099		2022-12-20	09:39:00	1.9382	3310207000	0.310744	6774805	0.304831	0.00204665	0.00850884		20.6703	7.30104	0.170177		-1858	-878	4	15	-12	19
FJ@100		2022-12-20	09:43:00	1.94062	3322241000	0.296575	6802667	0.292304	0.00204762	0.00650053		21.1545	7.77894	0.130011		-1939	-616	5	15	-9	19
NJU-Ba-1@023		2022-12-20	09:48:00	1.9425	3334405000	0.313512	6827722	0.30993	0.00204766	0.00624002	21.1764					-1643	1056	1	14	-10	20
FJ@101		2022-12-20	09:52:00	1.94219	3318233000	0.299344	6792958	0.293411	0.00204717	0.00859096		20.9296	7.55697	0.171819		-1856	-599	4	15	-11	20
FJ@102		2022-12-20	09:56:00	1.94	3309852000	0.284357	6775381	0.281335	0.00204704	0.00754245		20.8648	7.49299	0.150849		-1678	-576	4	15	-11	20
FJ@103		2022-12-20	10:01:00	1.94211	3325341000	0.294434	6807835	0.29098	0.00204726	0.00585015		20.977	7.60372	0.117003		-1674	-933	3	16	-6	21
FJ@104		2022-12-20	10:05:00	1.9454	3328449000	0.303518	6814435	0.299832	0.00204733	0.0106844		21.0129	7.63916	0.213688		-1618	-920	3	16	-9	20
FJ@105		2022-12-20	10:09:00	1.94712	3332273000	0.304625	6822900	0.301392	0.00204753	0.00630343		21.1076	7.73267	0.126069		-1640	-980	3	17	-8	22
NJU-Ba-1@024		2022-12-20	10:14:00	1.94743	3342569000	0.30968	6845212	0.303074	0.0020479	0.00885526	21.2931					-1404	598	0	16	-9	21
FJ@106		2022-12-20	10:18:00	1.94696	3324672000	0.307231	6808720	0.304375	0.00204794	0.00710109		21.3151	7.93742	0.142022		-1548	-842	3	16	-11	20
FJ@107		2022-12-20	10:23:00	1.95087	3333555000	0.307586	6825167	0.303016	0.00204742	0.0078192		21.0548	7.6805	0.156384		-1423	-630	2	14	-9	18
FJ@108		2022-12-20	10:27:00	1.9551	3341108000	0.318643	6840555	0.315793	0.0020474	0.00770369		21.0428	7.66869	0.154074		-1351	-618	1	14	-10	18
FJ@109		2022-12-20	10:31:00	1.95604	3331197000	0.310908	6822151	0.307844	0.00204796	0.00612278		21.3251	7.94726	0.122456		-1279	-606	2	13	-11	17
FJ@110		2022-12-20	10:36:00	1.95776	3344391000	0.303715	6848725	0.298623	0.00204783	0.0069813		21.2597	7.88279	0.139626		-1220	-573	2	13	-9	16
NJU-Ba-1@025		2022-12-20	10:40:00	1.96308	3357844000	0.323116	6876486	0.318835	0.00204789	0.0080295	21.2906					-1260	752	0	15	-9	19
FJ@111		2022-12-20	10:44:00	1.97004	3359423000	0.307245	6879602	0.305626	0.00204785	0.00660787		21.2722	7.89509	0.132157		-1139	-565	2	13	-12	15
FJ@112		2022-12-20	10:49:00	1.97286	3412738000	0.340617	6990287	0.33673	0.0020483	0.00728379		21.4931	8.11312	0.145676		-1176	-943	21	16	-20	22
FJ@113		2022-12-20	10:53:00	1.97348	3380410000	0.299688	6918923	0.296234	0.00204677	0.00602684		20.7331	7.36305	0.120537		-1031	-902	2	17	-13	21
FJ@114		2022-12-20	10:58:00	1.97685	3396202000	0.324524	6953932	0.321024	0.00204757	0.00962512		21.1281	7.75285	0.192502		-948	-570	1	14	-9	19
FJ@115		2022-12-20	11:02:00	1.977	3385305000	0.314906	6934916	0.3122	0.00204854	0.00732132		21.6128	8.23124	0.146426		-858	-534	1	14	-10	19
NJU-Ba-1@026		2022-12-20	11:06:00	1.97747	3298525000	0.717001	6754954	0.709847	0.00204789	0.0121517	21.2906					-1253	686	1	15	-11	22
FJ@116		2022-12-20	11:11:00	1.97685	3385097000	0.299893	6928647	0.296603	0.00204681	0.00722175		20.7525	7.38225	0.144435		-786	-500	1	14	-10	17
FJ@117		2022-12-20	11:15:00	1.9752	3380952000	0.304745	6924811	0.302628	0.00204819	0.00496117		21.4373	8.058	0.0992233		-707	-464	0	14	-11	16
FJ@118		2022-12-20	11:19:00	1.96895	3376289000	0.318379	6914460	0.314776	0.00204795	0.00802683		21.3201	7.94234	0.160537		-889	-611	1	16	-10	23
FJ@119		2022-12-20	11:24:00	1.97466	3382130000	0.322578	6925516	0.318822	0.00204768	0.00735249		21.1869	7.81093	0.14705		-864	-667	1	17	-11	23
FJ@120		2022-12-20	11:28:00	1.97771	3381671000	0.300853	6924235	0.297873	0.00204758	0.00735663		21.1355	7.76023	0.147133		-782	-613	1	16	-11	23
NJU-Ba-1@027		2022-12-20	11:32:00	1.97755	3385405000	0.30553	6933836	0.302297	0.00204816	0.00611006	21.4243					-1255	583	2	17	-13	24
FJ@121		2022-12-20	11:37:00	1.97606	3383543000	0.314017	6930108	0.310533	0.00204819	0.00624794		21.4368	8.05751	0.124959		-726	-523	1	14	-13	18
FJ@122		2022-12-20	11:41:00	1.97763	3387558000	0.326283	6936017	0.323349	0.0020475	0.00776544		21.0957	7.72086	0.155309		-664	-502	0	14	-13	17
FJ@123		2022-12-20	11:46:00	1.97419	3379237000	0.310314	6918059	0.305757	0.00204723	0.00777371		20.961	7.58797	0.155474		-610	-547	0	15	-14	20
FJ@124		2022-12-20	11:50:00	1.97215	3364105000	0.314308	6890888	0.311719	0.00204836	0.00615936		21.524	8.14364	0.123187		-695	-582	1	15	-12	20
FJ@125		2022-12-20	11:54:00	1.97559	3402302000	0.320258	6965211	0.316272	0.00204721	0.00591752		20.9505	7.57764	0.11835		-559	-842	0	17	-9	22
NJU-Ba-1@028		2022-12-20	11:59:00	1.97645	3377279000	0.312134	6916188	0.307289	0.00204786	0.00688741	21.2767					-1135	667	1	16	-13	21
FJ@126		2022-12-20	12:03:00	1.97505	3397380000	0.31425	6954717	0.3125	0.00204709	0.00881798		20.8882	7.51612	0.17636		-499	-801	-1	16	-10	18
FJ@127		2022-12-20	12:08:00	1.97544	3398165000	0.314641	6958603	0.312113	0.00204776	0.00705951		21.2228	7.84636	0.14119		-515	-858	0	16	-11	20
FJ@128		2022-12-20	12:12:00	1.97661	3390316000	0.315032	6944899	0.311473	0.00204846	0.00736569		21.5724	8.19138	0.147314		-462	-863	-1	16	-13	21
FJ@129		2022-12-20	12:16:00	1.97708	3404375000	0.337281	6973617	0.332934	0.00204843	0.00758027		21.5609	8.18006	0.151605		-283	-598	-1	15	-10	19
FJ@130		2022-12-20	12:21:00	1.97661	3400832000	0.319197	6965808	0.312738	0.00204827	0.00904023		21.4811	8.10131	0.180805		-221	-575	-2	14	-11	20
NJU-Ba-1@029		2022-12-20	12:25:00	1.97536	3379465000	0.322807	6921118	0.317983	0.002048	0.00761638	21.3435					-678	1117	-3	14	-13	22
FJ@131		2022-12-20	12:30:00	1.97575	3390759000	0.308864	6944467	0.30463	0.00204806	0.00729853		21.3754	7.99697	0.145971		-142	-546	-2	14	-13	18
FJ@132		2022-12-20	12:34:00	1.97411	3392019000	0.300014	6946468	0.296438	0.00204789	0.00796936		21.2896	7.91232	0.159387		-77	-525	-2	14	-12	20
FJ@133		2022-12-20	12:38:00	1.97411	3390901000	0.314395	6946115	0.312639	0.00204846	0.00731655		21.5739	8.19285	0.146331		-237	-627	-2	15	-10	21
FJ@134		2022-12-20	12:43:00	1.97434	3391436000	0.319414	6946835	0.316132	0.00204835	0.0075062		21.5195	8.13921	0.150124		-166	-599	-2	15	-11	21
FJ@135		2022-12-20	12:47:00	1.97466	3390911000	0.299162	6945676	0.293513	0.00204833	0.0075436		21.5081	8.12789	0.150872		-90	-577	-2	14	-12	19
NJU-Ba-1@030		2022-12-20	12:51:00	1.9734	3391608000	0.302964	6946339	0.300516	0.0020481	0.00476663	21.3939					-391	572	-3	15	-10	19
FJ@136		2022-12-20	12:56:00	1.97512	3383521000	0.320852	6931756	0.315298	0.00204869	0.00890588		21.6876	8.30507	0.178118		-23	-559	-2	15	-15	19
FJ@137		2022-12-20	13:00:00	1.97403	3402382000	0.311454	6962454	0.307389	0.00204635	0.00655836		20.5226	7.15536	0.131167		-248	-922	-2	18	-10	23
FJ@138		2022-12-20	13:05:00	1.97356	3396673000	0.300584	6950412	0.299472	0.00204624	0.0059814		20.4683	7.10171	0.119628		-195	-908	-2	17	-10	21
FJ@139		2022-12-20	13:09:00	1.97708	3384555000	0.31596	6930979	0.311739	0.00204783	0.00841538		21.2602	7.88328	0.168308		-79	-855	-2	17	-15	20
FJ@140		2022-12-20	13:13:00	1.97012	3378546000	0.3042	6917088	0.300442	0.00204736	0.00672864		21.0258	7.65196	0.134573		-78	-898	-2	16	-15	21
NJU-Ba-1@031		2022-12-20	13:18:00	1.96926	3380648000	0.297727	6923745	0.296726	0.00204805	0.0049959	21.3714					-345	520	-3	16	-11	25
NJU-Ba-1@032		2022-12-20	13:22:00	1.97192	3386016000	0.309778	6934283	0.306066	0.00204792	0.00624293	21.3061					-167	859	-4	14	-10	20
										AVE	21.3177	21.1033	7.72841
										2SD	0.127458	0.684991	0.676018
Session 4		Date	Start time	Ipr (nA)	16O/Coeff	1se(%)	18O/Coeff	1se(%)	18O/16O	1se(%)	δ18O (‰, raw)		δ18O (‰, VSMOW)	2se (‰)		x-posn	y-posn	DT1 - x	DT1 - y	DTCA x	DTCA y
Sample #					L'2		H'2		H'2/L'2							(μm)	(μm)	(digits)	(digits)	(digits)	(digits)
NJU-Ba-1@01		2023-04-21	14:09:00	1.89173	2656585000	0.443665	5379753	0.437961	0.00202507	0.00831957	9.91073					-6384	75	37	20	-50	20
NJU-Ba-1@02		2023-04-21	14:15:00	1.89353	2629360000	0.482767	5325946	0.478684	0.00202557	0.00607987	10.1611					-6288	88	36	12	-54	15
FJ-G1@01		2023-04-21	14:21:00	1.89369	2647442000	0.524497	5359528	0.52007	0.00202443	0.00731582		9.58857	7.4792	0.146316		-6233	-664	40	12	-51	14
FJ-G1@02		2023-04-21	14:26:00	1.89494	2644419000	0.517966	5353789	0.514403	0.00202457	0.00735509		9.65939	7.54987	0.147102		-6154	-654	38	11	-53	13
FJ-G1@03		2023-04-21	14:32:00	1.89118	2630742000	0.508689	5326458	0.502927	0.00202471	0.00775082		9.7297	7.62004	0.155016		-6149	-711	38	13	-53	16
FJ-G1@04		2023-04-21	14:37:00	1.88751	2628656000	0.49793	5321810	0.496882	0.00202454	0.00560833		9.64393	7.53444	0.112167		-6149	-761	40	13	-53	17
FJ-G1@05		2023-04-21	14:43:00	1.8915	2630233000	0.507526	5325487	0.504694	0.00202473	0.00585022		9.73768	7.628	0.117004		-6149	-811	38	14	-52	19
NJU-Ba-1@03		2023-04-21	14:48:00	1.89502	2649375000	0.502901	5365412	0.498273	0.00202517	0.00725084	9.95961					-5993	54	37	10	-53	15
FJ-G1@06		2023-04-21	14:54:00	1.89893	2643969000	0.502378	5353862	0.497244	0.00202494	0.00793693		9.8464	7.73649	0.158739		-6149	-861	40	15	-52	20
FJ-G1@07		2023-04-21	14:59:00	1.89549	2645702000	0.49375	5355241	0.490496	0.00202413	0.00729206		9.44295	7.33388	0.145841		-6099	-861	39	15	-52	20
FJ-G1@08		2023-04-21	15:05:00	1.89228	2633391000	0.503208	5331182	0.499055	0.00202446	0.00583598		9.60702	7.49761	0.11672		-6099	-811	38	14	-51	19
FJ-G1@09		2023-04-21	15:10:00	1.89337	2637685000	0.48524	5339447	0.480679	0.0020243	0.00609632		9.52573	7.41649	0.121926		-6099	-761	39	13	-51	17
FJ-G1@10		2023-04-21	15:16:00	1.89017	2630332000	0.487395	5323748	0.483574	0.00202399	0.00750767		9.37114	7.26222	0.150153		-6099	-711	38	12	-52	15
NJU-Ba-1@04		2023-04-21	15:21:00	1.88735	2630057000	0.479994	5326654	0.476876	0.00202531	0.00590986	10.0269					-5974	-5	37	11	-53	17
FJ-G2@01		2023-04-21	15:27:00	1.88532	2634407000	0.487527	5333093	0.483425	0.00202441	0.00599331		9.5786	7.46925	0.119866		-6392	-1149	40	15	-51	16
FJ-G2@02		2023-04-21	15:32:00	1.88446	2618300000	0.396348	5299940	0.39312	0.0020242	0.00524704		9.47337	7.36424	0.104941		-6381	-1200	40	16	-53	21
FJ-G2@03		2023-04-21	15:38:00	1.88665	2621662000	0.492427	5308593	0.489509	0.0020249	0.0055621		9.82545	7.71559	0.111242		-6327	-1136	39	15	-53	16
FJ-G2@04		2023-04-21	15:43:00	1.87139	2601895000	0.482288	5271131	0.479877	0.00202589	0.00482114		10.3167	8.20578	0.0964227		-6277	-1136	38	15	-54	13
FJ-G2@05		2023-04-21	15:49:00	1.87006	2583865000	0.437141	5231349	0.434075	0.00202463	0.00523125		9.68831	7.57873	0.104625		-6277	-1186	38	16	-55	21
NJU-Ba-1@05		2023-04-21	15:55:00	1.86631	2584715000	0.407769	5235015	0.407036	0.00202538	0.00559499	10.0618					-5907	42	33	11	-54	16
FJ-G2@06		2023-04-21	16:00:00	1.86263	2594343000	0.481047	5252858	0.478757	0.00202474	0.00565519		9.74417	7.63447	0.113104		-6327	-1186	38	16	-53	19
FJ-G3@01		2023-04-21	16:06:00	1.86138	2593545000	0.48661	5253095	0.483056	0.00202546	0.00605819		10.1022	7.99179	0.121164		-6573	-1433	41	17	-52	17
FJ-G3@02		2023-04-21	16:11:00	1.86028	2582549000	0.474068	5229635	0.469857	0.002025	0.006963		9.87283	7.76287	0.13926		-6523	-1433	40	17	-52	16
FJ-G3@03		2023-04-21	16:17:00	1.85762	2578309000	0.483149	5222080	0.478411	0.0020254	0.00729187		10.0728	7.96243	0.145837		-6465	-1441	40	16	-52	15
FJ-G3@04		2023-04-21	16:22:00	1.85864	2576208000	0.481874	5216467	0.477162	0.00202487	0.00599498		9.80999	7.70016	0.1199		-6415	-1441	40	16	-52	14
NJU-Ba-1@06		2023-04-21	16:28:00	1.86192	2590663000	0.476654	5247023	0.47181	0.00202537	0.0071331	10.0578					-5553	-15	35	10	-55	15
FJ-G3@05		2023-04-21	16:33:00	1.85543	2579112000	0.47348	5221945	0.470114	0.00202471	0.00723897		9.7307	7.62103	0.144779		-6365	-1441	40	16	-54	15
FJ-G3@06		2023-04-21	16:39:00	1.85238	2562211000	0.461941	5188223	0.45848	0.00202491	0.00823075		9.82795	7.71808	0.164615		-6315	-1441	38	16	-54	16
FJ-G4@01		2023-04-21	16:44:00	1.85402	2590084000	0.489954	5244028	0.486041	0.00202466	0.00606396		9.70626	7.59665	0.121279		-6022	-1175	39	14	-52	16
FJ-G4@02		2023-04-21	16:50:00	1.85598	2577801000	0.495009	5218164	0.489967	0.00202428	0.00718576		9.51476	7.40554	0.143715		-5966	-1170	39	14	-54	16
FJ-G4@03		2023-04-21	16:55:00	1.85035	2581699000	0.479611	5227384	0.476154	0.00202479	0.0057544		9.7701	7.66035	0.115088		-6014	-1231	40	15	-52	20
NJU-Ba-1@07		2023-04-21	17:01:00	1.85175	2548790000	0.460511	5162546	0.455766	0.0020255	0.0121014	10.1227					-5494	0	34	9	-55	13
FJ-G4@04		2023-04-21	17:07:00	1.84659	2564898000	0.456884	5192973	0.45233	0.00202464	0.0069727		9.69429	7.5847	0.139454		-5955	-1217	40	15	-53	17
FJ-G5@01		2023-04-21	17:12:00	1.8426	2563941000	0.475952	5192425	0.471601	0.00202518	0.00610179		9.96459	7.85444	0.122036		-5923	-1476	40	16	-53	17
FJ-G5@02		2023-04-21	17:18:00	1.84518	2561315000	0.471786	5187348	0.466584	0.00202528	0.00790844		10.0125	7.90221	0.158169		-5923	-1526	39	17	-52	20
FJ-G5@03		2023-04-21	17:23:00	1.84471	2563475000	0.464504	5190547	0.46239	0.00202481	0.00477656		9.78107	7.6713	0.0955313		-5923	-1576	41	17	-52	23
FJ-G5@04		2023-04-21	17:29:00	1.84456	2567849000	0.467876	5199191	0.462763	0.00202474	0.00650478		9.74217	7.63248	0.130096		-5873	-1576	39	17	-53	22
NJU-Ba-1@08		2023-04-21	17:34:00	1.84933	2576787000	0.487879	5218400	0.484565	0.00202517	0.00692305	9.95661					-5129	341	32	9	-53	14
FJ-G5@05		2023-04-21	17:40:00	1.84409	2561516000	0.46196	5186748	0.460153	0.00202488	0.00573449		9.81299	7.70315	0.11469		-5873	-1526	39	16	-53	21
FJ-G6@01		2023-04-21	17:45:00	1.834	2558905000	0.476223	5180211	0.471245	0.0020244	0.00635319		9.57261	7.46327	0.127064		-5203	-1047	37	12	-53	15
FJ-G6@02		2023-04-21	17:51:00	1.82336	2536461000	0.457236	5134297	0.453002	0.0020242	0.00634199		9.47786	7.36872	0.12684		-5195	-1101	39	12	-51	17
FJ-G6@03		2023-04-21	17:56:00	1.81561	2517009000	0.456286	5094675	0.451851	0.00202411	0.00619273		9.42898	7.31995	0.123855		-5132	-1125	37	13	-53	17
FJ-G6@04		2023-04-21	18:02:00	1.81373	2500146000	0.433515	5060753	0.43137	0.00202419	0.00586416		9.46838	7.35926	0.117283		-5056	-1109	36	12	-54	17
NJU-Ba-1@09		2023-04-21	18:08:00	1.81037	2505316000	0.447306	5074262	0.444069	0.0020254	0.00745774	10.0758					-5064	364	31	10	-54	15
FJ-G7@01		2023-04-21	18:13:00	1.81381	2509340000	0.466938	5080296	0.460865	0.00202457	0.00725883		9.65789	7.54837	0.145177		-4947	-619	34	9	-55	11
FJ-G7@02		2023-04-21	18:19:00	1.81608	2515501000	0.472111	5092918	0.468024	0.00202462	0.00731634		9.68532	7.57575	0.146327		-4897	-619	33	8	-55	11
FJ-G7@03		2023-04-21	18:24:00	1.81694	2517735000	0.462715	5097743	0.458478	0.00202474	0.00539106		9.74516	7.63546	0.107821		-4847	-619	33	9	-55	10
FJ-G7@04		2023-04-21	18:30:00	1.8189	2521318000	0.463936	5103645	0.459557	0.0020242	0.00628623		9.47786	7.36872	0.125725		-4788	-608	33	8	-55	9
FJ-G7@05		2023-04-21	18:35:00	1.82062	2510036000	0.908713	5080565	0.908158	0.0020241	0.00500849		9.42599	7.31696	0.10017		-4730	-593	33	8	-55	11
NJU-Ba-1@10		2023-04-21	18:41:00	1.81827	2550895000	0.446606	5165490	0.442712	0.00202498	0.00577348	9.86336					-4611	91	32	10	-52	17
FJ-G7@06		2023-04-21	18:46:00	1.81882	2515275000	0.445153	5091520	0.442427	0.00202424	0.00570968		9.49731	7.38813	0.114194		-4667	-583	31	8	-56	10
FJ-G8@01		2023-04-21	18:52:00	1.82578	2543271000	0.489671	5149768	0.48793	0.00202486	0.00479526		9.806	7.69618	0.0959052		-4692	-1019	35	11	-53	14
FJ-G8@02		2023-04-21	18:57:00	1.83478	2547160000	0.487935	5161131	0.485554	0.00202623	0.00534541		10.4897	8.37847	0.106908		-4642	-1019	34	11	-54	14
FJ-G8@03		2023-04-21	19:03:00	1.83908	2552511000	0.478941	5167261	0.476802	0.00202439	0.00478721		9.56862	7.45929	0.0957442		-4592	-1019	33	11	-54	14
FJ-G8@04		2023-04-21	19:08:00	1.84393	2558951000	0.49891	5182218	0.495814	0.00202514	0.00750543		9.94415	7.83403	0.150109		-4542	-1019	33	11	-55	16
NJU-Ba-1@11		2023-04-21	19:14:00	1.84088	2567533000	0.525141	5199540	0.523372	0.00202512	0.00715612	9.93168					-4550	113	29	10	-55	16
FJ-G8@05		2023-04-21	19:19:00	1.83971	2548336000	0.455343	5161682	0.452427	0.00202552	0.00491421		10.1317	8.02115	0.0982843		-4492	-1019	32	11	-55	17
FJ-G9@01		2023-04-21	19:25:00	1.84143	2574002000	0.496836	5211009	0.492866	0.00202448	0.00740545		9.61749	7.50806	0.148109		-4653	-1342	37	13	-51	16
FJ-G9@02		2023-04-21	19:31:00	1.83462	2561849000	0.471854	5185338	0.468671	0.00202407	0.00544676		9.40904	7.30004	0.108935		-4645	-1391	37	14	-53	19
FJ-G9@03		2023-04-21	19:36:00	1.82508	2543528000	0.453688	5149525	0.452114	0.00202456	0.00490585		9.65639	7.54688	0.098117		-4636	-1436	38	15	-52	20
FJ-G9@04		2023-04-21	19:42:00	1.82171	2539162000	0.465903	5140198	0.462799	0.00202437	0.00479967		9.56164	7.45232	0.0959935		-4621	-1482	37	15	-53	23
NJU-Ba-1@12		2023-04-21	19:47:00	1.81905	2523060000	0.449153	5111201	0.443609	0.0020258	0.00831792	10.2753					-4190	14	28	9	-56	15
FJ-G10@01		2023-04-21	19:53:00	1.81373	2523969000	0.472222	5110726	0.469374	0.00202488	0.00543987		9.81548	7.70563	0.108797		-4221	-1307	34	11	-54	15
FJ-G10@02		2023-04-21	19:58:00	1.81561	2520248000	0.45701	5103497	0.453842	0.002025	0.00496254		9.87632	7.76635	0.0992507		-4221	-1357	36	12	-53	17
FJ-G10@03		2023-04-21	20:04:00	1.81647	2530091000	0.470525	5122546	0.464687	0.00202466	0.00655589		9.70427	7.59466	0.131118		-4194	-1412	35	13	-53	19
FJ-G10@04		2023-04-21	20:09:00	1.82164	2531747000	0.466435	5126179	0.463049	0.00202477	0.00661163		9.75763	7.64791	0.132233		-4152	-1467	33	14	-53	21
FJ-G10@05		2023-04-21	20:15:00	1.8214	2536730000	0.466174	5136507	0.4634	0.00202486	0.00684334		9.80351	7.69369	0.136867		-4109	-1529	35	15	-53	23
NJU-Ba-1@13		2023-04-21	20:20:00	1.82046	2536722000	0.466387	5137650	0.460847	0.00202532	0.00699589	10.0339					-3694	36	26	8	-55	13
FJ-G10@06		2023-04-21	20:26:00	1.81819	2521655000	0.458284	5105683	0.455149	0.00202474	0.00484749		9.74516	7.63546	0.0969497		-4040	-1511	32	14	-55	20
FJ-G11@01		2023-04-21	20:31:00	1.82343	2548957000	0.479457	5162032	0.474759	0.00202516	0.00755028		9.95562	7.84548	0.151006		-3959	-851	31	10	-53	15
FJ-G11@02		2023-04-21	20:37:00	1.82719	2553138000	0.459532	5171628	0.458418	0.0020256	0.00785748		10.1731	8.06246	0.15715		-3959	-901	32	10	-52	15
FJ-G11@03		2023-04-21	20:42:00	1.82015	2543038000	0.466905	5152012	0.464296	0.00202593	0.00510832		10.3396	8.22868	0.102166		-3959	-951	32	11	-54	17
FJ-G11@04		2023-04-21	20:48:00	1.80568	2510378000	0.447987	5085623	0.446556	0.00202584	0.00482511		10.2942	8.18339	0.0965023		-3907	-941	30	10	-53	16
NJU-Ba-1@14		2023-04-21	20:54:00	1.80959	2516916000	0.455015	5097837	0.450773	0.00202544	0.00625331	10.0923					-3741	-37	28	10	-53	18
FJ-G12@01		2023-04-21	20:59:00	1.81225	2532769000	0.467393	5127063	0.465509	0.0020243	0.00480576		9.52274	7.41351	0.0961152		-3702	-572	29	8	-54	11
FJ-G12@02		2023-04-21	21:05:00	1.81045	2519587000	0.447346	5102202	0.444223	0.00202502	0.0051653		9.8848	7.77481	0.103306		-3652	-572	26	8	-55	11
FJ-G12@03		2023-04-21	21:10:00	1.80865	2509223000	0.452351	5080928	0.449024	0.00202491	0.00618424		9.82795	7.71808	0.123685		-3652	-622	27	9	-55	13
FJ-G12@04		2023-04-21	21:16:00	1.80599	2511156000	0.462657	5085123	0.459187	0.00202502	0.00721029		9.8838	7.77381	0.144206		-3602	-622	26	9	-56	14
FJ-G12@05		2023-04-21	21:21:00	1.79778	2497475000	0.370331	5056926	0.366986	0.00202482	0.00645268		9.78456	7.67478	0.129054		-3594	-675	26	10	-56	17
NJU-Ba-1@15		2023-04-21	21:27:00	1.79089	2469518000	0.381391	5002499	0.377985	0.0020257	0.00562229	10.2254					-3669	-69	26	10	-55	20
										AVE	10.0503	9.75669	7.64697
										2SD	0.231586	0.48122	0.480214
Session 5		Date	Start time	Ipr (nA)	16O/Coeff	1se(%)	18O/Coeff	1se(%)	18O/16O	1se(%)	raw δ18O (‰)		δ18O (‰, VSMOW)	2se (‰)		x-posn	y-posn	DT1 - x	DT1 - y	DTCA x	DTCA y
Sample #					L'2		H'2		H'2/L'2							(μm)	(μm)	(digits)	(digits)	(digits)	(digits)
NJU-Ba-1@001		2023-04-21	22:45:00	1.80693	2516351000	0.459599	5096871	0.454997	0.00202551	0.00721875	10.1282					-4155	-47	33	18	-57	19
NJU-Ba-1@002		2023-04-21	22:50:00	1.80442	2496897000	0.347251	5057599	0.344708	0.00202556	0.00523075	10.1521					-4203	369	29	7	-54	10
FJ-G13@001		2023-04-21	22:56:00	1.80951	2529212000	0.466184	5120807	0.464328	0.00202467	0.00740148		9.70926	7.57423	0.14803		-3497	-1708	31	12	-53	15
FJ-G13@002		2023-04-21	23:02:00	1.79754	2558461000	0.487763	5179822	0.484988	0.00202459	0.00736237		9.66986	7.53491	0.147247		-3577	-1773	33	13	-53	18
FJ-G13@003		2023-04-21	23:07:00	1.79457	2497242000	0.440676	5056336	0.437299	0.00202477	0.00545189		9.76112	7.62598	0.109038		-3516	-1765	31	13	-53	17
FJ-G13@004		2023-04-21	23:13:00	1.77157	2451364000	0.458535	4961577	0.453899	0.00202402	0.00705378		9.3831	7.24877	0.141076		-3433	-1755	29	12	-55	18
FJ-G13@005		2023-04-21	23:18:00	1.76922	2454231000	0.437028	4968034	0.433341	0.00202428	0.00678504		9.51476	7.38015	0.135701		-3357	-1744	30	12	-55	18
NJU-Ba-1@003		2023-04-21	23:24:00	1.7668	2437345000	0.41883	4937739	0.414437	0.00202588	0.0072745	10.3112					-4114	323	28	8	-57	14
FJ-G13@006		2023-04-21	23:29:00	1.76797	2448521000	0.42788	4957441	0.425006	0.00202467	0.00501206		9.71075	7.57572	0.100241		-3272	-1732	28	13	-54	18
FJ-G13@007		2023-04-21	23:35:00	1.75991	2441215000	0.429724	4941835	0.424738	0.00202434	0.00652141		9.54618	7.4115	0.130428		-3190	-1714	27	12	-56	19
FJ-G13@008		2023-04-21	23:40:00	1.75295	2426837000	0.432268	4913081	0.428383	0.00202449	0.00711863		9.61799	7.48316	0.142373		-3105	-1643	25	11	-56	17
FJ-G13@009		2023-04-21	23:46:00	1.74833	2423368000	0.424296	4905726	0.421068	0.00202435	0.00642409		9.54917	7.41448	0.128482		-3053	-1581	25	11	-55	15
FJ-G13@010		2023-04-21	23:51:00	1.75201	2428808000	0.444893	4916567	0.442055	0.00202428	0.00677144		9.51376	7.37915	0.135429		-3123	-1587	27	11	-56	14
NJU-Ba-1@004		2023-04-21	23:57:00	1.75545	2549521000	0.378372	5162423	0.376785	0.00202486	0.00551776	9.80551					-4168	316	34	5	-57	0
FJ-G13@011		2023-04-22	00:03:00	1.76554	2444019000	0.449991	4947119	0.44868	0.00202418	0.00489152		9.4634	7.32889	0.0978303		-3419	-1691	29	12	-55	15
FJ-G13@012		2023-04-22	00:08:00	1.76961	2450498000	0.464645	4961724	0.460071	0.00202479	0.00625285		9.7696	7.63444	0.125057		-3356	-1671	28	11	-54	13
FJ-G13@013		2023-04-22	00:14:00	1.76022	2444347000	0.438851	4949519	0.434292	0.00202489	0.0073353		9.81997	7.68471	0.146706		-3278	-1642	28	11	-54	13
FJ-G13@014		2023-04-22	00:19:00	1.75091	2433163000	0.435598	4927166	0.432167	0.00202501	0.00541752		9.87931	7.74393	0.10835		-3181	-1612	28	11	-55	13
FJ-G14@001		2023-04-22	00:25:00	1.74325	2427398000	0.423007	4914565	0.420636	0.00202463	0.00805337		9.68831	7.55333	0.161067		-2724	-1596	27	13	-52	20
NJU-Ba-1@005		2023-04-22	00:30:00	1.73628	2430086000	0.437822	4922058	0.436062	0.00202547	0.00628087	10.1087					-3234	28	25	9	-54	16
FJ-G14@002		2023-04-22	00:36:00	1.72893	2481396000	0.412805	5022551	0.408993	0.00202409	0.00656874		9.42001	7.28559	0.131375		-2739	-1524	27	12	-52	18
FJ-G14@003		2023-04-22	00:41:00	1.72744	2418166000	0.453033	4895108	0.450798	0.00202431	0.0053258		9.53022	7.39557	0.106516		-2767	-1454	26	11	-52	17
FJ-G14@004		2023-04-22	00:47:00	1.72604	2413467000	0.438993	4886639	0.432713	0.00202475	0.00847027		9.74915	7.61404	0.169405		-2796	-1352	27	11	-52	17
FJ-G14@005		2023-04-22	00:52:00	1.72768	2405535000	0.42881	4870110	0.42497	0.00202455	0.00586145		9.64991	7.51501	0.117229		-2824	-1249	27	10	-51	16
FJ-G14@006		2023-04-22	00:58:00	1.72525	2398482000	0.426478	4858415	0.423129	0.00202563	0.00634625		10.1865	8.05048	0.126925		-2754	-1216	25	9	-54	15
NJU-Ba-1@006		2023-04-22	01:03:00	1.72854	2391433000	0.435111	4843496	0.432439	0.00202536	0.00654569	10.0529					-3081	93	22	8	-55	13
FJ-G14@007		2023-04-22	01:09:00	1.75545	2426948000	0.488121	4915602	0.486145	0.00202543	0.006438		10.0883	7.95244	0.12876		-2725	-1277	25	10	-53	16
FJ-G14@008		2023-04-22	01:15:00	1.76069	2444383000	0.458773	4950448	0.455893	0.00202524	0.00650472		9.99352	7.85789	0.130094		-2709	-1357	26	10	-54	16
FJ-G14@009		2023-04-22	01:20:00	1.75733	2441562000	0.4419	4945285	0.439285	0.00202546	0.00627031		10.1057	7.96986	0.125406		-2686	-1429	26	11	-54	17
FJ-G14@010		2023-04-22	01:26:00	1.75905	2441175000	0.441427	4944068	0.437764	0.00202529	0.00695779		10.018	7.88227	0.139156		-2659	-1518	25	12	-54	18
FJ-G14@011		2023-04-22	01:31:00	1.76547	2448949000	0.44714	4959181	0.446777	0.00202503	0.00588133		9.88679	7.75139	0.117627		-2637	-1594	25	13	-55	21
NJU-Ba-1@007		2023-04-22	01:37:00	1.76093	2431491000	0.383086	4924388	0.379597	0.00202526	0.00624305	10.004					-3035	48	21	9	-55	18
FJ-G14@012		2023-04-22	01:42:00	1.75334	2426443000	0.416994	4912361	0.412058	0.00202452	0.00844686		9.63445	7.49958	0.168937		-2528	-1568	25	13	-55	20
FJ-G14@013		2023-04-22	01:48:00	1.74301	2414708000	0.416477	4889952	0.414401	0.00202507	0.00519605		9.91073	7.77528	0.103921		-2563	-1485	25	13	-55	18
FJ-G14@014		2023-04-22	01:53:00	1.7366	2400292000	0.442117	4860580	0.439668	0.002025	0.00570573		9.87383	7.73845	0.114115		-2589	-1391	24	10	-55	16
FJ-G14@015		2023-04-22	01:59:00	1.74012	2405589000	0.44136	4869879	0.439013	0.00202441	0.00559167		9.5781	7.44335	0.111833		-2622	-1282	24	9	-55	15
FJ-G14@016		2023-04-22	02:04:00	1.73988	2403983000	0.416092	4867207	0.412738	0.00202465	0.00650199		9.69878	7.56378	0.13004		-2556	-1225	23	8	-56	12
NJU-Ba-1@008		2023-04-22	02:10:00	1.73722	2402078000	0.43059	4865382	0.428543	0.00202549	0.00493202	10.1197					-2972	70	20	9	-56	17
FJ-G15@001		2023-04-22	02:15:00	1.74027	2431091000	0.441499	4924511	0.440548	0.00202564	0.00490262		10.1935	8.05745	0.0980524		-2547	-688	24	8	-52	14
FJ-G15@002		2023-04-22	02:21:00	1.7434	2429440000	0.444738	4918868	0.443792	0.00202469	0.00531413		9.72172	7.58667	0.106283		-2508	-648	22	8	-53	12
FJ-G15@003		2023-04-22	02:27:00	1.74857	2425348000	0.449115	4910046	0.446228	0.00202448	0.00577323		9.61301	7.47818	0.115465		-2461	-627	20	7	-55	10
FJ-G15@004		2023-04-22	02:32:00	1.74904	2430076000	0.442096	4919688	0.439331	0.0020245	0.00666981		9.62697	7.49212	0.133396		-2398	-624	20	7	-56	11
FJ-G15@005		2023-04-22	02:38:00	1.75569	2447161000	0.44736	4958863	0.445936	0.00202638	0.00592026		10.5605	8.42371	0.118405		-2514	-733	24	9	-54	18
NJU-Ba-1@009		2023-04-22	02:43:00	1.76124	2462209000	0.457398	4986822	0.454913	0.00202535	0.00552634	10.0484					-3335	402	25	7	-52	14
FJ-G15@006		2023-04-22	02:49:00	1.76195	2448387000	0.430348	4956923	0.425824	0.00202457	0.00658866		9.66188	7.52695	0.131773		-2469	-697	23	8	-54	15
FJ-G15@007		2023-04-22	02:54:00	1.76586	2444708000	0.444423	4949022	0.439488	0.00202439	0.00684122		9.57012	7.43538	0.136824		-2403	-678	19	9	-57	14
FJ-G16@001		2023-04-22	03:00:00	1.7682	2463370000	0.441091	4985681	0.43763	0.00202393	0.00607125		9.34221	7.20796	0.121425		-1587	-1114	17	10	-54	20
FJ-G16@002		2023-04-22	03:05:00	1.77462	2462919000	0.469707	4985526	0.465617	0.00202424	0.00614425		9.49631	7.36173	0.122885		-1529	-1099	15	9	-55	15
FJ-G16@003		2023-04-22	03:11:00	1.76985	2498345000	0.41331	5057407	0.412311	0.00202431	0.00483842		9.52773	7.39308	0.0967684		-1473	-1076	19	12	-63	27
NJU-Ba-1@010		2023-04-22	03:16:00	1.76656	2461923000	0.446803	4986015	0.443035	0.00202526	0.00608246	10.003					-1862	294	15	9	-55	20
FJ-G16@004		2023-04-22	03:22:00	1.76656	2456657000	0.415828	4974193	0.409493	0.00202479	0.00928449		9.7706	7.63544	0.18569		-1611	-1175	15	13	-55	18
FJ-G16@005		2023-04-22	03:27:00	1.76625	2487902000	0.433438	5036480	0.430541	0.00202439	0.00526459		9.57161	7.43688	0.105292		-1542	-1166	14	11	-58	11
FJ-G16@006		2023-04-22	03:33:00	1.76719	2549261000	0.391849	5158814	0.390073	0.00202365	0.00561402		9.20257	7.06862	0.112281		-1457	-1132	22	10	-55	11
FJ-G16@007		2023-04-22	03:38:00	1.7668	2440693000	0.458513	4941884	0.453262	0.0020248	0.00835958		9.77259	7.63743	0.167192		-1589	-1222	18	12	-53	17
FJ-G16@008		2023-04-22	03:44:00	1.76593	2446222000	0.457931	4952602	0.455145	0.0020246	0.00652347		9.67335	7.5384	0.130469		-1540	-1235	16	13	-54	19
NJU-Ba-1@011		2023-04-22	03:50:00	1.76898	2448127000	0.43253	4958553	0.429204	0.00202545	0.00578663	10.1002					-1724	369	10	7	-58	15
										AVE	10.0758	9.71612	7.58107
										2SD	0.246881	0.50391	0.502845
Session 6		Date	Start time	Ipr (nA)	16O/Coeff	1se(%)	18O/Coeff	1se(%)	18O/16O	1se(%)	raw δ18O (‰)		δ18O (‰, VSMOW)	2se (‰)		x-posn	y-posn	DT1 - x	DT1 - y	DTCA x	DTCA y
Sample #					L'2		H'2		H'2/L'2							(μm)	(μm)	(digits)	(digits)	(digits)	(digits)
NJU-Ba-1@01		2023-08-29	20:00:00	1.98373	2720000000	0.398594	5500000	0.396209	0.00202039	0.00738285	7.5753					-6626	1051	0	4	21	58
NJU-Ba-1@02		2023-08-29	20:06:00	1.98584	2730000000	0.442267	5520000	0.444971	0.00202032	0.00708567	7.54039					-6626	1001	1	4	17	62
FJ@01		2023-08-29	20:11:00	1.97998	2710000000	0.598841	5480000	0.598908	0.00201927	0.00632307		7.01676	7.42114	0.126461		-7008	-56	-1	6	20	56
FJ@02		2023-08-29	20:17:00	1.98013	2720000000	0.586403	5480000	0.586757	0.00201923	0.0063647		6.99681	7.40118	0.127294		-7002	-188	-1	8	21	64
FJ@03		2023-08-29	20:22:00	1.97912	2720000000	0.597618	5490000	0.594476	0.00201929	0.00795863		7.02673	7.43112	0.159173		-6952	-188	0	8	19	63
FJ@04		2023-08-29	20:28:00	1.97685	2720000000	0.612136	5490000	0.613859	0.0020192	0.00757326		6.98185	7.38622	0.151465		-6902	-188	1	9	19	65
FJ@05		2023-08-29	20:33:00	1.97395	2720000000	0.600013	5480000	0.600376	0.00201914	0.0048649		6.95192	7.35628	0.097298		-6902	-238	0	9	18	67
NJU-Ba-1@03		2023-08-29	20:39:00	1.98	2690000000	0.416123	5440000	0.416643	0.00202043	0.0101072	7.59525					-6576	1001	4	4	15	62
FJ@06		2023-08-29	20:44:00	1.98	2720000000	0.621525	5490000	0.621163	0.00201922	0.0057837		6.99182	7.3962	0.115674		-6852	-238	1	9	17	66
FJ@07		2023-08-29	20:50:00	1.97	2720000000	0.592952	5490000	0.592283	0.0020192	0.00530549		6.98185	7.38622	0.10611		-6802	-238	2	9	15	67
FJ@08		2023-08-29	20:55:00	1.97	2670000000	0.372256	5390000	0.371988	0.00201912	0.00760923		6.94195	7.3463	0.152185		-6802	-188	4	9	15	66
FJ@09		2023-08-29	21:01:00	1.97	2730000000	0.616425	5510000	0.615563	0.00202024	0.00751876		7.5005	7.90508	0.150375		-6145	-179	7	7	17	63
FJ@10		2023-08-29	21:06:00	1.97	2710000000	0.607267	5480000	0.604411	0.00201987	0.00836585		7.31598	7.72048	0.167317		-6095	-179	7	7	18	62
NJU-Ba-1@04		2023-08-29	21:12:00	1.97	2720000000	0.597316	5490000	0.597753	0.0020198	0.00482315	7.28107					-5701	1262	9	4	19	63
FJ@11		2023-08-29	21:18:00	1.98	2740000000	0.619071	5530000	0.61852	0.00202003	0.00767091		7.39577	7.80031	0.153418		-6045	-179	7	7	19	64
FJ@12		2023-08-29	21:23:00	1.98	2740000000	0.61782	5530000	0.61959	0.00201967	0.00688743		7.21624	7.6207	0.137749		-5995	-179	8	7	17	63
FJ@13		2023-08-29	21:29:00	1.98	2740000000	0.613075	5530000	0.612836	0.00201984	0.0065817		7.30102	7.70552	0.131634		-5945	-179	8	7	17	64
FJ@14		2023-08-29	21:34:00	1.98	2740000000	0.605444	5540000	0.60568	0.00202095	0.00577986		7.85458	8.2593	0.115597		-5895	-179	8	7	17	64
FJ@15		2023-08-29	21:40:00	1.98	2730000000	0.61496	5520000	0.613559	0.00202062	0.00673872		7.69001	8.09466	0.134774		-5845	-179	8	7	18	65
NJU-Ba-1@05		2023-08-29	21:45:00	1.98	2700000000	0.459723	5450000	0.459795	0.00202048	0.00658982	7.62019					-5636	1225	9	4	17	63
FJ@16		2023-08-29	21:51:00	1.97583	2730000000	0.596068	5510000	0.593935	0.00201957	0.00739458		7.16637	7.57081	0.147892		-5795	-179	8	7	18	64
FJ@17		2023-08-29	21:56:00	1.97622	2740000000	0.608889	5530000	0.609039	0.00202037	0.00652158		7.56533	7.96993	0.130432		-5745	-179	11	7	16	66
FJ@18		2023-08-29	22:02:00	1.97614	2730000000	0.612048	5520000	0.61	0.00202018	0.0052923		7.47058	7.87514	0.105846		-5695	-179	10	7	16	64
FJ@19		2023-08-29	22:07:00	1.97059	2720000000	0.606166	5490000	0.604456	0.00201892	0.00668157		6.84221	7.24652	0.133631		-5231	-97	12	5	20	61
FJ@20		2023-08-29	22:13:00	2.00759	2790000000	0.604441	5630000	0.605556	0.0020192	0.00603464		6.98185	7.38622	0.120693		-5181	-97	12	5	21	60
NJU-Ba-1@06		2023-08-29	22:18:00	2.01283	2760000000	0.546327	5580000	0.545064	0.00202059	0.00824914	7.67504					-5163	1244	11	4	21	64
FJ@21		2023-08-29	22:24:00	2.01557	2780000000	0.620398	5620000	0.619415	0.00201943	0.00661971		7.09655	7.50096	0.132394		-5122	-89	11	6	21	60
FJ@22		2023-08-29	22:30:00	2.01064	2780000000	0.581596	5620000	0.582828	0.00201954	0.00979555		7.15141	7.55584	0.195911		-5072	-89	15	5	17	61
FJ@23		2023-08-29	22:35:00	1.97638	2740000000	0.61331	5530000	0.611235	0.00201952	0.00634899		7.14143	7.54587	0.12698		-5022	-89	11	5	20	63
FJ@24		2023-08-29	22:41:00	1.9709	2700000000	0.58605	5460000	0.5871	0.00201905	0.00826567		6.90704	7.31138	0.165313		-5407	-561	11	8	21	65
FJ@25		2023-08-29	22:46:00	1.96996	2710000000	0.52157	5470000	0.52073	0.00201906	0.00577352		6.91203	7.31637	0.11547		-5457	-511	10	9	22	65
NJU-Ba-1@07		2023-08-29	22:52:00	1.97028	2720000000	0.599876	5490000	0.601017	0.00202011	0.00573185	7.43567					-5083	1237	12	4	17	64
FJ@26		2023-08-29	22:57:00	1.97051	2710000000	0.560919	5470000	0.560618	0.00201871	0.0069112		6.73748	7.14175	0.138224		-5407	-511	10	8	21	64
FJ@27		2023-08-29	23:03:00	1.96582	2710000000	0.570978	5470000	0.571596	0.00201847	0.00802609		6.61779	7.02202	0.160522		-5357	-511	11	8	19	65
FJ@28		2023-08-29	23:08:00	1.96636	2720000000	0.580964	5490000	0.580585	0.00201884	0.00590379		6.80231	7.20661	0.118076		-5307	-511	11	8	16	65
FJ@29		2023-08-29	23:14:00	1.96472	2700000000	0.573121	5460000	0.572493	0.00201899	0.00922204		6.87712	7.28145	0.184441		-5307	-561	12	8	17	66
FJ@30		2023-08-29	23:19:00	1.96034	2710000000	0.580197	5460000	0.580173	0.00201878	0.00569041		6.77239	7.17668	0.113808		-5357	-561	11	8	20	66
NJU-Ba-1@08		2023-08-29	23:25:00	1.96034	2670000000	0.421424	5400000	0.421304	0.00202042	0.00587944	7.59027					-4532	808	13	5	24	64
FJ@31		2023-08-29	23:30:00	1.9576	2700000000	0.570044	5460000	0.571786	0.00201905	0.00680793		6.90704	7.31138	0.136159		-5257	-511	13	8	14	67
FJ@32		2023-08-29	23:36:00	1.95643	2700000000	0.601816	5450000	0.603853	0.00202023	0.00701431		7.49551	7.90009	0.140286		-3824	-1238	17	11	24	68
FJ@33		2023-08-29	23:41:00	1.95486	2700000000	0.585797	5440000	0.586408	0.0020194	0.00821526		7.08159	7.486	0.164305		-3774	-1238	15	11	26	70
FJ@34		2023-08-29	23:47:00	1.95189	2690000000	0.603446	5440000	0.602673	0.00201923	0.00846025		6.99681	7.40118	0.169205		-3724	-1238	16	11	23	70
FJ@35		2023-08-29	23:52:00	1.95322	2700000000	0.617067	5450000	0.618404	0.00201912	0.00758845		6.94195	7.3463	0.151769		-3623	-1215	18	11	21	69
NJU-Ba-1@09		2023-08-29	23:58:00	1.95463	2700000000	0.601893	5450000	0.600118	0.00202033	0.00828798	7.54538					-4423	795	14	5	20	68
										AVE	7.53984	7.10367	7.50809
										2SD	0.233936	0.566699	0.566926

## Sheet: Table S3
Table S3. Summary of SIMS results for the oxygen isotope values of NJU-Ba-1-1. * is δ18O relative to the mean of NJU-Ba-1 in each session. The data marked with a strikethrough line was removed from the statistics because it exhibited significant deviation due to insufficient charge compensation in the testing process.
General Table	Summary of oxygen isotope values of NJU-Ba-1 barite measured by SIMS in 12 sessions over the last ten month. M is number of fragments, N is number of spots, Del is number of rejected spots.
	NJU-Ba-1	Date	δ18O (‰, raw)	2SD	M	N	Del
	Session 1	2022-11-08	24.79	0.47	5	20	0
	Session 2	2022-11-09	25.01	0.43	7	28	0
	Session 3	2022-11-09	26.32	0.27	3	14	0
	Session 4	2022-11-29	28.18	0.33	6	28	1
	Session 5	2022-11-30	26.12	0.53	23	54	1
	Session 6	2023-04-20	9.31	0.3	18	41	2
	Session 7	2023-04-20	9.46	0.32	32	80	4
	Session 8	2023-04-21	9.41	0.41	12	28	2
	Session 9	2023-08-21	7.53	0.28	40	90	0
	Mean			0.36	146	383	10
Details
Session 1		Date	Start time	Ipr (nA)	16O/Coeff	1se(%)	18O/Coeff	1se(%)	18O/16O	1se(%)			δ18O (‰, raw)	δ18O* (‰)	δ18O (‰, VSMOW)	2se (‰)			x-posn	y-posn	DTFA x	DTFAy	DTCA x	DTCA y
Sample #					L'2		H'2		H'2/L'2										(μm)	(μm)	(digits)	(digits)	(digits)	(digits)
NJU-Ba-1-1@01		2022-11-08	21:17:00	1.01429	1751233000	0.175424	3598490	0.169582	0.00205484	0.0146126			24.7536	-0.0330186	7.90698	0.292252			315	779	66	26	22	32
NJU-Ba-1-1@02		2022-11-08	21:23:00	1.0135	1761968000	0.23393	3620543	0.224934	0.00205484	0.0178354			24.7546	-0.0320453	7.90795	0.356707			361	838	69	21	17	25
NJU-Ba-1-1@03		2022-11-08	21:28:00	1.01038	1816285000	0.26984	3730225	0.259883	0.00205378	0.0122959			24.2255	-0.548371	7.39163	0.245918			303	718	68	21	20	33
NJU-Ba-1-1@04		2022-11-08	21:33:00	1.01202	1746078000	0.384642	3587449	0.373885	0.00205459	0.0168786			24.632	-0.151759	7.78824	0.337572			389	678	70	24	18	38
NJU-Ba-1-2@01		2022-11-08	21:38:00	1.011	1732213000	0.166073	3558651	0.161997	0.0020544	0.0112519			24.5357	-0.245681	7.69432	0.225038			750	1038	67	21	24	27
NJU-Ba-1-2@02		2022-11-08	21:44:00	1.01217	1743405000	0.491372	3581647	0.481527	0.00205442	0.0135011			24.5447	-0.236921	7.70308	0.270022			811	952	72	26	19	34
NJU-Ba-1-2@03		2022-11-08	21:49:00	1.01335	1760635000	0.212962	3618268	0.211956	0.00205509	0.0106026			24.8823	0.0925347	8.03253	0.212051			848	801	73	24	21	36
NJU-Ba-1-3@01		2022-11-08	21:54:00	1.01225	1759255000	0.31265	3616462	0.305722	0.00205569	0.01476			25.1775	0.380626	8.32063	0.2952			1040	1940	75	27	19	30
NJU-Ba-1-3@02		2022-11-08	21:59:00	1.01155	1741085000	0.215905	3578840	0.214597	0.00205552	0.0116392			25.0967	0.30179	8.24179	0.232784			1072	1788	78	27	18	34
NJU-Ba-1-3@03		2022-11-08	22:05:00	1.01131	1753888000	0.318626	3603895	0.313813	0.00205481	0.00996001			24.7402	-0.0461579	7.89384	0.1992			1155	1662	74	25	16	33
NJU-Ba-1-4@01		2022-11-08	22:10:00	1.00944	1732698000	0.324572	3560638	0.31665	0.00205498	0.0148047			24.8245	0.0360844	7.97608	0.296093			-450	1250	60	21	19	31
NJU-Ba-1-4@02		2022-11-08	22:15:00	1.01202	1774456000	0.352222	3646022	0.348867	0.00205473	0.0117389			24.7013	-0.0841159	7.85588	0.234779			-551	1170	63	22	14	39
NJU-Ba-1-4@03		2022-11-08	22:20:00	1.01241	1756142000	0.247507	3608940	0.238222	0.00205505	0.0154343			24.8599	0.0706359	8.01064	0.308686			-740	1272	57	28	15	34
NJU-Ba-1-5@01		2022-11-08	22:26:00	1.01491	1776646000	0.325274	3651542	0.315892	0.00205531	0.0139453			24.992	0.199596	8.1396	0.278906			-1293	893	55	18	18	36
NJU-Ba-1-5@02		2022-11-08	22:31:00	1.01382	1753801000	0.311115	3604406	0.303357	0.00205521	0.0118726			24.9382	0.147039	8.08704	0.237452			-1330	1020	55	23	14	28
NJU-Ba-1-5@03		2022-11-08	22:36:00	1.01499	1797341000	0.333185	3692474	0.323443	0.00205442	0.015692			24.5477	-0.234001	7.706	0.313839			-1277	1225	55	19	18	25
NJU-Ba-1-5@04		2022-11-08	22:41:00	1.01178	1758436000	0.186129	3613043	0.179817	0.0020547	0.0132585			24.6838	-0.101148	7.83885	0.265171			-1464	1239	56	23	15	24
NJU-Ba-1-5@05		2022-11-08	22:47:00	1.00967	1703611000	0.301609	3500409	0.290793	0.00205471	0.0156554			24.6923	-0.0928754	7.84712	0.313108			-1396	1481	56	16	21	34
NJU-Ba-1-5@06		2022-11-08	22:52:00	1.01084	1718857000	0.223386	3533381	0.229345	0.00205565	0.015016			25.1611	0.364567	8.30457	0.300321			-1572	1610	54	15	15	33
NJU-Ba-1-5@07		2022-11-08	22:57:00	1.00975	1755154000	0.237351	3607436	0.234411	0.00205534	0.00922546			25.006	0.213222	8.15322	0.184509			-1464	1741	51	17	16	33
												AVE	24.7875	0	7.94
												2SD	0.473907	0.462444	0.462444
Session 2		Date	Start time	Ipr (nA)	16O/Coeff	1se(%)	18O/Coeff	1se(%)	18O/16O	1se(%)			δ18O (‰, raw)	δ18O* (‰)	δ18O (‰, VSMOW)	2se (‰)			x-posn	y-posn	DTFA x	DTFAy	DTCA x	DTCA y
Sample #					L'2		H'2		H'2/L'2										(μm)	(μm)	(digits)	(digits)	(digits)	(digits)
NJU-Ba-1-6@01		2022-11-09	10:58:00	1.04276	1840039000	0.241788	3782867	0.232365	0.00205587	0.0151441			25.2703	0.249783	8.18978	0.302883			-2325	766	50	15	12	32
NJU-Ba-1-6@02		2022-11-09	11:04:00	1.04198	1853922000	0.240648	3810484	0.230195	0.00205537	0.018344			25.0219	0.00748913	7.94749	0.36688			-2301	874	45	17	15	31
NJU-Ba-1-6@03		2022-11-09	11:09:00	1.04026	1826801000	0.222592	3754840	0.218088	0.00205542	0.0140831			25.0464	0.0313293	7.97133	0.281661			-2228	875	50	21	10	30
NJU-Ba-1-6@04		2022-11-09	11:15:00	1.03901	1830815000	0.263861	3763621	0.259072	0.00205571	0.018114			25.1915	0.17291	8.11291	0.362281			-2228	875	50	21	10	30
NJU-Ba-1-6@05		2022-11-09	11:20:00	1.03697	1829861000	0.23191	3761635	0.226017	0.0020557	0.0138484			25.1845	0.166099	8.1061	0.276968			-2353	1071	48	18	16	27
NJU-Ba-1-6@06		2022-11-09	11:26:00	1.03893	1827249000	0.218217	3755395	0.211833	0.00205522	0.0165689			24.9466	-0.0659774	7.87402	0.331377			-2220	1086	54	16	7	26
NJU-Ba-1-6@07		2022-11-09	11:31:00	1.03674	1840335000	0.295984	3782356	0.286564	0.00205527	0.0133769			24.9676	-0.045543	7.89446	0.267538			-3555	301	44	11	8	24
NJU-Ba-1-7@01		2022-11-09	11:37:00	1.03752	1800932000	0.457114	3701838	0.444698	0.00205553	0.0179159			25.1017	0.0853344	8.02533	0.358317			-3342	227	42	18	12	30
NJU-Ba-1-7@02		2022-11-09	11:42:00	1.03901	1824135000	0.284909	3750342	0.277503	0.00205596	0.0144039			25.3167	0.29503	8.23503	0.288078			-3123	299	44	19	12	29
NJU-Ba-1-7@03		2022-11-09	11:48:00	1.03838	1783383000	0.406855	3666815	0.396116	0.00205612	0.0155026			25.3935	0.369956	8.30996	0.310052			-3020	31	45	18	9	29
NJU-Ba-1-8@01		2022-11-09	11:53:00	1.03752	1829394000	0.207061	3760282	0.198908	0.00205549	0.0113891			25.0783	0.0624674	8.00247	0.227782			-3874	-1140	37	15	13	22
NJU-Ba-1-8@02		2022-11-09	11:59:00	1.04057	1823672000	0.240617	3748262	0.232192	0.00205535	0.0133601			25.008	-0.00613379	7.93387	0.267203			-3836	-1364	44	14	6	26
NJU-Ba-1-8@03		2022-11-09	12:04:00	1.03956	1827938000	0.18467	3758051	0.185118	0.0020559	0.015342			25.2823	0.261459	8.20146	0.306841			-3796	-1469	47	15	4	29
NJU-Ba-1-9@01		2022-11-09	12:10:00	1.03971	1832924000	0.337568	3766666	0.327347	0.00205502	0.0141555			24.8439	-0.166203	7.7738	0.28311			-4266	-1789	37	14	9	26
NJU-Ba-1-9@02		2022-11-09	12:15:00	1.03823	1877061000	0.424414	3856642	0.414362	0.00205463	0.0177916			24.6529	-0.352545	7.58745	0.355832			-4151	-1882	42	13	1	23
NJU-Ba-1-9@03		2022-11-09	12:21:00	1.03619	1836476000	0.341724	3774266	0.332168	0.00205518	0.0139098			24.9257	-0.0864118	7.85359	0.278195			-4119	-1624	41	13	3	20
NJU-Ba-1-10@01		2022-11-09	12:26:00	1.02242	1838277000	1.26485	3779002	1.25956	0.00205576	0.0153167			25.2159	0.196751	8.13675	0.306334			-5444	-189	35	11	0	24
NJU-Ba-1-10@02		2022-11-09	12:32:00	1.02719	1796668000	0.715866	3693633	0.706072	0.00205585	0.0126235			25.2603	0.240052	8.18005	0.252469			-5423	46	31	8	-3	13
NJU-Ba-1-10@03		2022-11-09	12:37:00	1.02806	1855141000	0.331066	3812471	0.32011	0.0020551	0.0161785			24.8848	-0.126307	7.81369	0.32357			-5325	-261	34	12	-2	24
NJU-Ba-1-11@01		2022-11-09	12:43:00	1.02759	1820299000	0.352065	3739798	0.3459	0.0020545	0.00983685			24.5881	-0.415795	7.52421	0.196737			-6082	2077	24	2	-4	16
NJU-Ba-1-11@02		2022-11-09	12:49:00	1.0268	1813631000	0.467423	3726857	0.459751	0.00205493	0.0139836			24.7995	-0.209505	7.7305	0.279673			-6088	1739	33	5	-6	17
NJU-Ba-1-11@03		2022-11-09	12:54:00	1.02845	1833766000	0.221159	3769055	0.217405	0.00205537	0.0112338			25.018	0.00359687	7.9436	0.224676			-6188	1468	32	6	-6	18
NJU-Ba-1-11@04		2022-11-09	13:00:00	1.02766	1855442000	0.184285	3811830	0.172075	0.00205441	0.0164561			24.5432	-0.459583	7.48042	0.329122			-6460	1448	24	2	1	13
NJU-Ba-1-11@05		2022-11-09	13:05:00	1.0286	1845978000	0.491026	3793426	0.473477	0.002055	0.0212209			24.8369	-0.173015	7.76699	0.424418			-6152	920	32	9	-2	18
NJU-Ba-1-12@01		2022-11-09	13:11:00	1.0261	1791384000	0.175254	3681937	0.174613	0.00205536	0.0100494			25.0145	0.000191138	7.94019	0.200989			-4523	3995	36	2	3	14
NJU-Ba-1-12@02		2022-11-09	13:16:00	1.0279	1836113000	0.312227	3773683	0.306316	0.00205527	0.0157542			24.9676	-0.045543	7.89446	0.315084			-4661	3775	31	3	5	18
NJU-Ba-1-12@03		2022-11-09	13:22:00	1.02782	1812811000	0.285616	3725698	0.27677	0.00205521	0.0138432			24.9426	-0.0698696	7.87013	0.276864			-4412	3571	39	6	3	21
NJU-Ba-1-12@04		2022-11-09	13:27:00	1.02727	1828913000	0.306615	3759368	0.304142	0.00205552	0.00947051			25.0962	0.0799826	8.01998	0.18941			-4244	3424	40	9	3	22
												AVE	25.0143	0	7.94
												2SD	0.42744	0.42	0.417008
													0.351642
Session 3		Date	Start time	Ipr (nA)	16O/Coeff	1se(%)	18O/Coeff	1se(%)	18O/16O	1se(%)			δ18O (‰, raw)	δ18O* (‰)	δ18O (‰, VSMOW)	2se (‰)			x-posn	y-posn	DTFA x	DTFAy	DTCA x	DTCA y
Sample #					L'2		H'2		H'2/L'2										(μm)	(μm)	(digits)	(digits)	(digits)	(digits)
NJU-Ba-1-std@09		2022-11-09	19:22:00	2.02441	3111591000	0.458339	6403644	0.455332	0.002058	0.00650693		26.3325	26.3325	0.0144733	7.95447	0.130139			-521	1268	79	37	5	39
NJU-Ba-1-std@10		2022-11-09	19:28:00	2.02011	3141137000	0.5366	6464405	0.532404	0.00205799	0.00710326		26.327	26.327	0.00912826	7.94913	0.142065			-466	1201	79	35	5	43
NJU-Ba-1-19@01		2022-11-09	19:33:00	2.01401	3104019000	0.506992	6389450	0.503007	0.00205845	0.0076867			26.557	0.233135	8.17314	0.153734			321	1726	86	32	9	36
NJU-Ba-1-19@02		2022-11-09	19:39:00	2.01839	3132915000	0.543168	6447376	0.540735	0.00205795	0.00748955			26.3081	-0.00933651	7.93066	0.149791			334	1669	83	36	10	40
NJU-Ba-1-19@03		2022-11-09	19:44:00	2.01761	3128335000	0.525625	6438415	0.521622	0.0020581	0.00771334			26.3834	0.0640367	8.00404	0.154267			399	1608	82	42	8	43
NJU-Ba-1-19@04		2022-11-09	19:50:00	2.02152	3137896000	0.529536	6457798	0.525986	0.00205801	0.00598489			26.3365	0.0183607	7.95836	0.119698			430	1703	82	42	6	43
NJU-Ba-1-20@01		2022-11-09	19:55:00	2.01479	3115683000	0.537299	6411352	0.53438	0.00205777	0.0065721			26.2188	-0.0963153	7.84368	0.131442			938	1664	86	41	15	41
NJU-Ba-1-std@10		2022-11-09	20:01:00	2.01612	3141285000	0.550842	6465384	0.547439	0.0020582	0.00899131		26.4333	26.4333	0.112628	8.05263	0.179826			-246	1192	75	42	5	47
NJU-Ba-1-20@02		2022-11-09	20:06:00	2.01142	3123029000	0.528096	6425934	0.523521	0.00205761	0.00661821			26.135	-0.177949	7.76205	0.132364			966	1552	87	44	15	45
NJU-Ba-1-20@03		2022-11-09	20:12:00	2.00955	3103889000	0.532438	6387924	0.531072	0.00205804	0.00644336			26.352	0.033424	7.97342	0.128867			1036	1499	91	47	12	46
NJU-Ba-1-21@01		2022-11-09	20:17:00	2.01049	3131459000	0.523606	6443921	0.52094	0.00205781	0.00646308			26.2353	-0.0802801	7.85972	0.129262			-953	-73	72	37	14	39
NJU-Ba-1-21@02		2022-11-09	20:23:00	2.00704	3116910000	0.542683	6414562	0.538258	0.002058	0.00671965			26.33	0.0120438	7.95204	0.134393			-881	-104	77	35	11	39
NJU-Ba-1-21@03		2022-11-09	20:28:00	2.00384	3157894000	0.597027	6496923	0.593866	0.00205737	0.00627897			26.0159	-0.294083	7.64592	0.125579			-397	108	78	36	8	35
NJU-Ba-1-std@10		2022-11-09	20:34:00	2.00689	3134641000	0.550118	6452018	0.546593	0.0020583	0.00801028		26.4826	26.4826	0.160734	8.10073	0.160206			-278	1133	79	34	5	45
											AVE	26.3939	26.3177	0	7.94
											2SD	0.153452	0.274697	0.27	0.267653
Session 4		Date	Start time	Ipr (nA)	16O/Coeff	1se(%)	18O/Coeff	1se(%)	18O/16O	1se(%)			δ18O (‰, raw)	δ18O* (‰)	δ18O (‰, VSMOW)	2se (‰)			x-posn	y-posn	DTFA x	DTFAy	DTCA x	DTCA y
Sample #					L'2		H'2		H'2/L'2										(μm)	(μm)	(digits)	(digits)	(digits)	(digits)
NJU-Ba-1-22@01		2022-11-29	11:06:00	2.01565	2880280000	0.637185	5939916	0.631671	0.00206228	0.00822972			28.468	0.319859	8.25986	0.164594			-733	1442	24	32	8	-13
NJU-Ba-1-22@02		2022-11-29	11:11:00	2.01479	2904383000	0.545379	5987072	0.538702	0.00206141	0.00961764			28.0301	-0.106019	7.83398	0.192353			-686	1459	22	33	12	-10
NJU-Ba-1-22@03		2022-11-29	11:16:00	2.01197	2874209000	0.614655	5925881	0.612806	0.00206175	0.00679658			28.2007	0.0598696	7.99987	0.135932			-635	1485	24	32	11	-12
NJU-Ba-1-22@04		2022-11-29	11:21:00	2.01463	2867414000	0.574917	5910616	0.567958	0.00206132	0.00921955			27.9877	-0.147249	7.79275	0.184391			-592	1482	24	32	14	-14
NJU-Ba-1-22@05		2022-11-29	11:27:00	2.01667	2849945000	0.651077	5876680	0.647681	0.00206204	0.00839848			28.3473	0.202476	8.14248	0.16797			-718	1401	29	33	12	-16
NJU-Ba-1-23@01		2022-11-29	11:32:00	2.01268	2918168000	0.569218	6015494	0.565422	0.0020614	0.0092627			28.0281	-0.107959	7.83204	0.185254			-1216	1347	18	32	12	-7
NJU-Ba-1-23@02		2022-11-29	11:37:00	2.01088	2732171000	0.655912	5640934	0.65244	0.00206464	0.00857292			29.6444	1.4641	9.4041	0.171458			-1165	1379	22	33	-75	-11
NJU-Ba-1-23@03		2022-11-29	11:42:00	2.01275	2884938000	0.582951	5946818	0.579261	0.00206134	0.00739731			27.9977	-0.137548	7.80245	0.147946			-1096	1431	18	32	14	-11
NJU-Ba-1-23@04		2022-11-29	11:48:00	2.01526	2898741000	0.627089	5976247	0.62268	0.00206168	0.0082083			28.1673	0.0273709	7.96737	0.164166			-1029	1490	18	32	15	-12
NJU-Ba-1-23@05		2022-11-29	11:53:00	2.01174	2882343000	0.570944	5941261	0.568558	0.00206127	0.00670085			27.9603	-0.173927	7.76607	0.134017			-668	1420	24	33	13	-12
NJU-Ba-1-23@06		2022-11-29	11:58:00	2.01588	2934962000	0.576485	6048954	0.574628	0.002061	0.00746787			27.8296	-0.301011	7.63899	0.149357			-618	1396	24	34	16	-13
NJU-Ba-1-23@07		2022-11-29	12:03:00	2.00673	2862878000	0.615915	5903404	0.614015	0.00206206	0.00783077			28.3548	0.209751	8.14975	0.156615			-664	1317	25	33	17	-13
NJU-Ba-1-24@01		2022-11-29	13:27:00	2.01111	2907317000	0.531315	5993154	0.529843	0.00206141	0.00557008			28.0306	-0.105534	7.83447	0.111402			-3273	1774	1	31	14	-19
NJU-Ba-1-24@02		2022-11-29	13:32:00	2.00696	2926958000	0.532361	6033761	0.526791	0.00206146	0.010672			28.0551	-0.0817663	7.85823	0.213439			-3250	1734	2	30	16	-22
NJU-Ba-1-24@03		2022-11-29	13:37:00	2.00532	2932340000	0.599413	6044614	0.597457	0.00206137	0.00607915			28.0107	-0.124936	7.81506	0.121583			-3197	1814	2	32	12	-23
NJU-Ba-1-24@04		2022-11-29	13:42:00	2.00532	2862135000	0.557727	5902137	0.553399	0.00206215	0.00776139			28.4037	0.257287	8.19729	0.155228			-3167	1769	4	30	15	-27
NJU-Ba-1-24@05		2022-11-29	13:48:00	2.00438	2891880000	0.494532	5962328	0.490504	0.00206176	0.00977482			28.2047	0.06375	8.00375	0.195496			-2861	1583	5	31	20	-23
NJU-Ba-1-24@06		2022-11-29	13:53:00	2.00305	2908139000	0.54923	5995867	0.545901	0.00206176	0.00685721			28.2072	0.0661753	8.00618	0.137144			-2657	1783	7	32	13	-21
NJU-Ba-1-24@07		2022-11-29	13:58:00	2.00485	2875848000	0.657434	5929235	0.652981	0.00206175	0.00750574			28.1997	0.0588995	7.9989	0.150115			-2592	1731	7	31	12	-27
NJU-Ba-1-24@08		2022-11-29	14:03:00	2.0083	2894281000	0.557329	5965387	0.553272	0.0020611	0.00851866			27.8795	-0.252505	7.68749	0.170373			-3275	1473	3	31	10	-24
NJU-Ba-1-24@09		2022-11-29	14:09:00	2.00337	2896110000	0.53356	5971691	0.530247	0.00206198	0.00751069			28.3144	0.170462	8.11046	0.150214			-3306	1408	6	32	17	-20
NJU-Ba-1-25@01		2022-11-29	14:14:00	2.00673	2918821000	0.745066	6017099	0.73948	0.0020615	0.00843142			28.0765	-0.060909	7.87909	0.168628			-3121	1829	3	30	11	-25
NJU-Ba-1-25@02		2022-11-29	14:19:00	1.99946	2895498000	0.603751	5969928	0.600678	0.0020618	0.00691016			28.2286	0.0870326	8.02703	0.138203			-2985	1391	3	32	11	-19
NJU-Ba-1-25@03		2022-11-29	14:25:00	2.00258	2870737000	0.605805	5918705	0.598459	0.00206176	0.0106849			28.2042	0.0632649	8.00326	0.213698			-2820	1291	9	31	15	-28
NJU-Ba-1-26@01		2022-11-29	14:30:00	1.9982	2869277000	0.544061	5916129	0.541864	0.00206189	0.00721406			28.273	0.130202	8.0702	0.144281			-3159	1058	6	32	13	-20
NJU-Ba-1-26@02		2022-11-29	14:35:00	1.99938	2852850000	0.592451	5882265	0.591374	0.00206189	0.00739177			28.273	0.130202	8.0702	0.147835			-2816	1137	11	32	13	-29
NJU-Ba-1-27@01		2022-11-29	14:40:00	2.00423	2900669000	0.656504	5978817	0.653216	0.00206119	0.00829712			27.9244	-0.208851	7.73115	0.165942			-3363	883	1	34	14	-20
NJU-Ba-1-27@02		2022-11-29	14:46:00	2.00094	2889315000	0.555241	5956851	0.551397	0.00206169	0.00804144			28.1723	0.0322215	7.97222	0.160829			-2933	871	6	33	14	-19
NJU-Ba-1-27@03		2022-11-29	14:51:00	2.00188	2880282000	0.488904	5937620	0.485106	0.00206148	0.00887151			28.0665	-0.0706101	7.86939	0.17743			-3118	1780	3	30	17	-24
												AVE	28.1391	0	7.94
												2SD	0.326132	0.32	0.317206
Session 5		Date	Start time	Ipr (nA)	16O/Coeff	1se(%)	18O/Coeff	1se(%)	18O/16O	1se(%)			δ18O (‰, raw)	δ18O* (‰)	δ18O (‰, VSMOW)	2se (‰)			x-posn	y-posn	DTFA x	DTFAy	DTCA x	DTCA y
Sample #					L'2		H'2		H'2/L'2										(μm)	(μm)	(digits)	(digits)	(digits)	(digits)
NJU-Ba-1-std@17		2022-11-30	18:30:00	2.00767	2748736000	0.269313	5658387	0.260714	0.00205855	0.01001		26.6063	26.6063	0.445414	8.38541	0.2002			-3822	1113	-19	21	6	9
NJU-Ba-1@17		2022-11-30	18:35:00	2.00337	2756255000	0.26266	5672523	0.25802	0.00205806	0.00893757			26.3615	0.206791	8.14679	0.178751			-3990	-1046	-11	21	13	7
NJU-Ba-1@18		2022-11-30	18:41:00	2.00696	2742711000	0.284203	5644965	0.28461	0.00205817	0.00472718			26.4158	0.259764	8.19976	0.0945435			-3944	-1289	-13	22	15	8
NJU-Ba-1@19		2022-11-30	18:46:00	2.0043	2742504000	0.265709	5644461	0.265004	0.00205814	0.00758817			26.4024	0.246642	8.18664	0.151763			-3716	-1214	-15	21	13	5
NJU-Ba-1@20		2022-11-30	18:51:00	1.99946	2743873000	0.286146	5645533	0.274749	0.00205752	0.0140851			26.0912	-0.0566184	7.88338	0.281701			-3740	-1028	-15	20	14	2
NJU-Ba-1@21		2022-11-30	18:56:00	1.99836	2738681000	0.263471	5635903	0.257112	0.0020579	0.010094			26.2797	0.127088	8.06709	0.201879			-3725	-750	-12	19	14	4
NJU-Ba-1-std@18		2022-11-30	19:02:00	1.99797	2730945000	0.269734	5618723	0.265657	0.00205743	0.00848858		26.0488	26.0488	-0.097928	7.84207	0.169772			-3411	1166	-20	21	9	7
NJU-Ba-1@22		2022-11-30	19:07:00	2.00517	2709629000	0.274278	5572841	0.268663	0.00205669	0.00943276			25.6762	-0.460966	7.47903	0.188655			-3680	-431	-15	19	13	7
NJU-Ba-1@23		2022-11-30	19:12:00	2.00571	2743889000	0.274158	5646872	0.268583	0.00205799	0.00975647			26.3251	0.171313	8.11131	0.195129			-3847	-389	-16	19	12	3
NJU-Ba-1@24		2022-11-30	19:18:00	2.00071	2745936000	0.272217	5650262	0.265725	0.00205769	0.00867292			26.1759	0.0260007	7.966	0.173458			-3401	-423	-8	19	17	4
NJU-Ba-1@25		2022-11-30	19:23:00	2.00063	2751657000	0.285505	5661173	0.282697	0.00205737	0.00639814			26.0184	-0.127574	7.81243	0.127963			-3400	-685	-8	20	12	5
NJU-Ba-1@26		2022-11-30	19:28:00	1.99883	2766154000	0.29089	5689458	0.283073	0.00205682	0.00958446			25.7431	-0.395843	7.54416	0.191689			-3415	-963	-12	20	16	3
NJU-Ba-1-std@19		2022-11-30	19:33:00	1.99742	2739436000	0.256425	5635450	0.252955	0.00205716	0.0085361		25.9131	25.9131	-0.230119	7.70988	0.170722			-2520	809	-8	23	14	8
NJU-Ba-1@27		2022-11-30	19:39:00	1.99883	2750404000	0.283267	5659625	0.279533	0.00205775	0.00928064			26.2054	0.0546744	7.99467	0.185613			-3203	-1005	-10	21	18	4
NJU-Ba-1@28		2022-11-30	19:44:00	1.99351	2736304000	0.294063	5628641	0.294399	0.00205702	0.0085517			25.8443	-0.297186	7.64281	0.171034			-3080	-1349	-9	23	19	5
NJU-Ba-1@29		2022-11-30	19:49:00	1.99406	2739020000	0.273622	5637566	0.274464	0.00205824	0.00933468			26.4517	0.294756	8.23476	0.186694			-2875	-990	-6	21	21	2
NJU-Ba-1@30		2022-11-30	19:54:00	1.99414	2765020000	0.306368	5690566	0.30091	0.00205806	0.0105322			26.363	0.208249	8.14825	0.210644			-2830	-712	-7	19	16	6
NJU-Ba-1@31		2022-11-30	20:00:00	1.99085	2751173000	0.28529	5661475	0.278117	0.00205785	0.00948051			26.2562	0.104246	8.04425	0.18961			-2892	-336	-18	19	21	3
NJU-Ba-1-std@20		2022-11-30	20:05:00	1.98444	2733411000	0.27904	5624337	0.274752	0.00205763	0.00799008		26.1475	26.1475	-0.00170098	7.9383	0.159802			-2313	1704	-12	19	17	8
NJU-Ba-1@32		2022-11-30	20:10:00	1.98099	2740462000	0.284114	5636112	0.273551	0.00205664	0.0148267			25.6533	-0.483322	7.45668	0.296535			-2698	-396	-9	19	21	9
NJU-Ba-1@33		2022-11-30	20:16:00	1.98052	2739776000	0.273459	5638379	0.269804	0.00205798	0.00764962			26.3191	0.165481	8.10548	0.152992			-2602	-749	-4	19	21	6
NJU-Ba-1@34		2022-11-30	20:21:00	1.98663	2767036000	0.315122	5694914	0.312544	0.00205813	0.00658694			26.3969	0.241296	8.1813	0.131739			-2334	-804	-1	20	21	5
NJU-Ba-1@35		2022-11-30	20:26:00	1.98616	2754494000	0.265094	5666362	0.256958	0.00205714	0.0131647			25.9037	-0.239353	7.70065	0.263294			-2333	-1071	-6	22	22	9
NJU-Ba-1@36		2022-11-30	20:31:00	1.9867	2698722000	0.260267	5554488	0.257429	0.0020582	0.00890948			26.4288	0.2724	8.2124	0.17819			-2307	-1346	0	23	18	-1
NJU-Ba-1-std@21		2022-11-30	20:37:00	1.99015	2738495000	0.281269	5634032	0.278344	0.00205735	0.0100814		26.0069	26.0069	-0.138752	7.80125	0.201628			-1742	905	-6	22	19	8
NJU-Ba-1@37		2022-11-30	20:42:00	1.98397	2724635000	0.264652	5604300	0.256037	0.00205691	0.0111354			25.7875	-0.352589	7.58741	0.222708			-2096	-1031	-1	21	23	6
NJU-Ba-1@38		2022-11-30	20:47:00	1.98475	2731193000	0.280813	5620134	0.280981	0.00205776	0.00685564			26.2109	0.0600204	8.00002	0.137113			-2002	-712	3	20	23	5
NJU-Ba-1@39		2022-11-30	20:52:00	1.98373	2728308000	0.290437	5612908	0.289912	0.00205729	0.00859954			25.9755	-0.169369	7.77063	0.171991			-1955	-434	-6	19	22	6
NJU-Ba-1@40		2022-11-30	20:58:00	1.97943	2726482000	0.274931	5609655	0.27299	0.00205747	0.0049476			26.0682	-0.0789742	7.86103	0.098952			-1655	-420	-1	20	24	6
NJU-Ba-1@41		2022-11-30	21:03:00	1.97293	2701111000	0.253575	5557957	0.249161	0.00205766	0.00940178			26.162	0.0123929	7.95239	0.188036			-1772	-739	1	21	21	4
NJU-Ba-1-std@22		2022-11-30	21:08:00	1.97239	2715847000	0.296608	5589344	0.295219	0.00205805	0.00689011		26.3565	26.3565	0.201931	8.14193	0.137802			-1149	1016	-1	23	24	7
NJU-Ba-1@42		2022-11-30	21:14:00	1.96918	2761126000	0.349475	5678936	0.348964	0.00205675	0.00707473			25.7067	-0.431321	7.50868	0.141495			-1541	-911	1	21	25	10
NJU-Ba-1@43		2022-11-30	21:19:00	1.96558	2701324000	0.288373	5558612	0.286198	0.00205774	0.00902908			26.2014	0.0507865	7.99079	0.180582			-1640	-1088	1	22	26	11
NJU-Ba-1@44		2022-11-30	21:24:00	1.97192	2705766000	0.299367	5563873	0.29572	0.00205631	0.0103156			25.4872	-0.645158	7.29484	0.206312			-1902	-1371	0	22	23	11
NJU-Ba-1@45		2022-11-30	21:29:00	1.97927	2745380000	0.29971	5649276	0.292212	0.00205775	0.0108597			26.2059	0.0551604	7.99516	0.217193			-1558	-1417	3	22	31	10
NJU-Ba-1@46		2022-11-30	21:35:00	1.97716	2730254000	0.390162	5615283	0.384881	0.0020567	0.00876085			25.6817	-0.45562	7.48438	0.175217			-1283	-1340	0	22	31	6
NJU-Ba-1-std@23		2022-11-30	21:40:00	1.97473	2717437000	0.279827	5590071	0.273995	0.00205712	0.0101584		25.8917	25.8917	-0.251016	7.68898	0.203169			-837	1018	2	23	28	7
NJU-Ba-1@50		2022-11-30	21:45:00	1.97528	2773957000	0.213727	5706775	0.214056	0.00205727	0.00470192			25.9665	-0.178117	7.76188	0.0940383			-1399	-1121	6	21	30	6
NJU-Ba-1@51		2022-11-30	21:50:00	1.97755	2739465000	0.288503	5636436	0.281858	0.0020575	0.0112322			26.0837	-0.0639083	7.87609	0.224645			-1370	-809	1	20	27	6
NJU-Ba-1@52		2022-11-30	21:56:00	1.97904	2726226000	0.285346	5611029	0.2822	0.00205817	0.00765804			26.4168	0.260736	8.20074	0.153161			-1355	-488	-2	20	27	5
NJU-Ba-1@53		2022-11-30	22:01:00	1.97333	2731725000	0.322737	5620602	0.319642	0.00205753	0.00813815			26.0981	-0.0498145	7.89019	0.162763			-963	-460	1	20	24	3
NJU-Ba-1@54		2022-11-30	22:06:00	1.97153	2722930000	0.27984	5604674	0.275866	0.00205833	0.00901853			26.4961	0.338009	8.27801	0.180371			-733	-446	1	20	29	5
NJU-Ba-1-std@24		2022-11-30	22:11:00	1.97074	2726068000	0.281885	5608618	0.277035	0.00205741	0.00764254		26.0358	26.0358	-0.110564	7.82944	0.152851			-365	1080	-2	23	27	10
NJU-Ba-1@55		2022-11-30	22:17:00	1.96472	2701103000	0.287876	5558238	0.283668	0.00205777	0.0076068			26.2173	0.0663383	8.00634	0.152136			-764	-832	4	22	29	8
NJU-Ba-1@56		2022-11-30	22:22:00	1.97043	2717943000	0.293441	5592029	0.287353	0.00205746	0.00904054			26.0602	-0.0867501	7.85325	0.180811			-918	-1093	8	22	29	9
NJU-Ba-1@57		2022-11-30	22:27:00	1.97137	2710674000	0.291372	5581038	0.2892	0.00205891	0.00791			26.7874	0.621831	8.56183	0.1582			-828	-1265	8	23	32	9
NJU-Ba-1@58		2022-11-30	22:33:00	1.97137	2726428000	0.305471	5611821	0.30264	0.00205831	0.00541262			26.4856	0.327804	8.2678	0.108252			-493	-752	6	21	33	5
NJU-Ba-1@59		2022-11-30	22:38:00	1.97035	2724755000	0.310653	5607661	0.307132	0.00205805	0.0093802			26.355	0.200473	8.14047	0.187604			-339	-446	3	20	28	3
NJU-Ba-1-std@25		2022-11-30	22:43:00	1.96605	2721562000	0.267079	5598967	0.261077	0.00205727	0.00904791		25.967	25.967	-0.177631	7.76237	0.180958			561	1249	4	24	32	9
NJU-Ba-1@60		2022-11-30	22:48:00	1.96762	2720931000	0.29818	5598254	0.290704	0.00205749	0.010019			26.0752	-0.0721703	7.86783	0.20038			-137	-480	9	21	34	9
NJU-Ba-1@61		2022-11-30	22:54:00	1.96308	2703992000	0.271053	5565104	0.27136	0.00205811	0.00950872			26.3844	0.229147	8.16915	0.190174			-105	-814	11	22	31	8
NJU-Ba-1@62		2022-11-30	22:59:00	1.95995	2694013000	0.286154	5544412	0.284942	0.00205805	0.0100479			26.357	0.202417	8.14242	0.200959			61	-739	9	21	32	6
NJU-Ba-1@63		2022-11-30	23:04:00	1.95791	2694747000	0.32535	5546161	0.321651	0.00205814	0.00794517			26.4029	0.247128	8.18713	0.158903			35	-1089	10	23	35	11
NJU-Ba-1@64		2022-11-30	23:10:00	1.96018	2727650000	0.308387	5607819	0.300249	0.00205593	0.0107433			25.2972	-0.830322	7.10968	0.214865			-110	-1421	-1	21	36	10
NJU-Ba-1-std@26		2022-11-30	23:15:00	1.95588	2694036000	0.27862	5543066	0.271919	0.00205754	0.0100706		26.1021	26.1021	-0.0459265	7.89407	0.201412			617	1263	4	24	31	9
											AVE	26.0526	26.1241	0	7.94
											2SD	0.301284	0.526459	0.522975	0.522975
Session 6		Date	Start time	Ipr (nA)	16O/Coeff	1se(%)	18O/Coeff	1se(%)	18O/16O	1se(%)			δ18O (‰, raw)	δ18O* (‰)	δ18O (‰, VSMOW)	2se (‰)			x-posn	y-posn	DTFA x	DTFAy	DTCA x	DTCA y
Sample #					L'2		H'2		H'2/L'2										(μm)	(μm)	(digits)	(digits)	(digits)	(digits)
NJU-Ba-1@01		2023-04-20	13:15:00	2.04835	2733277000	0.435862	5530712	0.432172	0.00202348	0.00783979			9.1158	-0.195544	7.74446	0.156796			-6221	1406	-24	6	-21	29
NJU-Ba-1@02		2023-04-20	13:20:00	2.04937	2701323000	0.339762	5466405	0.335733	0.00202361	0.00724902			9.18013	-0.131805	7.8082	0.14498			-5984	1454	-22	6	-24	27
NJU-Ba-1@03		2023-04-20	13:26:00	2.05218	2732671000	0.640836	5529579	0.632049	0.00202353	0.0221038			9.14123	-0.170345	7.76966	0.442076			-5973	1512	-21	4	-24	21
NJU-Ba-1@04		2023-04-20	13:31:00	2.05085	2751296000	0.551525	5567306	0.545758	0.00202353	0.00855351			9.14323	-0.168368	7.77163	0.17107			-6211	1195	-20	8	-20	24
NJU-Ba-1@05		2023-04-20	13:37:00	2.05187	2750225000	0.633449	5569898	0.634485	0.00202525	0.00619482			9.999	0.67951	8.61951	0.123896			-6214	1095	-22	13	-27	39
NJU-Ba-1@06		2023-04-20	13:42:00	2.05594	2692149000	0.490707	5451256	0.488135	0.00202488	0.00806306			9.81249	0.494716	8.43472	0.161261			-6111	1110	-21	13	-25	40
NJU-Ba-1@07		2023-04-20	13:52:00	2.05578	2750385000	0.554178	5566217	0.550909	0.0020238	0.00503618			9.27738	-0.0354548	7.90455	0.100724			-5048	586	-9	10	-23	27
NJU-Ba-1@08		2023-04-20	13:58:00	2.05562	2700238000	0.66823	5456193	0.656663	0.00202066	0.0130772			7.71195	-1.58644	6.35356	0.261543			-4967	599	-8	9	-17	32
NJU-Ba-1@09		2023-04-20	14:04:00	2.05719	2741383000	0.565816	5547978	0.562058	0.0020238	0.0057591			9.27389	-0.0389135	7.90109	0.115182			-4841	616	-6	18	-25	30
NJU-Ba-1@10		2023-04-20	14:09:00	2.05617	2733643000	0.492445	5532390	0.490648	0.00202382	0.00503969			9.28586	-0.0270551	7.91294	0.100794			-5143	936	-8	17	-23	30
NJU-Ba-1@11		2023-04-20	14:15:00	2.06243	2734167000	0.423696	5533833	0.4215	0.00202396	0.00484241			9.35518	0.0416251	7.98163	0.0968483			-5067	950	-9	17	-24	30
NJU-Ba-1@12		2023-04-20	14:20:00	2.07104	2750487000	0.541142	5567145	0.537634	0.00202406	0.0056417			9.40804	0.0939998	8.034	0.112834			-4989	963	-7	16	-24	30
NJU-Ba-1@13		2023-04-20	14:26:00	2.06564	2751312000	0.55132	5568014	0.549328	0.00202377	0.00684883			9.26142	-0.0512661	7.88873	0.136977			-4903	983	-6	16	-24	29
NJU-Ba-1@14		2023-04-20	14:31:00	2.06313	2751802000	0.564772	5568798	0.561903	0.0020237	0.0058464			9.22501	-0.0873355	7.85266	0.116928			-5072	1327	-5	13	-22	24
NJU-Ba-1@15		2023-04-20	14:37:00	2.06619	2749197000	0.48579	5564065	0.484205	0.00202389	0.00489102			9.32077	0.00753204	7.94753	0.0978205			-4949	1368	-7	12	-25	22
NJU-Ba-1@16		2023-04-20	14:42:00	2.06134	2756261000	0.452255	5578112	0.450433	0.0020238	0.00498951			9.27588	-0.0369371	7.90306	0.0997901			-4976	1625	-6	13	-23	27
NJU-Ba-1@17		2023-04-20	14:48:00	2.06087	2731872000	0.430643	5528548	0.429882	0.00202372	0.00548576			9.23748	-0.0749829	7.86502	0.109715			-4879	1633	-7	13	-25	27
NJU-Ba-1@18		2023-04-20	14:53:00	2.06533	2741954000	0.467183	5549671	0.464006	0.00202399	0.00580035			9.37064	0.0569422	7.99694	0.116007			-4821	1670	-7	12	-26	25
NJU-Ba-1@19		2023-04-20	14:59:00	2.06963	2748434000	0.383797	5562695	0.382209	0.00202395	0.0046155			9.35218	0.0386604	7.97866	0.09231			-4539	1015	0	8	-23	25
NJU-Ba-1@20		2023-04-20	15:04:00	2.0719	2749789000	0.499133	5565607	0.496185	0.00202402	0.00586203			9.3846	0.0707771	8.01078	0.117241			-4448	1018	-2	8	-25	25
NJU-Ba-1@21		2023-04-20	15:10:00	2.07315	2751592000	0.478679	5568868	0.475582	0.00202388	0.00584835			9.31428	0.00110872	7.94111	0.116967			-4363	965	-4	8	-27	28
NJU-Ba-1@22		2023-04-20	15:15:00	2.07229	2772149000	0.540699	5610372	0.536164	0.00202384	0.00618297			9.29783	-0.0151966	7.9248	0.123659			-4167	1280	2	7	-24	26
NJU-Ba-1@23		2023-04-20	15:21:00	2.07417	2758422000	0.48827	5582428	0.484982	0.00202378	0.00571193			9.26691	-0.0458309	7.89417	0.114239			-4084	1289	0	7	-27	27
NJU-Ba-1@24		2023-04-20	15:27:00	2.07495	2763895000	0.438149	5593283	0.43431	0.0020237	0.00549877			9.22751	-0.084865	7.85514	0.109975			-3759	1477	4	7	-27	27
NJU-Ba-1@25		2023-04-20	15:32:00	2.06885	2760704000	0.522237	5587257	0.517673	0.00202386	0.00673846			9.3068	-0.00630281	7.9337	0.134769			-3913	1026	3	8	-26	27
NJU-Ba-1@26		2023-04-20	15:38:00	2.06259	2719061000	0.26265	5503257	0.261508	0.00202396	0.00464014			9.35368	0.0401428	7.98014	0.0928027			-3055	1474	10	8	-24	28
NJU-Ba-1@27		2023-04-20	15:43:00	2.06282	2743642000	0.485083	5553604	0.481026	0.00202418	0.00698088			9.46539	0.150822	8.09082	0.139618			-2935	1556	10	7	-25	25
NJU-Ba-1@28		2023-04-20	15:49:00	2.05789	2747156000	0.530554	5560531	0.528875	0.00202411	0.00854226			9.42948	0.115246	8.05525	0.170845			-2674	1552	15	7	-24	26
NJU-Ba-1@29		2023-04-20	15:54:00	2.05852	2750221000	0.57153	5565885	0.56696	0.00202381	0.00705865			9.27887	-0.0339725	7.90603	0.141173			-2662	1281	14	8	-24	28
NJU-Ba-1@30		2023-04-20	16:00:00	2.06595	2732000000	0.456488	5529825	0.451943	0.0020241	0.00749834			9.42649	0.112282	8.05228	0.149967			-2530	1275	14	8	-26	29
NJU-Ba-1@31		2023-04-20	16:05:00	2.06806	2765471000	0.569496	5596300	0.566942	0.00202364	0.00472368			9.19559	-0.116487	7.82351	0.0944735			-2769	991	16	8	-23	26
NJU-Ba-1@32		2023-04-20	16:11:00	2.0683	2765606000	0.568523	5596389	0.563646	0.00202358	0.00667975			9.16517	-0.146628	7.79337	0.133595			-2757	912	15	9	-24	30
NJU-Ba-1@33		2023-04-20	16:16:00	2.06493	2748493000	0.517719	5562872	0.514185	0.00202398	0.00580186			9.36515	0.0515071	7.99151	0.116037			-2663	971	14	8	-25	26
NJU-Ba-1@34		2023-04-20	16:22:00	2.06361	2756780000	0.504155	5578331	0.502125	0.0020235	0.00593816			9.12627	-0.185168	7.75483	0.118763			-2679	580	15	10	-23	27
NJU-Ba-1@35		2023-04-20	16:27:00	2.0654	2739055000	0.451887	5542503	0.450433	0.00202351	0.00795062			9.13226	-0.179238	7.76076	0.159012			-2624	551	14	10	-25	29
NJU-Ba-1@36		2023-04-20	16:33:00	2.06345	2705833000	0.306943	5476286	0.307246	0.00202388	0.00572655			9.31628	0.00308512	7.94309	0.114531			-2570	604	12	9	-26	26
NJU-Ba-1@37		2023-04-20	16:39:00	2.06587	2752206000	0.573913	5569908	0.570083	0.00202381	0.00715492			9.27887	-0.0339725	7.90603	0.143098			-2290	587	17	9	-25	30
NJU-Ba-1@38		2023-04-20	16:44:00	2.06705	2749793000	0.478988	5565759	0.476795	0.00202407	0.00530955			9.41003	0.0959762	8.03598	0.106191			-2205	627	15	8	-26	26
NJU-Ba-1@39		2023-04-20	16:50:00	2.069	2744293000	0.443968	5553888	0.442445	0.0020238	0.0047818			9.27489	-0.0379253	7.90207	0.0956359			-2163	941	16	8	-27	28
NJU-Ba-1@40		2023-04-20	16:55:00	2.06118	2789613000	0.430054	5648608	0.428515	0.00202487	0.00458058			9.81149	0.493728	8.43373	0.0916116			-2256	864	13	10	-28	24
NJU-Ba-1@41		2023-04-20	17:01:00	2.06227	2770091000	0.556956	5605722	0.554849	0.00202366	0.00648731			9.20806	-0.104135	7.83587	0.129746			-1756	1370	20	7	-26	25
NJU-Ba-1@42		2023-04-20	17:06:00	2.06329	2735832000	0.546796	5537405	0.542893	0.00202404	0.00740531			9.39457	0.0806591	8.02066	0.148106			-1627	1395	21	7	-26	27
NJU-Ba-1@43		2023-04-20	17:12:00	2.06204	2738922000	0.551856	5543540	0.548035	0.00202399	0.00592814			9.37263	0.0589186	7.99892	0.118563			-1539	1418	20	6	-26	26
												AVE	9.31168	0	7.94
												2SD	0.295687	0.29	0.289888
Session 7		Date	Start time	Ipr (nA)	16O/Coeff	1se(%)	18O/Coeff	1se(%)	18O/16O	1se(%)			δ18O (‰, raw)	δ18O* (‰)	δ18O (‰, VSMOW)	2se (‰)			x-posn	y-posn	DTFA x	DTFAy	DTCA x	DTCA y
Sample #					L'2		H'2		H'2/L'2										(μm)	(μm)	(digits)	(digits)	(digits)	(digits)
NJU-Ba-1@01		2023-04-20	17:52:00	2.078	2765194000	0.569734	5596554	0.566917	0.00202393	0.00689504			9.34271	-0.114918	7.82508	0.137901			-825	1529	26	15	-26	27
NJU-Ba-1@02		2023-04-20	17:57:00	2.08058	2763330000	0.570844	5593318	0.569033	0.00202413	0.00477709			9.43846	-0.0200638	7.91994	0.0955418			-761	1495	26	7	-27	26
NJU-Ba-1@03		2023-04-20	18:03:00	2.08481	2772176000	0.482547	5610615	0.480623	0.00202391	0.0058995			9.32875	-0.128751	7.81125	0.11799			-456	1009	30	9	-25	29
NJU-Ba-1@04		2023-04-20	18:08:00	2.08371	2750299000	0.467754	5567502	0.463687	0.00202433	0.00677033			9.54219	0.0826945	8.02269	0.135407			-374	994	28	8	-26	29
NJU-Ba-1@05		2023-04-20	18:14:00	2.07878	2771754000	0.570036	5610067	0.564619	0.00202403	0.00780659			9.38809	-0.0699609	7.87004	0.156132			-374	1300	30	7	-25	24
NJU-Ba-1@06		2023-04-20	18:19:00	2.07651	2756323000	0.573296	5578582	0.570052	0.00202393	0.00652433			9.34022	-0.117388	7.82261	0.130487			-346	1213	28	8	-27	30
NJU-Ba-1@07		2023-04-20	18:25:00	2.07972	2762075000	0.409965	5589849	0.407932	0.00202379	0.00460438			9.2704	-0.186552	7.75345	0.0920875			153	528	33	9	-24	30
NJU-Ba-1@08		2023-04-20	18:30:00	2.078	2758600000	0.57064	5582883	0.566776	0.00202382	0.00610751			9.28486	-0.172225	7.76777	0.12215			258	535	32	9	-25	29
NJU-Ba-1@09		2023-04-20	18:36:00	2.07636	2739210000	0.38861	5544198	0.387394	0.00202402	0.0059799			9.3831	-0.0749012	7.8651	0.119598			826	527	36	9	-26	31
NJU-Ba-1@10		2023-04-20	18:41:00	2.0798	2752652000	0.550791	5569733	0.545656	0.00202342	0.00702492			9.08488	-0.370331	7.56967	0.140498			1012	503	39	10	-22	32
NJU-Ba-1@11		2023-04-20	18:47:00	2.07792	2775299000	0.577662	5616189	0.57261	0.00202365	0.00730023			9.19858	-0.257692	7.68231	0.146005			899	1337	38	7	-25	29
NJU-Ba-1@12		2023-04-20	18:53:00	2.07018	2763267000	0.559645	5592155	0.55462	0.00202376	0.0068144			9.25544	-0.201373	7.73863	0.136288			1289	1471	41	5	-25	22
NJU-Ba-1@13		2023-04-20	18:58:00	2.06838	2742565000	0.568019	5550738	0.561223	0.00202394	0.00824568			9.34421	-0.113436	7.82656	0.164914			1348	1477	38	5	-27	21
NJU-Ba-1@14		2023-04-20	19:04:00	2.07174	2739247000	0.530087	5544968	0.528253	0.00202427	0.00472789			9.51077	0.0515706	7.99157	0.0945578			1282	1411	42	7	-25	26
NJU-Ba-1@15		2023-04-20	19:09:00	2.0744	2747747000	0.510318	5561470	0.506741	0.00202402	0.00594826			9.3846	-0.0734191	7.86658	0.118965			1282	1357	39	7	-27	29
NJU-Ba-1@16		2023-04-20	19:15:00	2.07299	2734608000	0.404617	5535889	0.403568	0.00202438	0.00462656			9.56663	0.106902	8.0469	0.0925313			1446	627	42	8	-25	25
NJU-Ba-1@17		2023-04-20	19:20:00	2.07331	2751004000	0.568935	5568448	0.564664	0.00202416	0.00800285			9.45591	-0.00277275	7.93723	0.160057			1463	565	40	9	-27	29
NJU-Ba-1@18		2023-04-20	19:26:00	2.05789	2796829000	0.609849	5667368	0.605003	0.00202637	0.00736729			10.5556	1.08656	9.02656	0.147346			1474	517	38	14	-22	40
NJU-Ba-1@19		2023-04-20	19:31:00	2.05821	2787262000	0.56795	5639692	0.564128	0.00202339	0.00611115			9.07092	-0.384164	7.55584	0.122223			1516	572	54	14	-25	33
NJU-Ba-1@20		2023-04-20	19:37:00	2.06353	2803393000	0.560241	5680118	0.558597	0.00202616	0.00456797			10.4538	0.985782	8.92578	0.0913595			1350	479	51	7	-23	23
NJU-Ba-1@21		2023-04-20	19:42:00	2.06454	2898019000	0.575035	5865274	0.571764	0.0020239	0.00613039			9.32476	-0.132703	7.8073	0.122608			1412	491	34	7	-24	15
NJU-Ba-1@22		2023-04-20	19:48:00	2.06384	2744952000	0.55499	5555565	0.551257	0.00202393	0.00618804			9.34022	-0.117388	7.82261	0.123761			2386	552	46	9	-27	28
NJU-Ba-1@23		2023-04-20	19:53:00	2.06564	2731043000	0.563488	5526838	0.55984	0.00202372	0.00639829			9.23499	-0.221628	7.71837	0.127966			2304	536	48	9	-26	28
NJU-Ba-1@24		2023-04-20	19:59:00	2.06728	2740300000	0.525848	5545656	0.52183	0.00202375	0.00793542			9.25045	-0.206313	7.73369	0.158708			3151	1462	55	7	-26	28
NJU-Ba-1@25		2023-04-20	20:04:00	2.07956	2756409000	0.592529	5577996	0.591328	0.00202365	0.00460922			9.20058	-0.255716	7.68428	0.0921844			3236	1550	54	5	-26	21
NJU-Ba-1@26		2023-04-20	20:10:00	2.08449	2767889000	0.579813	5601859	0.575566	0.00202388	0.00635156			9.31777	-0.139619	7.80038	0.127031			4134	1498	65	6	-26	26
NJU-Ba-1@27		2023-04-20	20:16:00	2.07471	2741556000	0.541847	5548025	0.538513	0.00202368	0.00520646			9.21803	-0.238425	7.70157	0.104129			4272	1579	66	5	-27	24
NJU-Ba-1@28		2023-04-20	20:21:00	2.07675	2726270000	0.555629	5517345	0.550952	0.00202378	0.00754941			9.26641	-0.190504	7.7495	0.150988			4341	1588	63	5	-28	24
NJU-Ba-1@29		2023-04-20	20:27:00	2.07667	2795435000	0.556597	5659116	0.553262	0.00202442	0.00646895			9.58558	0.125675	8.06568	0.129379			-5655	3385	-17	0	-23	21
NJU-Ba-1@30		2023-04-20	20:32:00	2.06533	2767613000	0.550928	5602895	0.547651	0.00202446	0.00643286			9.60353	0.14346	8.08346	0.128657			-5540	3409	-16	0	-24	23
NJU-Ba-1@31		2023-04-20	20:38:00	2.07299	2740307000	0.347378	5547765	0.344954	0.00202451	0.00491769			9.62946	0.16915	8.10915	0.0983539			-5463	3442	-17	0	-25	21
NJU-Ba-1@32		2023-04-20	20:43:00	2.06955	2773484000	0.56042	5612948	0.557187	0.0020238	0.00617715			9.27439	-0.1826	7.7574	0.123543			-5783	2728	-16	4	-20	29
NJU-Ba-1@33		2023-04-20	20:49:00	2.0672	2768635000	0.507306	5604348	0.503856	0.00202423	0.00683654			9.49232	0.0332915	7.97329	0.136731			-5114	2732	-9	5	-22	28
NJU-Ba-1@34		2023-04-20	20:55:00	2.06306	2749948000	0.505071	5566919	0.502409	0.00202438	0.00516197			9.56413	0.104432	8.04443	0.103239			-5058	2714	-12	5	-24	29
NJU-Ba-1@35		2023-04-20	21:00:00	2.06321	2749680000	0.528694	5567712	0.525937	0.00202486	0.00571942			9.8065	0.344531	8.28453	0.114388			-5049	3761	-12	0	-25	23
NJU-Ba-1@36		2023-04-20	21:06:00	2.05265	2743450000	0.445539	5554167	0.444388	0.00202452	0.00498683			9.63545	0.175078	8.11508	0.0997365			-5289	3681	-12	0	-22	27
NJU-Ba-1@37		2023-04-20	21:11:00	2.05383	2736311000	0.501068	5540428	0.499089	0.00202478	0.00462757			9.76661	0.305008	8.24501	0.0925513			-5018	3330	-9	3	-24	28
NJU-Ba-1@38		2023-04-20	21:17:00	2.05023	2728439000	0.532448	5523108	0.528611	0.00202428	0.0062256			9.51626	0.0570049	7.997	0.124512			-4891	3384	-8	3	-24	25
NJU-Ba-1@39		2023-04-20	21:22:00	2.04608	2715744000	0.51135	5497682	0.50701	0.00202438	0.00696091			9.56663	0.106902	8.0469	0.139218			-4770	3407	-6	2	-24	25
NJU-Ba-1@40		2023-04-20	21:28:00	2.04342	2743691000	0.583218	5552955	0.580975	0.0020239	0.00520211			9.32825	-0.129245	7.81076	0.104042			-4702	3379	-6	4	-25	30
NJU-Ba-1@41		2023-04-20	21:33:00	2.04115	2700973000	0.444343	5468138	0.442774	0.00202451	0.00466305			9.62946	0.16915	8.10915	0.0932609			-4432	3760	-3	2	-23	25
NJU-Ba-1@42		2023-04-20	21:39:00	2.04475	2734552000	0.562571	5536013	0.559363	0.00202447	0.00610211			9.61251	0.152353	8.09235	0.122042			-4350	3359	0	4	-22	27
NJU-Ba-1@43		2023-04-20	21:44:00	2.03927	2709694000	0.391944	5485967	0.388063	0.00202458	0.00643317			9.66338	0.202744	8.14274	0.128663			-4290	3386	-1	4	-25	26
NJU-Ba-1@44		2023-04-20	21:50:00	2.03513	2658311000	0.217595	5382524	0.215853	0.00202479	0.00555447			9.7706	0.30896	8.24896	0.111089			-4200	3450	-1	4	-25	26
NJU-Ba-1@45		2023-04-20	21:55:00	2.02918	2704606000	0.547626	5475550	0.543013	0.00202454	0.00625392			9.64393	0.183477	8.12348	0.125078			-4121	3464	-1	3	-26	26
NJU-Ba-1@46		2023-04-20	22:01:00	2.02597	2698844000	0.564606	5463864	0.560218	0.00202453	0.0081807			9.63994	0.179525	8.11952	0.163614			-4314	3304	-1	5	-24	31
NJU-Ba-1@47		2023-04-20	22:06:00	2.02566	2689328000	0.521763	5444445	0.519111	0.00202447	0.00513623			9.60902	0.148895	8.08889	0.102725			-4258	3350	-2	5	-26	30
NJU-Ba-1@48		2023-04-20	22:12:00	2.02824	2686501000	0.557818	5438958	0.551367	0.00202456	0.00751242			9.65739	0.196816	8.13682	0.150248			-4183	3408	-1	4	-24	27
NJU-Ba-1@49		2023-04-20	22:18:00	2.03497	2712307000	0.545945	5490998	0.542847	0.00202448	0.00685733			9.616	0.155811	8.09581	0.137147			-4273	2719	1	6	-23	29
NJU-Ba-1@50		2023-04-20	22:23:00	2.03748	2689325000	0.400801	5444486	0.397563	0.00202448	0.00625737			9.61749	0.157293	8.09729	0.125147			-4201	2719	0	6	-24	29
NJU-Ba-1@51		2023-04-20	22:29:00	2.03802	2711642000	0.550054	5489589	0.546766	0.00202446	0.00597739			9.60453	0.144448	8.08445	0.119548			-4135	2777	-2	5	-25	25
NJU-Ba-1@52		2023-04-20	22:34:00	2.04053	2704833000	0.350367	5474375	0.350668	0.00202392	0.00654428			9.33722	-0.120352	7.81965	0.130886			-3892	3774	0	3	-26	24
NJU-Ba-1@53		2023-04-20	22:40:00	2.03622	2722821000	0.549014	5510909	0.546124	0.00202398	0.00463694			9.36415	-0.0936744	7.84633	0.0927388			-3268	3733	7	4	-25	25
NJU-Ba-1@54		2023-04-20	22:45:00	2.03067	2698840000	0.558256	5463938	0.55393	0.00202456	0.00771827			9.6549	0.194345	8.13435	0.154365			-2206	3764	17	4	-24	23
NJU-Ba-1@55		2023-04-20	22:51:00	2.03051	2685939000	0.469928	5437862	0.467844	0.00202457	0.00589645			9.65988	0.199286	8.13929	0.117929			-2155	3681	15	6	-26	27
NJU-Ba-1@56		2023-04-20	22:56:00	2.03489	2696615000	0.567583	5458870	0.564067	0.00202435	0.00615637			9.55017	0.090599	8.0306	0.123127			-186	3337	30	5	-25	26
NJU-Ba-1@57		2023-04-20	23:02:00	2.04092	2696494000	0.538595	5459400	0.53438	0.00202464	0.00655217			9.6938	0.23288	8.17288	0.131043			-41	3606	30	4	-26	25
NJU-Ba-1@58		2023-04-20	23:07:00	2.02801	2700663000	0.550711	5466933	0.548213	0.0020243	0.00644775			9.52424	0.0649094	8.00491	0.128955			323	3071	35	6	-24	27
NJU-Ba-1@59		2023-04-20	23:13:00	2.01596	2663268000	0.526704	5390679	0.522608	0.00202409	0.00598401			9.422	-0.0363668	7.90363	0.11968			709	3208	37	5	-26	25
NJU-Ba-1@60		2023-04-20	23:18:00	2.00736	2661989000	0.535523	5389492	0.533562	0.00202462	0.00783261			9.68233	0.221517	8.16152	0.156652			515	2756	36	7	-23	28
NJU-Ba-1@61		2023-04-20	23:24:00	2.00212	2643176000	0.505255	5350510	0.502162	0.00202428	0.0050505			9.51476	0.0555229	7.99552	0.10101			580	2783	35	7	-25	27
NJU-Ba-1@62		2023-04-20	23:30:00	1.99867	2644101000	0.492351	5352120	0.488531	0.00202418	0.00714844			9.46589	0.00710786	7.94711	0.142969			803	2777	38	7	-25	28
NJU-Ba-1@63		2023-04-20	23:35:00	1.9975	2634426000	0.524439	5332321	0.519107	0.0020241	0.00637623			9.42699	-0.0314265	7.90857	0.127525			856	2758	37	7	-26	29
NJU-Ba-1@64		2023-04-20	23:41:00	2.00079	2630615000	0.537302	5324622	0.53225	0.00202411	0.00810351			9.42948	-0.0289564	7.91104	0.16207			904	2737	35	7	-26	30
NJU-Ba-1@65		2023-04-20	23:46:00	2	2616762000	0.3527	5296811	0.348828	0.00202419	0.00613028			9.47088	0.0120482	7.95205	0.122606			924	2812	36	6	-26	24
NJU-Ba-1@66		2023-04-20	23:52:00	1.99726	2641682000	0.520858	5346821	0.517819	0.00202403	0.00601597			9.38909	-0.0689728	7.87103	0.120319			1165	3612	42	4	-23	25
NJU-Ba-1@67		2023-04-20	23:57:00	1.99281	2624934000	0.523838	5313998	0.519459	0.00202444	0.00730313			9.59505	0.135062	8.07506	0.146063			1246	3653	40	3	-27	24
NJU-Ba-1@68		2023-04-21	00:03:00	1.99015	2627001000	0.525212	5316593	0.520706	0.00202384	0.00641522			9.29384	-0.163333	7.77667	0.128304			2772	2798	52	5	-25	28
NJU-Ba-1@69		2023-04-21	00:08:00	1.99296	2599010000	0.657722	5256552	0.659302	0.00202257	0.164496			8.66148	-0.789763	7.15024	3.28993			2872	2832	52	5	-25	28
NJU-Ba-1@70		2023-04-21	00:14:00	1.99077	2601503000	0.379716	5266192	0.379582	0.00202429	0.00529323			9.51925	0.0599691	7.99997	0.105865			2961	2858	52	5	-27	29
NJU-Ba-1@71		2023-04-21	00:19:00	1.98553	2614231000	0.478479	5290346	0.474983	0.00202368	0.00638706			9.21554	-0.240895	7.6991	0.127741			3516	3639	63	0	-24	26
NJU-Ba-1@72		2023-04-21	00:25:00	1.98936	2596202000	0.273448	5255405	0.271161	0.00202427	0.00564603			9.50977	0.0505825	7.99058	0.112921			3616	3698	61	-2	-27	21
NJU-Ba-1@73		2023-04-21	00:30:00	1.98639	2619017000	0.526301	5301337	0.522218	0.00202418	0.00653871			9.46489	0.0061198	7.94612	0.130774			3915	3612	66	-1	-26	25
NJU-Ba-1@74		2023-04-21	00:36:00	1.9853	2598537000	0.51266	5259867	0.510502	0.00202417	0.00603312			9.4599	0.0011795	7.94118	0.120662			4045	3675	67	-2	-26	21
NJU-Ba-1@75		2023-04-21	00:41:00	1.98889	2602571000	0.515383	5268085	0.512223	0.00202419	0.00474162			9.47088	0.0120482	7.95205	0.0948323			4151	3677	65	-2	-28	24
NJU-Ba-1@76		2023-04-21	00:47:00	1.98444	2594220000	0.510819	5250893	0.506446	0.00202408	0.00758184			9.41702	-0.0413071	7.89869	0.151637			4110	3627	67	-2	-28	27
NJU-Ba-1@77		2023-04-21	00:52:00	1.98334	2594883000	0.518957	5251581	0.517359	0.00202382	0.00581784			9.28835	-0.168767	7.77123	0.116357			4029	3610	66	-1	-27	27
NJU-Ba-1@78		2023-04-21	00:58:00	1.98123	2619252000	0.463679	5302051	0.461313	0.00202427	0.00672856			9.50828	0.0491005	7.9891	0.134571			3790	3395	64	0	-25	26
NJU-Ba-1@79		2023-04-21	01:04:00	1.98412	2610678000	0.523643	5283527	0.520738	0.00202382	0.00565685			9.28586	-0.171237	7.76876	0.113137			3899	3211	65	1	-25	22
NJU-Ba-1@80		2023-04-21	01:09:00	1.98279	2595405000	0.469959	5252187	0.465106	0.00202366	0.00687023			9.20457	-0.251764	7.68824	0.137405			3980	3187	64	1	-28	25
NJU-Ba-1@81		2023-04-21	01:15:00	1.9824	2573596000	0.448022	5208593	0.44349	0.00202387	0.00648239			9.3088	-0.148512	7.79149	0.129648			4024	3192	63	1	-27	26
NJU-Ba-1@82		2023-04-21	01:20:00	1.97732	2598238000	0.505606	5258708	0.501272	0.00202396	0.00668786			9.35568	-0.102073	7.83793	0.133757			3493	3138	59	3	-26	26
NJU-Ba-1@83		2023-04-21	01:26:00	1.98357	2599425000	0.509044	5261584	0.50445	0.00202414	0.00692939			9.44644	-0.0121593	7.92784	0.138588			3528	3439	61	1	-25	25
NJU-Ba-1@84		2023-04-21	01:31:00	1.98897	2602057000	0.373562	5268043	0.371392	0.00202457	0.00609498			9.66088	0.200274	8.14027	0.1219			3283	2831	57	4	-25	27
												AVE	9.45615	0	7.93746
												2SD	0.320596	0.32	0.317592
Session 8		Date	Start time	Ipr (nA)	16O/Coeff	1se(%)	18O/Coeff	1se(%)	18O/16O	1se(%)			δ18O (‰, raw)	δ18O* (‰)	δ18O (‰, VSMOW)	2se (‰)			x-posn	y-posn	DTFA x	DTFAy	DTCA x	DTCA y
Sample #					L'2		H'2		H'2/L'2										(μm)	(μm)	(digits)	(digits)	(digits)	(digits)
NJU-Ba-1@01		2023-04-21	09:27:00	1.93491	2601062000	0.392276	5261923	0.389155	0.002023	0.00514781			8.87443	-0.529309	7.41069	0.102956			-151	3621	33	12	-23	26
NJU-Ba-1@02		2023-04-21	09:33:00	1.9206	2537707000	0.496581	5136362	0.491721	0.00202403	0.00669868			9.38859	-0.0199386	7.92006	0.133974			-263	3332	33	7	-23	27
NJU-Ba-1@03		2023-04-21	09:38:00	1.91403	2510421000	0.438541	5081790	0.433742	0.00202429	0.00620862			9.51825	0.108516	8.04852	0.124172			76	3416	32	5	-24	21
NJU-Ba-1@04		2023-04-21	09:44:00	1.91184	2515434000	0.499184	5092567	0.495502	0.00202454	0.00775011			9.64243	0.231535	8.17154	0.155002			-22	3304	34	7	-24	28
NJU-Ba-1@05		2023-04-21	09:50:00	1.91825	2494421000	0.318642	5049094	0.315256	0.00202416	0.00565721			9.45492	0.0457707	7.98577	0.113144			320	3619	34	4	-24	24
NJU-Ba-1@06		2023-04-21	09:55:00	1.92435	2535011000	0.514715	5131511	0.509779	0.00202427	0.00711766			9.50828	0.0986345	8.03863	0.142353			563	3639	37	4	-24	24
NJU-Ba-1@07		2023-04-21	10:01:00	1.92365	2515122000	0.492424	5091459	0.489374	0.00202434	0.00543732			9.54718	0.137171	8.07717	0.108746			380	3086	32	7	-26	28
NJU-Ba-1@08		2023-04-21	10:06:00	1.92255	2526244000	0.516549	5113838	0.513776	0.00202429	0.0053692			9.52025	0.110492	8.05049	0.107384			367	3132	34	6	-25	25
NJU-Ba-1@09		2023-04-21	10:12:00	1.92576	2521484000	0.408887	5104438	0.40356	0.00202439	0.00789635			9.56862	0.158415	8.09842	0.157927			-48	2745	30	7	-24	25
NJU-Ba-1@10		2023-04-21	10:17:00	1.92701	2503968000	0.39921	5068413	0.39433	0.00202416	0.0071783			9.45542	0.0462647	7.98626	0.143566			-12	2691	30	8	-25	30
NJU-Ba-1@11		2023-04-21	10:23:00	1.92936	2524810000	0.502006	5110918	0.497189	0.00202429	0.00656003			9.51925	0.109504	8.0495	0.131201			644	2800	34	7	-27	26
NJU-Ba-1@12		2023-04-21	10:28:00	1.92529	2519118000	0.510408	5099175	0.50653	0.0020242	0.00656316			9.47437	0.0650388	8.00504	0.131263			774	3204	34	4	-28	23
NJU-Ba-1@13		2023-04-21	10:34:00	1.92686	2525511000	0.545728	5117621	0.540725	0.00202638	0.00722943			10.563	1.14356	9.08356	0.144589			1191	3674	40	8	-25	50
NJU-Ba-1@14		2023-04-21	10:39:00	1.92545	2438294000	0.23577	4940726	0.235818	0.0020263	0.010175			10.5246	1.10552	9.04552	0.203499			1297	3657	40	7	-22	35
NJU-Ba-1@15		2023-04-21	10:45:00	1.91739	2606826000	0.46899	5274921	0.468111	0.00202351	0.00586781			9.12877	-0.277341	7.66266	0.117356			1174	3557	41	5	-23	23
NJU-Ba-1@16		2023-04-21	10:50:00	1.91629	2516718000	0.430578	5094387	0.427828	0.00202422	0.00656635			9.48683	0.0773902	8.01739	0.131327			964	3102	38	7	-26	26
NJU-Ba-1@17		2023-04-21	10:56:00	1.91645	2498725000	0.446016	5058333	0.440512	0.00202438	0.00777625			9.56264	0.152487	8.09249	0.155525			1033	3099	37	7	-26	28
NJU-Ba-1@18		2023-04-21	11:01:00	1.908	2504379000	0.474918	5069208	0.469616	0.00202415	0.00704217			9.44943	0.0403361	7.98034	0.140843			1579	3129	41	6	-27	28
NJU-Ba-1@19		2023-04-21	11:07:00	1.90206	2480222000	0.476215	5020913	0.472745	0.00202439	0.00601999			9.56862	0.158415	8.09842	0.1204			1714	3424	44	5	-27	27
NJU-Ba-1@20		2023-04-21	11:12:00	1.90065	2498539000	0.510257	5057722	0.5048	0.00202428	0.00714218			9.51676	0.107033	8.04703	0.142844			1814	3622	45	2	-26	26
NJU-Ba-1@21		2023-04-21	11:18:00	1.89932	2462977000	0.465811	4985244	0.46161	0.00202408	0.00633653			9.41552	0.00674032	7.94674	0.126731			2892	3197	50	3	-28	25
NJU-Ba-1@22		2023-04-21	11:23:00	1.90526	2493767000	0.47517	5047244	0.471222	0.00202395	0.00698789			9.35119	-0.0569928	7.88301	0.139758			2892	3442	54	1	-25	23
NJU-Ba-1@23		2023-04-21	11:29:00	1.91614	2488021000	0.457288	5036363	0.452338	0.00202425	0.00856995			9.50229	0.0927059	8.03271	0.171399			2984	3461	52	1	-28	23
NJU-Ba-1@24		2023-04-21	11:35:00	1.92224	2521578000	0.497432	5103931	0.492631	0.00202411	0.0061676			9.43098	0.022056	7.96206	0.123352			2853	3422	54	2	-25	24
NJU-Ba-1@25		2023-04-21	11:40:00	1.92795	2526790000	0.507962	5115642	0.505402	0.00202457	0.00580741			9.65839	0.247345	8.18735	0.116148			3586	3153	57	2	-28	26
NJU-Ba-1@26		2023-04-21	11:46:00	1.91825	2499656000	0.47303	5058830	0.468273	0.00202382	0.00827207			9.28536	-0.122208	7.81779	0.165441			3828	3151	65	2	-24	25
NJU-Ba-1@27		2023-04-21	11:51:00	1.9195	2498490000	0.489225	5055777	0.485644	0.00202354	0.00653151			9.14622	-0.260049	7.67995	0.13063			3911	3137	62	2	-28	28
NJU-Ba-1@28		2023-04-21	11:57:00	1.92114	2502636000	0.492278	5065378	0.487652	0.00202403	0.00661156			9.38859	-0.0199386	7.92006	0.132231			3875	3405	60	-1	-29	25
NJU-Ba-1@29		2023-04-21	12:02:00	1.92357	2513662000	0.498563	5087272	0.494204	0.00202386	0.00761356			9.30431	-0.103434	7.83657	0.152271			3833	3607	66	-2	-25	22
NJU-Ba-1@30		2023-04-21	12:08:00	1.9123	2479532000	0.380274	5015574	0.380434	0.0020228	0.0598763			8.77618	-0.626638	7.31336	1.19753			3892	2784	62	5	-26	30
												AVE	9.40872	0	7.94
												2SD	0.414186	0.41	0.410326
Session 9		Date	Start time	Ipr (nA)	16O/Coeff	1se(%)	18O/Coeff	1se(%)	18O/16O	1se(%)			δ18O (‰, raw)	δ18O* (‰)	δ18O (‰, VSMOW)	2se (‰)			x-posn	y-posn	DTFA x	DTFAy	DTCA x	DTCA y
Sample #					L'2		H'2		H'2/L'2										(μm)	(μm)	(digits)	(digits)	(digits)	(digits)
NJU-Ba-1@01		2023-08-21	21:38:00	0.876394	1230000000	0.044821	2490000	0.0481767	0.00202006	0.0110622			7.41073	-0.121214	7.81879	0.221244			-843	5797	-2	-22	29	44
NJU-Ba-1@02		2023-08-21	21:43:00	0.868038	1220000000	0.0485156	2460000	0.0493804	0.00202128	0.0146375			8.01915	0.482655	8.42266	0.292751			-344	5200	4	-18	28	49
NJU-Ba-1@03		2023-08-21	21:49:00	0.859414	1210000000	0.0526817	2450000	0.0570101	0.00202043	0.0166148			7.59525	0.0619268	8.00193	0.332295			-363	5131	3	-17	28	50
NJU-Ba-1@04		2023-08-21	21:54:00	0.857467	1200000000	0.0890315	2430000	0.0914609	0.00202037	0.0151539			7.56533	0.0322284	7.97223	0.303078			-331	5075	3	-17	27	50
NJU-Ba-1@05		2023-08-21	22:00:00	0.859518	1210000000	0.0954964	2440000	0.0937618	0.00202004	0.0140746			7.40076	-0.131113	7.80889	0.281492			-281	5075	1	-15	28	50
NJU-Ba-1@06		2023-08-21	22:05:00	0.85296	1200000000	0.0170283	2430000	0.0176225	0.00202036	0.00726834			7.56034	0.0272786	7.96728	0.145367			-259	5136	6	-17	25	50
NJU-Ba-1@07		2023-08-21	22:11:00	0.85723	1210000000	0.040156	2450000	0.0481271	0.00201982	0.0145709			7.29104	-0.240008	7.69999	0.291419			-254	5213	0	-19	28	51
NJU-Ba-1@08		2023-08-21	22:16:00	0.85	1200000000	0.0652368	2420000	0.0699949	0.00202013	0.0149389			7.44564	-0.0865656	7.85343	0.298779			-233	5309	-1	-19	29	48
NJU-Ba-1@09		2023-08-21	22:22:00	0.86	1200000000	0.0721838	2430000	0.0723645	0.00202033	0.0150804			7.54538	0.0124294	7.95243	0.301608			-183	5309	6	-20	25	47
NJU-Ba-1@10		2023-08-21	22:27:00	0.85	1190000000	0.0770579	2410000	0.0811974	0.00202011	0.0148178			7.43567	-0.0964651	7.84353	0.296356			-183	5259	5	-16	27	49
NJU-Ba-1@11		2023-08-21	22:33:00	0.85	1200000000	0.0539571	2420000	0.0545177	0.00202048	0.0159541			7.62019	0.0866756	8.02668	0.319081			-183	5209	6	-20	25	48
NJU-Ba-1@12		2023-08-21	22:38:00	0.85	1190000000	0.10295	2410000	0.103085	0.00202046	0.0148162			7.61021	0.0767761	8.01678	0.296324			-183	5159	6	-16	26	50
NJU-Ba-1@13		2023-08-21	22:44:00	0.85	1200000000	0.0770461	2430000	0.0778512	0.00202002	0.0166449			7.39078	-0.141013	7.79899	0.332897			-133	5159	2	-14	29	51
NJU-Ba-1@14		2023-08-21	22:49:00	0.84	1190000000	0.0701627	2400000	0.0716943	0.00201982	0.0150084			7.29104	-0.240008	7.69999	0.300169			-83	5159	7	-16	26	50
NJU-Ba-1@15		2023-08-21	22:55:00	0.84	1190000000	0.0499597	2390000	0.0502343	0.0020199	0.0160748			7.33094	-0.20041	7.73959	0.321496			-83	5259	7	-16	25	50
NJU-Ba-1@16		2023-08-21	23:00:00	0.84	1190000000	0.0450328	2400000	0.0538108	0.00202087	0.0193377			7.81468	0.279716	8.21972	0.386754			-83	5309	8	-18	23	50
NJU-Ba-1@17		2023-08-21	23:06:00	0.83	1180000000	0.0153024	2390000	0.0151156	0.00202013	0.0114283			7.44564	-0.0865656	7.85343	0.228567			-83	5359	7	-16	26	50
NJU-Ba-1@18		2023-08-21	23:11:00	0.84	1190000000	0.0821984	2400000	0.0821147	0.00202061	0.0152323			7.68502	0.151022	8.09102	0.304646			-83	5409	8	-19	25	50
NJU-Ba-1@19		2023-08-21	23:17:00	0.83	1190000000	0.0719632	2400000	0.0673401	0.00202065	0.0141542			7.70497	0.170821	8.11082	0.283083			-83	5459	7	-16	27	51
NJU-Ba-1@20		2023-08-21	23:22:00	0.83	1180000000	0.038992	2390000	0.0442435	0.00202041	0.0160545			7.58528	0.0520274	7.99203	0.321091			-33	5459	2	-15	30	51
NJU-Ba-1@21		2023-08-21	23:28:00	0.841527	1200000000	0.0468557	2420000	0.0486597	0.00202067	0.0136653			7.71494	0.180721	8.12072	0.273306			-33	5409	5	-18	27	48
NJU-Ba-1@22		2023-08-21	23:33:00	0.837387	1190000000	0.0611764	2400000	0.0583533	0.00202053	0.0151208			7.64512	0.111424	8.05142	0.302415			-33	5359	3	-14	29	51
NJU-Ba-1@23		2023-08-21	23:39:00	0.836491	1190000000	0.0235153	2400000	0.0281666	0.00202026	0.0120982			7.51047	-0.0222189	7.91778	0.241964			-33	5309	2	-19	28	49
NJU-Ba-1@24		2023-08-21	23:44:00	0.841763	1200000000	0.0351284	2420000	0.0380005	0.00201989	0.0144985			7.32595	-0.20536	7.73464	0.289969			-33	5259	2	-14	30	50
NJU-Ba-1@25		2023-08-21	23:50:00	0.839142	1180000000	0.0780174	2380000	0.0781264	0.0020202	0.0123816			7.48055	-0.0519174	7.88808	0.247633			17	5309	8	-20	25	49
NJU-Ba-1@26		2023-08-21	23:55:00	0.845221	1200000000	0.0853471	2420000	0.0823529	0.00202008	0.0133937			7.42071	-0.111314	7.82869	0.267874			17	5359	8	-15	27	51
NJU-Ba-1@27		2023-08-22	00:01:00	0.842484	1200000000	0.015115	2420000	0.0200458	0.00202022	0.0106039			7.49052	-0.0420179	7.89798	0.212079			17	5459	7	-16	27	50
NJU-Ba-1@28		2023-08-22	00:06:00	0.842199	1190000000	0.0352255	2410000	0.0393979	0.00202053	0.0200485			7.64512	0.111424	8.05142	0.40097			17	5509	9	-19	25	49
NJU-Ba-1@29		2023-08-22	00:12:00	0.84231	1190000000	0.06553	2410000	0.0688666	0.00202091	0.0138157			7.83463	0.299515	8.23951	0.276314			17	5559	8	-16	26	50
NJU-Ba-1@30		2023-08-22	00:17:00	0.840705	1200000000	0.0312621	2420000	0.0328918	0.00202036	0.0163912			7.56034	0.0272786	7.96728	0.327825			17	5609	9	-19	25	48
NJU-Ba-1@31		2023-08-22	00:23:00	0.843232	1190000000	0.0519457	2410000	0.0534856	0.00202016	0.0121656			7.4606	-0.0717163	7.86828	0.243312			67	5559	4	-15	29	49
NJU-Ba-1@32		2023-08-22	00:28:00	0.843491	1200000000	0.0676173	2420000	0.0637502	0.00202074	0.0125652			7.74985	0.215369	8.15537	0.251304			67	5459	3	-15	29	50
NJU-Ba-1@33		2023-08-22	00:34:00	0.842216	1200000000	0.0288859	2420000	0.0330203	0.00202002	0.0154929			7.39078	-0.141013	7.79899	0.309858			67	5359	3	-14	28	52
NJU-Ba-1@34		2023-08-22	00:39:00	0.853627	1200000000	0.0918145	2430000	0.0938334	0.00202056	0.0132327			7.66008	0.126274	8.06627	0.264654			67	5309	3	-18	27	49
NJU-Ba-1@35		2023-08-22	00:45:00	0.839787	1190000000	0.0481018	2400000	0.0527129	0.00202005	0.0128266			7.40575	-0.126164	7.81384	0.256533			67	5209	5	-18	25	51
NJU-Ba-1@36		2023-08-22	00:50:00	0.843125	1190000000	0.0439311	2410000	0.0456938	0.00202074	0.0156696			7.74985	0.215369	8.15537	0.313393			67	5159	3	-14	28	53
NJU-Ba-1@37		2023-08-22	00:56:00	0.845688	1200000000	0.0312931	2420000	0.0385823	0.00201999	0.0150472			7.37582	-0.155862	7.78414	0.300945			67	5109	5	-17	25	51
NJU-Ba-1@38		2023-08-22	01:01:00	0.839306	1190000000	0.0595282	2410000	0.0579915	0.00202115	0.0112514			7.95432	0.418309	8.35831	0.225029			67	5059	5	-14	27	52
NJU-Ba-1@39		2023-08-22	01:07:00	0.829321	1180000000	0.0448943	2380000	0.0403809	0.00202046	0.0177012			7.61021	0.0767761	8.01678	0.354024			117	5059	9	-14	26	52
NJU-Ba-1@40		2023-08-22	01:12:00	0.8381	1200000000	0.02395	2420000	0.0322657	0.00202044	0.0155069			7.60024	0.0668766	8.00688	0.310139			117	5109	10	-17	25	51
NJU-Ba-1@41		2023-08-22	01:18:00	0.837905	1190000000	0.1045	2400000	0.105541	0.00202004	0.0155649			7.40076	-0.131113	7.80889	0.311297			117	5159	10	-13	27	53
NJU-Ba-1@42		2023-08-22	01:23:00	0.825121	1180000000	0.01809	2380000	0.026237	0.00202063	0.0162003			7.69499	0.160922	8.10092	0.324006			117	5209	10	-16	25	52
NJU-Ba-1@43		2023-08-22	01:29:00	0.830605	1180000000	0.069453	2380000	0.0714097	0.00202014	0.014134			7.45063	-0.0816158	7.85838	0.28268			117	5259	10	-14	26	53
NJU-Ba-1@44		2023-08-22	01:34:00	0.828706	1180000000	0.075574	2380000	0.071909	0.00202022	0.0137742			7.49052	-0.0420179	7.89798	0.275484			117	5309	9	-17	26	51
NJU-Ba-1@45		2023-08-22	01:40:00	0.816058	1170000000	0.0649849	2360000	0.0657108	0.00202063	0.0176486			7.69499	0.160922	8.10092	0.352971			117	5359	9	-14	26	51
NJU-Ba-1@46		2023-08-22	01:45:00	0.812341	1160000000	0.0118534	2350000	0.0213492	0.00202014	0.0163712			7.45063	-0.0816158	7.85838	0.327424			117	5409	11	-18	24	50
NJU-Ba-1@47		2023-08-22	01:51:00	0.821549	1160000000	0.11518	2340000	0.118034	0.00202002	0.015719			7.39078	-0.141013	7.79899	0.31438			117	5509	9	-18	24	48
NJU-Ba-1@48		2023-08-22	01:56:00	0.81169	1160000000	0.029834	2350000	0.0293681	0.00202043	0.0189468			7.59525	0.0619268	8.00193	0.378937			117	5559	9	-16	27	50
NJU-Ba-1@49		2023-08-22	02:02:00	0.812856	1160000000	0.0660668	2340000	0.0657648	0.00202059	0.0180312			7.67504	0.141123	8.08112	0.360625			117	5609	10	-18	24	49
NJU-Ba-1@50		2023-08-22	02:07:00	0.814886	1160000000	0.036018	2350000	0.04016	0.00202	0.0197516			7.38081	-0.150912	7.78909	0.395032			117	5659	9	-16	26	50
NJU-Ba-1@51		2023-08-22	02:13:00	0.811192	1160000000	0.0663234	2340000	0.0686548	0.0020206	0.0148823			7.68003	0.146073	8.08607	0.297646			167	5659	7	-15	27	49
NJU-Ba-1@52		2023-08-22	02:18:00	0.817434	1170000000	0.0751577	2360000	0.0742006	0.00201993	0.014185			7.3459	-0.185561	7.75444	0.2837			167	5609	7	-18	27	48
NJU-Ba-1@53		2023-08-22	02:24:00	0.818391	1160000000	0.0699028	2350000	0.0763015	0.00202022	0.0169747			7.49052	-0.0420179	7.89798	0.339495			167	5559	5	-15	28	49
NJU-Ba-1@54		2023-08-22	02:29:00	0.821976	1160000000	0.153734	2340000	0.155567	0.00202036	0.0146748			7.56034	0.0272786	7.96728	0.293497			167	5509	6	-18	27	49
NJU-Ba-1@55		2023-08-22	02:35:00	0.918532	1270000000	0.126899	2570000	0.12958	0.00202027	0.012482			7.51546	-0.0172691	7.92273	0.24964			167	5409	-2	-17	31	51
NJU-Ba-1@56		2023-08-22	02:40:00	0.969852	1330000000	0.143733	2690000	0.147338	0.00202004	0.0125533			7.40076	-0.131113	7.80889	0.251066			-4804	3650	-27	-28	27	44
NJU-Ba-1@57		2023-08-22	02:46:00	0.991365	1360000000	0.106594	2750000	0.107123	0.00202026	0.0130254			7.51047	-0.0222189	7.91778	0.260508			-4804	3600	-27	-26	27	46
NJU-Ba-1@58		2023-08-22	02:51:00	1.00592	1390000000	0.111013	2810000	0.109462	0.00202036	0.00900034			7.56034	0.0272786	7.96728	0.180007			-4814	3531	-37	-23	33	52
NJU-Ba-1@59		2023-08-22	02:57:00	0.999501	1370000000	0.0988643	2770000	0.100513	0.00202031	0.0124893			7.53541	0.00252987	7.94253	0.249786			-4784	3464	-25	-27	25	48
NJU-Ba-1@60		2023-08-22	03:02:00	1.01296	1410000000	0.0766778	2840000	0.0790778	0.00202026	0.0158196			7.51047	-0.0222189	7.91778	0.316392			-4900	3435	-26	-25	30	50
NJU-Ba-1@61		2023-08-22	03:08:00	1.00912	1390000000	0.0985466	2800000	0.0976889	0.00202013	0.00866752			7.44564	-0.0865656	7.85343	0.17335			-5715	3288	-35	-30	28	43
NJU-Ba-1@62		2023-08-22	03:13:00	1.00459	1390000000	0.0300367	2810000	0.0339412	0.00202003	0.0150519			7.39577	-0.136063	7.80394	0.301037			-5715	3238	-34	-33	28	43
NJU-Ba-1@63		2023-08-22	03:19:00	1.00161	1390000000	0.0522348	2800000	0.0516285	0.00201977	0.0143084			7.26611	-0.264757	7.67524	0.286168			-5715	3138	-33	-33	27	45
NJU-Ba-1@64		2023-08-22	03:24:00	1.00216	1380000000	0.0917134	2780000	0.0949553	0.00202003	0.0126497			7.39577	-0.136063	7.80394	0.252995			-5715	3088	-33	-29	27	45
NJU-Ba-1@65		2023-08-22	03:30:00	0.992226	1370000000	0.0726275	2770000	0.0753649	0.00202021	0.0124345			7.48554	-0.0469676	7.89303	0.24869			-5665	2988	-41	-26	30	48
NJU-Ba-1@66		2023-08-22	03:35:00	0.99426	1380000000	0.0973998	2790000	0.0948957	0.00202013	0.0149344			7.44564	-0.0865656	7.85343	0.298687			-5665	2938	-40	-28	30	48
NJU-Ba-1@67		2023-08-22	03:41:00	1.00435	1390000000	0.027531	2810000	0.0306484	0.00202012	0.010156			7.44065	-0.0915153	7.84848	0.20312			-5615	2988	-32	-28	28	47
NJU-Ba-1@68		2023-08-22	03:46:00	1.01139	1390000000	0.0926084	2810000	0.0972627	0.0020201	0.0128891			7.43068	-0.101415	7.83859	0.257782			-5615	3038	-31	-31	26	48
NJU-Ba-1@69		2023-08-22	03:52:00	1.02547	1420000000	0.0525533	2860000	0.0546562	0.00202015	0.0129267			7.45562	-0.0766661	7.86333	0.258534			-5615	3088	-31	-28	26	48
NJU-Ba-1@70		2023-08-22	03:57:00	1.02414	1410000000	0.131703	2850000	0.129771	0.00202011	0.0130139			7.43567	-0.0964651	7.84353	0.260279			-5615	3138	-31	-31	25	46
NJU-Ba-1@71		2023-08-22	04:03:00	1.03	1410000000	0.0838838	2860000	0.0879267	0.00202043	0.013093			7.59525	0.0619268	8.00193	0.26186			-5615	3188	-31	-29	25	46
NJU-Ba-1@72		2023-08-22	04:08:00	1.02	1410000000	0.0766655	2850000	0.0772407	0.0020203	0.010488			7.53042	-0.00241988	7.93758	0.20976			-5615	3238	-32	-32	25	44
NJU-Ba-1@73		2023-08-22	04:14:00	1.02	1400000000	0.0897841	2840000	0.0961537	0.00202059	0.0132104			7.67504	0.141123	8.08112	0.264208			-5565	3238	-47	-27	34	47
NJU-Ba-1@74		2023-08-22	04:19:00	1.02	1410000000	0.072742	2850000	0.0741197	0.00202011	0.0127278			7.43567	-0.0964651	7.84353	0.254556			-5565	3138	-44	-27	32	47
NJU-Ba-1@75		2023-08-22	04:25:00	1.03	1430000000	0.0248557	2890000	0.0232016	0.00202006	0.0102113			7.41073	-0.121214	7.81879	0.204227			-5565	3088	-42	-26	32	48
NJU-Ba-1@76		2023-08-22	04:30:00	1.05	1440000000	0.134373	2910000	0.134235	0.0020205	0.0128688			7.63016	0.0965751	8.03658	0.257377			-5565	2988	-39	-26	30	49
NJU-Ba-1@77		2023-08-22	04:36:00	1.03	1420000000	0.0549542	2870000	0.0539061	0.00202035	0.0114535			7.55536	0.0223289	7.96233	0.229071			-5565	2938	-43	-27	30	48
NJU-Ba-1@78		2023-08-22	04:41:00	1.03	1420000000	0.0308003	2860000	0.0290299	0.00202065	0.00938082			7.70497	0.170821	8.11082	0.187616			-3728	3012	-16	-24	28	48
NJU-Ba-1@79		2023-08-22	04:47:00	1.02	1410000000	0.0732396	2850000	0.0721469	0.00202027	0.0164685			7.51546	-0.0172691	7.92273	0.32937			-3678	3012	-28	-21	33	50
NJU-Ba-1@80		2023-08-22	04:52:00	1.02	1410000000	0.0783176	2850000	0.0766422	0.00202006	0.0101062			7.41073	-0.121214	7.81879	0.202124			-3628	3012	-15	-24	28	48
NJU-Ba-1@81		2023-08-22	04:58:00	1.01	1390000000	0.0656975	2800000	0.0691803	0.0020205	0.0126981			7.63016	0.0965751	8.03658	0.253961			-3543	3071	-16	-24	27	47
NJU-Ba-1@82		2023-08-22	05:03:00	1.01	1390000000	0.0700583	2810000	0.0653583	0.00202039	0.0110344			7.5753	0.0421279	7.98213	0.220689			-3543	3021	-16	-27	27	47
NJU-Ba-1@83		2023-08-22	05:09:00	1	1380000000	0.0506669	2790000	0.0531626	0.00202042	0.0121263			7.59027	0.0569771	7.99698	0.242527			-3493	3071	-25	-21	33	48
NJU-Ba-1@84		2023-08-22	05:14:00	1.01	1390000000	0.0523861	2800000	0.0521064	0.00202026	0.0126819			7.51047	-0.0222189	7.91778	0.253638			-3493	2921	-21	-24	30	51
NJU-Ba-1@85		2023-08-22	05:20:00	1.01	1390000000	0.0396	2810000	0.0359369	0.00202035	0.0091454			7.55536	0.0223289	7.96233	0.182908			-3543	2921	-14	-26	25	49
NJU-Ba-1@86		2023-08-22	05:25:00	0.99	1370000000	0.0298064	2760000	0.0320192	0.00202064	0.0142416			7.69998	0.165872	8.10587	0.284833			-4003	3028	-19	-24	27	47
NJU-Ba-1@87		2023-08-22	05:31:00	0.99	1360000000	0.0630828	2750000	0.0634614	0.00202067	0.00882524			7.71494	0.180721	8.12072	0.176505			-4003	2978	-19	-26	27	47
NJU-Ba-1@88		2023-08-22	05:36:00	1	1380000000	0.0549089	2780000	0.0548695	0.00202004	0.0143459			7.40076	-0.131113	7.80889	0.286917			-4103	2978	-20	-26	29	47
NJU-Ba-1@89		2023-08-22	05:42:00	1	1380000000	0.0977565	2790000	0.0960994	0.00202019	0.0107138			7.47556	-0.0568671	7.88313	0.214275			-4153	2978	-29	-24	32	48
NJU-Ba-1@90		2023-08-22	05:47:00	1.01	1390000000	0.0818194	2800000	0.0836604	0.00202019	0.0115111			7.47556	-0.0568671	7.88313	0.230221			-4153	3028	-26	-23	32	49
												AVE	7.53286	0	7.94
												2SD	0.284198	0.28	0.282074

## Sheet: Table S4
Table S4. δ18O values of 27 NJU-Ba-1 fragments
		Date	Start time	Ipr (nA)	16O/Coeff	1se(%)	18O/Coeff	1se(%)	18O/16O	1se(%)		δ18O (‰, raw)	δ18O (‰, VSMOW)
Sample #					L'2		H'2		H'2/L'2
NJU-Ba-1-1@01		2022-11-08	21:17:00	1.01429	1751233000	0.175424	3598490	0.169582	0.00205484	0.0146126		24.7536	7.90698
NJU-Ba-1-1@02		2022-11-08	21:23:00	1.0135	1761968000	0.23393	3620543	0.224934	0.00205484	0.0178354		24.7546	7.90795	NJU-Ba-1-G1	N=4
NJU-Ba-1-1@03		2022-11-08	21:28:00	1.01038	1816285000	0.26984	3730225	0.259883	0.00205378	0.0122959		24.2255	7.39163	AVE	24.5914	7.7487
NJU-Ba-1-1@04		2022-11-08	21:33:00	1.01202	1746078000	0.384642	3587449	0.373885	0.00205459	0.0168786		24.632	7.78824	2SD	0.501313	0.489188
NJU-Ba-1-2@01		2022-11-08	21:38:00	1.011	1732213000	0.166073	3558651	0.161997	0.0020544	0.0112519		24.5357	7.69432	NJU-Ba-1-G2	N=3
NJU-Ba-1-2@02		2022-11-08	21:44:00	1.01217	1743405000	0.491372	3581647	0.481527	0.00205442	0.0135011		24.5447	7.70308	AVE	24.6542	7.80998
NJU-Ba-1-2@03		2022-11-08	21:49:00	1.01335	1760635000	0.212962	3618268	0.211956	0.00205509	0.0106026		24.8823	8.03253	2SD	0.395137	0.38558
NJU-Ba-1-3@01		2022-11-08	21:54:00	1.01225	1759255000	0.31265	3616462	0.305722	0.00205569	0.01476		25.1775	8.32063	NJU-Ba-1-G3	N=3
NJU-Ba-1-3@02		2022-11-08	21:59:00	1.01155	1741085000	0.215905	3578840	0.214597	0.00205552	0.0116392		25.0967	8.24179	AVE	25.0048	8.15209
NJU-Ba-1-3@03		2022-11-08	22:05:00	1.01131	1753888000	0.318626	3603895	0.313813	0.00205481	0.00996001		24.7402	7.89384	2SD	0.465444	0.454186
NJU-Ba-1-4@01		2022-11-08	22:10:00	1.00944	1732698000	0.324572	3560638	0.31665	0.00205498	0.0148047		24.8245	7.97608	NJU-Ba-1-G4	N=3
NJU-Ba-1-4@02		2022-11-08	22:15:00	1.01202	1774456000	0.352222	3646022	0.348867	0.00205473	0.0117389		24.7013	7.85588	AVE	24.7952	7.94753
NJU-Ba-1-4@03		2022-11-08	22:20:00	1.01241	1756142000	0.247507	3608940	0.238222	0.00205505	0.0154343		24.8599	8.01064	2SD	0.166487	0.16246
NJU-Ba-1-5@01		2022-11-08	22:26:00	1.01491	1776646000	0.325274	3651542	0.315892	0.00205531	0.0139453		24.992	8.1396
NJU-Ba-1-5@02		2022-11-08	22:31:00	1.01382	1753801000	0.311115	3604406	0.303357	0.00205521	0.0118726		24.9382	8.08704
NJU-Ba-1-5@03		2022-11-08	22:36:00	1.01499	1797341000	0.333185	3692474	0.323443	0.00205442	0.015692		24.5477	7.706
NJU-Ba-1-5@04		2022-11-08	22:41:00	1.01178	1758436000	0.186129	3613043	0.179817	0.0020547	0.0132585		24.6838	7.83885
NJU-Ba-1-5@05		2022-11-08	22:47:00	1.00967	1703611000	0.301609	3500409	0.290793	0.00205471	0.0156554		24.6923	7.84712	NJU-Ba-1-G5	N=7
NJU-Ba-1-5@06		2022-11-08	22:52:00	1.01084	1718857000	0.223386	3533381	0.229345	0.00205565	0.015016		25.1611	8.30457	AVE	24.8601	8.01091
NJU-Ba-1-5@07		2022-11-08	22:57:00	1.00975	1755154000	0.237351	3607436	0.234411	0.00205534	0.00922546		25.006	8.15322	2SD	0.441368	0.430692
NJU-Ba-1-6@01		2022-11-09	10:58:00	1.04276	1840039000	0.241788	3782867	0.232365	0.00205587	0.0151441		25.2703	8.18978
NJU-Ba-1-6@02		2022-11-09	11:04:00	1.04198	1853922000	0.240648	3810484	0.230195	0.00205537	0.018344		25.0219	7.94749
NJU-Ba-1-6@03		2022-11-09	11:09:00	1.04026	1826801000	0.222592	3754840	0.218088	0.00205542	0.0140831		25.0464	7.97133
NJU-Ba-1-6@04		2022-11-09	11:15:00	1.03901	1830815000	0.263861	3763621	0.259072	0.00205571	0.018114		25.1915	8.11291
NJU-Ba-1-6@05		2022-11-09	11:20:00	1.03697	1829861000	0.23191	3761635	0.226017	0.0020557	0.0138484		25.1845	8.1061	NJU-Ba-1-G6	N=7
NJU-Ba-1-6@06		2022-11-09	11:26:00	1.03893	1827249000	0.218217	3755395	0.211833	0.00205522	0.0165689		24.9466	7.87402	AVE	25.0898	8.01373
NJU-Ba-1-6@07		2022-11-09	11:31:00	1.03674	1840335000	0.295984	3782356	0.286564	0.00205527	0.0133769		24.9676	7.89446	2SD	0.250088	0.243985
NJU-Ba-1-7@01		2022-11-09	11:37:00	1.03752	1800932000	0.457114	3701838	0.444698	0.00205553	0.0179159		25.1017	8.02533	NJU-Ba-1-G7	N=3
NJU-Ba-1-7@02		2022-11-09	11:42:00	1.03901	1824135000	0.284909	3750342	0.277503	0.00205596	0.0144039		25.3167	8.23503	AVE	25.2706	8.19011
NJU-Ba-1-7@03		2022-11-09	11:48:00	1.03838	1783383000	0.406855	3666815	0.396116	0.00205612	0.0155026		25.3935	8.30996	2SD	0.302447	0.295066
NJU-Ba-1-8@01		2022-11-09	11:53:00	1.03752	1829394000	0.207061	3760282	0.198908	0.00205549	0.0113891		25.0783	8.00247	NJU-Ba-1-G8	N=3
NJU-Ba-1-8@02		2022-11-09	11:59:00	1.04057	1823672000	0.240617	3748262	0.232192	0.00205535	0.0133601		25.008	7.93387	AVE	25.1228	8.04593
NJU-Ba-1-8@03		2022-11-09	12:04:00	1.03956	1827938000	0.18467	3758051	0.185118	0.0020559	0.015342		25.2823	8.20146	2SD	0.284934	0.277981
NJU-Ba-1-9@01		2022-11-09	12:10:00	1.03971	1832924000	0.337568	3766666	0.327347	0.00205502	0.0141555		24.8439	7.7738	NJU-Ba-1-G9	N=3
NJU-Ba-1-9@02		2022-11-09	12:15:00	1.03823	1877061000	0.424414	3856642	0.414362	0.00205463	0.0177916		24.6529	7.58745	AVE	24.8075	7.73828
NJU-Ba-1-9@03		2022-11-09	12:21:00	1.03619	1836476000	0.341724	3774266	0.332168	0.00205518	0.0139098		24.9257	7.85359	2SD	0.279984	0.273151
NJU-Ba-1-10@01		2022-11-09	12:26:00	1.02242	1838277000	1.26485	3779002	1.25956	0.00205576	0.0153167		25.2159	8.13675	NJU-Ba-1-G10	N=3
NJU-Ba-1-10@02		2022-11-09	12:32:00	1.02719	1796668000	0.715866	3693633	0.706072	0.00205585	0.0126235		25.2603	8.18005	AVE	25.1204	8.0435
NJU-Ba-1-10@03		2022-11-09	12:37:00	1.02806	1855141000	0.331066	3812471	0.32011	0.0020551	0.0161785		24.8848	7.81369	2SD	0.410399	0.400384
NJU-Ba-1-11@01		2022-11-09	12:43:00	1.02759	1820299000	0.352065	3739798	0.3459	0.0020545	0.00983685		24.5881	7.52421
NJU-Ba-1-11@02		2022-11-09	12:49:00	1.0268	1813631000	0.467423	3726857	0.459751	0.00205493	0.0139836		24.7995	7.7305
NJU-Ba-1-11@03		2022-11-09	12:54:00	1.02845	1833766000	0.221159	3769055	0.217405	0.00205537	0.0112338		25.018	7.9436	NJU-Ba-1-G11	N=5
NJU-Ba-1-11@04		2022-11-09	13:00:00	1.02766	1855442000	0.184285	3811830	0.172075	0.00205441	0.0164561		24.5432	7.48042	AVE	24.7571	7.68914
NJU-Ba-1-11@05		2022-11-09	13:05:00	1.0286	1845978000	0.491026	3793426	0.473477	0.002055	0.0212209		24.8369	7.76699	2SD	0.388001	0.378533
NJU-Ba-1-12@01		2022-11-09	13:11:00	1.0261	1791384000	0.175254	3681937	0.174613	0.00205536	0.0100494		25.0145	7.94019
NJU-Ba-1-12@02		2022-11-09	13:16:00	1.0279	1836113000	0.312227	3773683	0.306316	0.00205527	0.0157542		24.9676	7.89446	NJU-Ba-1-G12	N=3
NJU-Ba-1-12@03		2022-11-09	13:22:00	1.02782	1812811000	0.285616	3725698	0.27677	0.00205521	0.0138432		24.9426	7.87013	AVE	25.0052	7.93119
NJU-Ba-1-12@04		2022-11-09	13:27:00	1.02727	1828913000	0.306615	3759368	0.304142	0.00205552	0.00947051		25.0962	8.01998	2SD	0.135171	0.131872
NJU-Ba-1-19@01		2022-11-09	19:33:00	2.01401	3104019000	0.506992	6389450	0.503007	0.00205845	0.0076867		26.557	8.17314
NJU-Ba-1-19@02		2022-11-09	19:39:00	2.01839	3132915000	0.543168	6447376	0.540735	0.00205795	0.00748955		26.3081	7.93066	NJU-Ba-1-G13	N=4
NJU-Ba-1-19@03		2022-11-09	19:44:00	2.01761	3128335000	0.525625	6438415	0.521622	0.0020581	0.00771334		26.3834	8.00404	AVE	26.3962	8.01655
NJU-Ba-1-19@04		2022-11-09	19:50:00	2.02152	3137896000	0.529536	6457798	0.525986	0.00205801	0.00598489		26.3365	7.95836	2SD	0.223093	0.217372
NJU-Ba-1-20@01		2022-11-09	19:55:00	2.01479	3115683000	0.537299	6411352	0.53438	0.00205777	0.0065721		26.2188	7.84368	NJU-Ba-1-G14	N=3
NJU-Ba-1-20@02		2022-11-09	20:06:00	2.01142	3123029000	0.528096	6425934	0.523521	0.00205761	0.00661821		26.135	7.76205	AVE	26.2353	7.85972
NJU-Ba-1-20@03		2022-11-09	20:12:00	2.00955	3103889000	0.532438	6387924	0.531072	0.00205804	0.00644336		26.352	7.97342	2SD	0.218801	0.21319
NJU-Ba-1-21@01		2022-11-09	20:17:00	2.01049	3131459000	0.523606	6443921	0.52094	0.00205781	0.00646308		26.2353	7.85972	NJU-Ba-1-G15	N=3
NJU-Ba-1-21@02		2022-11-09	20:23:00	2.00704	3116910000	0.542683	6414562	0.538258	0.002058	0.00671965		26.33	7.95204	AVE	26.1937	7.81923
NJU-Ba-1-21@03		2022-11-09	20:28:00	2.00384	3157894000	0.597027	6496923	0.593866	0.00205737	0.00627897		26.0159	7.64592	2SD	0.322323	0.314058
NJU-Ba-1-22@01		2022-11-29	11:06:00	2.01565	2880280000	0.637185	5939916	0.631671	0.00206228	0.00822972		28.468	8.25986
NJU-Ba-1-22@02		2022-11-29	11:11:00	2.01479	2904383000	0.545379	5987072	0.538702	0.00206141	0.00961764		28.0301	7.83398
NJU-Ba-1-22@03		2022-11-29	11:16:00	2.01197	2874209000	0.614655	5925881	0.612806	0.00206175	0.00679658		28.2007	7.99987	NJU-Ba-1-G16	N=5
NJU-Ba-1-22@04		2022-11-29	11:21:00	2.01463	2867414000	0.574917	5910616	0.567958	0.00206132	0.00921955		27.9877	7.79275	AVE	28.2068	8.00579
NJU-Ba-1-22@05		2022-11-29	11:27:00	2.01667	2849945000	0.651077	5876680	0.647681	0.00206204	0.00839848		28.3473	8.14248	2SD	0.408901	0.397709
NJU-Ba-1-23@01		2022-11-29	11:32:00	2.01268	2918168000	0.569218	6015494	0.565422	0.0020614	0.0092627		28.0281	7.83204
NJU-Ba-1-23@02		2022-11-29	11:37:00	2.01088	2732171000	0.655912	5640934	0.65244	0.00206464	0.00857292		29.6444	9.4041
NJU-Ba-1-23@03		2022-11-29	11:42:00	2.01275	2884938000	0.582951	5946818	0.579261	0.00206134	0.00739731		27.9977	7.80245
NJU-Ba-1-23@04		2022-11-29	11:48:00	2.01526	2898741000	0.627089	5976247	0.62268	0.00206168	0.0082083		28.1673	7.96737
NJU-Ba-1-23@05		2022-11-29	11:53:00	2.01174	2882343000	0.570944	5941261	0.568558	0.00206127	0.00670085		27.9603	7.76607	NJU-Ba-1-G17	N=6
NJU-Ba-1-23@06		2022-11-29	11:58:00	2.01588	2934962000	0.576485	6048954	0.574628	0.002061	0.00746787		27.8296	7.63899	AVE	28.0563	7.85945
NJU-Ba-1-23@07		2022-11-29	12:03:00	2.00673	2862878000	0.615915	5903404	0.614015	0.00206206	0.00783077		28.3548	8.14975	2SD	0.364656	0.354676
NJU-Ba-1-24@01		2022-11-29	13:27:00	2.01111	2907317000	0.531315	5993154	0.529843	0.00206141	0.00557008		28.0306	7.83447
NJU-Ba-1-24@02		2022-11-29	13:32:00	2.00696	2926958000	0.532361	6033761	0.526791	0.00206146	0.010672		28.0551	7.85823
NJU-Ba-1-24@03		2022-11-29	13:37:00	2.00532	2932340000	0.599413	6044614	0.597457	0.00206137	0.00607915		28.0107	7.81506
NJU-Ba-1-24@04		2022-11-29	13:42:00	2.00532	2862135000	0.557727	5902137	0.553399	0.00206215	0.00776139		28.4037	8.19729
NJU-Ba-1-24@05		2022-11-29	13:48:00	2.00438	2891880000	0.494532	5962328	0.490504	0.00206176	0.00977482		28.2047	8.00375
NJU-Ba-1-24@06		2022-11-29	13:53:00	2.00305	2908139000	0.54923	5995867	0.545901	0.00206176	0.00685721		28.2072	8.00618
NJU-Ba-1-24@07		2022-11-29	13:58:00	2.00485	2875848000	0.657434	5929235	0.652981	0.00206175	0.00750574		28.1997	7.9989	NJU-Ba-1-G18	N=9
NJU-Ba-1-24@08		2022-11-29	14:03:00	2.0083	2894281000	0.557329	5965387	0.553272	0.0020611	0.00851866		27.8795	7.68749	AVE	28.145	7.94576
NJU-Ba-1-24@09		2022-11-29	14:09:00	2.00337	2896110000	0.53356	5971691	0.530247	0.00206198	0.00751069		28.3144	8.11046	2SD	0.328409	0.31942
NJU-Ba-1-25@01		2022-11-29	14:14:00	2.00673	2918821000	0.745066	6017099	0.73948	0.0020615	0.00843142		28.0765	7.87909	NJU-Ba-1-G19	N=3
NJU-Ba-1-25@02		2022-11-29	14:19:00	1.99946	2895498000	0.603751	5969928	0.600678	0.0020618	0.00691016		28.2286	8.02703	AVE	28.1698	7.9698
NJU-Ba-1-25@03		2022-11-29	14:25:00	2.00258	2870737000	0.605805	5918705	0.598459	0.00206176	0.0106849		28.2042	8.00326	2SD	0.163365	0.158894
NJU-Ba-1-26@01		2022-11-29	14:30:00	1.9982	2869277000	0.544061	5916129	0.541864	0.00206189	0.00721406		28.273	8.0702	NJU-Ba-1-G20	N=3
NJU-Ba-1-26@02		2022-11-29	14:35:00	1.99938	2852850000	0.592451	5882265	0.591374	0.00206189	0.00739177		28.273	8.0702	AVE	28.273	8.0702
														2SD	0	0
NJU-Ba-1-27@01		2022-11-29	14:40:00	2.00423	2900669000	0.656504	5978817	4	0.00206119	0.00829712		27.9244	7.73115	NJU-Ba-1-G21	N=3
NJU-Ba-1-27@02		2022-11-29	14:46:00	2.00094	2889315000	0.555241	5956851	0.551397	0.00206169	0.00804144		28.1723	7.97222	AVE	28.0544	7.85759
NJU-Ba-1-27@03		2022-11-29	14:51:00	2.00188	2880282000	0.488904	5937620	0.485106	0.00206148	0.00887151		28.0665	7.86939	2SD	0.248745	0.241937
														NJU-Ba-1	M=21	N=86
														AVE	7.93929	7.93655
														2SD	0.268161	0.379583

## Sheet: Table S5
Table S5. δ18O values in 16 FJ fragments
Session 1-5		Date	Start time	Ipr (nA)	16O/Coeff	1se(%)	18O/Coeff	1se(%)	18O/16O	1se(%)		raw δ18O (‰)	δ18O (‰, VSMOW)
Sample #					L'2		H'2		H'2/L'2
FJ-G1@02		2023-04-21	14:26:00	1.89494	2644419000	0.517966	5353789	0.514403	0.00202457	0.00735509		9.65939	7.54987
FJ-G1@03		2023-04-21	14:32:00	1.89118	2630742000	0.508689	5326458	0.502927	0.00202471	0.00775082		9.7297	7.62004
FJ-G1@04		2023-04-21	14:37:00	1.88751	2628656000	0.49793	5321810	0.496882	0.00202454	0.00560833		9.64393	7.53444
FJ-G1@05		2023-04-21	14:43:00	1.8915	2630233000	0.507526	5325487	0.504694	0.00202473	0.00585022		9.73768	7.628
FJ-G1@06		2023-04-21	14:54:00	1.89893	2643969000	0.502378	5353862	0.497244	0.00202494	0.00793693		9.8464	7.73649
FJ-G1@07		2023-04-21	14:59:00	1.89549	2645702000	0.49375	5355241	0.490496	0.00202413	0.00729206		9.44295	7.33388
FJ-G1@08		2023-04-21	15:05:00	1.89228	2633391000	0.503208	5331182	0.499055	0.00202446	0.00583598		9.60702	7.49761	FJ-G1	N=10
FJ-G1@09		2023-04-21	15:10:00	1.89337	2637685000	0.48524	5339447	0.480679	0.0020243	0.00609632		9.52573	7.41649	AVE	9.61821	7.50878
FJ-G1@10		2023-04-21	15:16:00	1.89017	2630332000	0.487395	5323748	0.483574	0.00202399	0.00750767		9.37114	7.26222	2SD	0.301306	0.300677
FJ-G2@01		2023-04-21	15:27:00	1.88532	2634407000	0.487527	5333093	0.483425	0.00202441	0.00599331		9.5786	7.46925
FJ-G2@02		2023-04-21	15:32:00	1.88446	2618300000	0.396348	5299940	0.39312	0.0020242	0.00524704		9.47337	7.36424
FJ-G2@03		2023-04-21	15:38:00	1.88665	2621662000	0.492427	5308593	0.489509	0.0020249	0.0055621		9.82545	7.71559
FJ-G2@04		2023-04-21	15:43:00	1.87139	2601895000	0.482288	5271131	0.479877	0.00202589	0.00482114		10.3167	8.20578	FJ-G2	N=6
FJ-G2@05		2023-04-21	15:49:00	1.87006	2583865000	0.437141	5231349	0.434075	0.00202463	0.00523125		9.68831	7.57873	AVE	9.7711	7.66134
FJ-G2@06		2023-04-21	16:00:00	1.86263	2594343000	0.481047	5252858	0.478757	0.00202474	0.00565519		9.74417	7.63447	2SD	0.589162	0.587931
FJ-G3@01		2023-04-21	16:06:00	1.86138	2593545000	0.48661	5253095	0.483056	0.00202546	0.00605819		10.1022	7.99179
FJ-G3@02		2023-04-21	16:11:00	1.86028	2582549000	0.474068	5229635	0.469857	0.002025	0.006963		9.87283	7.76287
FJ-G3@03		2023-04-21	16:17:00	1.85762	2578309000	0.483149	5222080	0.478411	0.0020254	0.00729187		10.0728	7.96243
FJ-G3@04		2023-04-21	16:22:00	1.85864	2576208000	0.481874	5216467	0.477162	0.00202487	0.00599498		9.80999	7.70016	FJ-G3	N=6
FJ-G3@05		2023-04-21	16:33:00	1.85543	2579112000	0.47348	5221945	0.470114	0.00202471	0.00723897		9.7307	7.62103	AVE	9.90275	7.79273
FJ-G3@06		2023-04-21	16:39:00	1.85238	2562211000	0.461941	5188223	0.45848	0.00202491	0.00823075		9.82795	7.71808	2SD	0.301211	0.300582
FJ-G4@01		2023-04-21	16:44:00	1.85402	2590084000	0.489954	5244028	0.486041	0.00202466	0.00606396		9.70626	7.59665
FJ-G4@02		2023-04-21	16:50:00	1.85598	2577801000	0.495009	5218164	0.489967	0.00202428	0.00718576		9.51476	7.40554	FJ-G4	N=4
FJ-G4@03		2023-04-21	16:55:00	1.85035	2581699000	0.479611	5227384	0.476154	0.00202479	0.0057544		9.7701	7.66035	AVE	9.67135	7.56181
FJ-G4@04		2023-04-21	17:07:00	1.84659	2564898000	0.456884	5192973	0.45233	0.00202464	0.0069727		9.69429	7.5847	2SD	0.219139	0.218681
FJ-G5@01		2023-04-21	17:12:00	1.8426	2563941000	0.475952	5192425	0.471601	0.00202518	0.00610179		9.96459	7.85444
FJ-G5@02		2023-04-21	17:18:00	1.84518	2561315000	0.471786	5187348	0.466584	0.00202528	0.00790844		10.0125	7.90221
FJ-G5@03		2023-04-21	17:23:00	1.84471	2563475000	0.464504	5190547	0.46239	0.00202481	0.00477656		9.78107	7.6713	FJ-G5	N=5
FJ-G5@04		2023-04-21	17:29:00	1.84456	2567849000	0.467876	5199191	0.462763	0.00202474	0.00650478		9.74217	7.63248	AVE	9.86266	7.75271
FJ-G5@05		2023-04-21	17:40:00	1.84409	2561516000	0.46196	5186748	0.460153	0.00202488	0.00573449		9.81299	7.70315	2SD	0.237644	0.237148
FJ-G6@01		2023-04-21	17:45:00	1.834	2558905000	0.476223	5180211	0.471245	0.0020244	0.00635319		9.57261	7.46327
FJ-G6@02		2023-04-21	17:51:00	1.82336	2536461000	0.457236	5134297	0.453002	0.0020242	0.00634199		9.47786	7.36872	FJ-G6	N=4
FJ-G6@03		2023-04-21	17:56:00	1.81561	2517009000	0.456286	5094675	0.451851	0.00202411	0.00619273		9.42898	7.31995	AVE	9.48696	7.3778
FJ-G6@04		2023-04-21	18:02:00	1.81373	2500146000	0.433515	5060753	0.43137	0.00202419	0.00586416		9.46838	7.35926	2SD	0.121794	0.121539
FJ-G7@01		2023-04-21	18:13:00	1.81381	2509340000	0.466938	5080296	0.460865	0.00202457	0.00725883		9.65789	7.54837
FJ-G7@02		2023-04-21	18:19:00	1.81608	2515501000	0.472111	5092918	0.468024	0.00202462	0.00731634		9.68532	7.57575
FJ-G7@03		2023-04-21	18:24:00	1.81694	2517735000	0.462715	5097743	0.458478	0.00202474	0.00539106		9.74516	7.63546
FJ-G7@04		2023-04-21	18:30:00	1.8189	2521318000	0.463936	5103645	0.459557	0.0020242	0.00628623		9.47786	7.36872	FJ-G7	N=6
FJ-G7@05		2023-04-21	18:35:00	1.82062	2510036000	0.908713	5080565	0.908158	0.0020241	0.00500849		9.42599	7.31696	AVE	9.58159	7.47223
FJ-G7@06		2023-04-21	18:46:00	1.81882	2515275000	0.445153	5091520	0.442427	0.00202424	0.00570968		9.49731	7.38813	2SD	0.261399	0.260853
FJ-G8@01		2023-04-21	18:52:00	1.82578	2543271000	0.489671	5149768	0.48793	0.00202486	0.00479526		9.806	7.69618
FJ-G8@02		2023-04-21	18:57:00	1.83478	2547160000	0.487935	5161131	0.485554	0.00202623	0.00534541		10.4897	8.37847
FJ-G8@03		2023-04-21	19:03:00	1.83908	2552511000	0.478941	5167261	0.476802	0.00202439	0.00478721		9.56862	7.45929	FJ-G8	N=5
FJ-G8@04		2023-04-21	19:08:00	1.84393	2558951000	0.49891	5182218	0.495814	0.00202514	0.00750543		9.94415	7.83403	AVE	9.98803	7.87783
FJ-G8@05		2023-04-21	19:19:00	1.83971	2548336000	0.455343	5161682	0.452427	0.00202552	0.00491421		10.1317	8.02115	2SD	0.695191	0.693739
FJ-G9@01		2023-04-21	19:25:00	1.84143	2574002000	0.496836	5211009	0.492866	0.00202448	0.00740545		9.61749	7.50806
FJ-G9@02		2023-04-21	19:31:00	1.83462	2561849000	0.471854	5185338	0.468671	0.00202407	0.00544676		9.40904	7.30004	FJ-G9	N=4
FJ-G9@03		2023-04-21	19:36:00	1.82508	2543528000	0.453688	5149525	0.452114	0.00202456	0.00490585		9.65639	7.54688	AVE	9.56114	7.45183
FJ-G9@04		2023-04-21	19:42:00	1.82171	2539162000	0.465903	5140198	0.462799	0.00202437	0.00479967		9.56164	7.45232	2SD	0.217209	0.216755
FJ-G10@01		2023-04-21	19:53:00	1.81373	2523969000	0.472222	5110726	0.469374	0.00202488	0.00543987		9.81548	7.70563
FJ-G10@02		2023-04-21	19:58:00	1.81561	2520248000	0.45701	5103497	0.453842	0.002025	0.00496254		9.87632	7.76635
FJ-G10@03		2023-04-21	20:04:00	1.81647	2530091000	0.470525	5122546	0.464687	0.00202466	0.00655589		9.70427	7.59466
FJ-G10@04		2023-04-21	20:09:00	1.82164	2531747000	0.466435	5126179	0.463049	0.00202477	0.00661163		9.75763	7.64791	FJ-G10	N=6
FJ-G10@05		2023-04-21	20:15:00	1.8214	2536730000	0.466174	5136507	0.4634	0.00202486	0.00684334		9.80351	7.69369	AVE	9.78373	7.67395
FJ-G10@06		2023-04-21	20:26:00	1.81819	2521655000	0.458284	5105683	0.455149	0.00202474	0.00484749		9.74516	7.63546	2SD	0.121508	0.121254
FJ-G11@01		2023-04-21	20:31:00	1.82343	2548957000	0.479457	5162032	0.474759	0.00202516	0.00755028		9.95562	7.84548
FJ-G11@02		2023-04-21	20:37:00	1.82719	2553138000	0.459532	5171628	0.458418	0.0020256	0.00785748		10.1731	8.06246	FJ-G11	N=4
FJ-G11@03		2023-04-21	20:42:00	1.82015	2543038000	0.466905	5152012	0.464296	0.00202593	0.00510832		10.3396	8.22868	AVE	10.1906	8.08
FJ-G11@04		2023-04-21	20:48:00	1.80568	2510378000	0.447987	5085623	0.446556	0.00202584	0.00482511		10.2942	8.18339	2SD	0.343457	0.342739
FJ-G12@01		2023-04-21	20:59:00	1.81225	2532769000	0.467393	5127063	0.465509	0.0020243	0.00480576		9.52274	7.41351
FJ-G12@02		2023-04-21	21:05:00	1.81045	2519587000	0.447346	5102202	0.444223	0.00202502	0.0051653		9.8848	7.77481
FJ-G12@03		2023-04-21	21:10:00	1.80865	2509223000	0.452351	5080928	0.449024	0.00202491	0.00618424		9.82795	7.71808	FJ-G12	N=5
FJ-G12@04		2023-04-21	21:16:00	1.80599	2511156000	0.462657	5085123	0.459187	0.00202502	0.00721029		9.8838	7.77381	AVE	9.78077	7.671
FJ-G12@05		2023-04-21	21:21:00	1.79778	2497475000	0.370331	5056926	0.366986	0.00202482	0.00645268		9.78456	7.67478	2SD	0.300428	0.2998
FJ-G13@001		2023-04-21	22:56:00	1.80951	2529212000	0.466184	5120807	0.464328	0.00202467	0.00740148		9.70926	7.57423
FJ-G13@002		2023-04-21	23:02:00	1.79754	2558461000	0.487763	5179822	0.484988	0.00202459	0.00736237		9.66986	7.53491
FJ-G13@003		2023-04-21	23:07:00	1.79457	2497242000	0.440676	5056336	0.437299	0.00202477	0.00545189		9.76112	7.62598
FJ-G13@004		2023-04-21	23:13:00	1.77157	2451364000	0.458535	4961577	0.453899	0.00202402	0.00705378		9.3831	7.24877
FJ-G13@005		2023-04-21	23:18:00	1.76922	2454231000	0.437028	4968034	0.433341	0.00202428	0.00678504		9.51476	7.38015
FJ-G13@006		2023-04-21	23:29:00	1.76797	2448521000	0.42788	4957441	0.425006	0.00202467	0.00501206		9.71075	7.57572
FJ-G13@007		2023-04-21	23:35:00	1.75991	2441215000	0.429724	4941835	0.424738	0.00202434	0.00652141		9.54618	7.4115
FJ-G13@008		2023-04-21	23:40:00	1.75295	2426837000	0.432268	4913081	0.428383	0.00202449	0.00711863		9.61799	7.48316
FJ-G13@009		2023-04-21	23:46:00	1.74833	2423368000	0.424296	4905726	0.421068	0.00202435	0.00642409		9.54917	7.41448
FJ-G13@010		2023-04-21	23:51:00	1.75201	2428808000	0.444893	4916567	0.442055	0.00202428	0.00677144		9.51376	7.37915
FJ-G13@011		2023-04-22	00:03:00	1.76554	2444019000	0.449991	4947119	0.44868	0.00202418	0.00489152		9.4634	7.32889
FJ-G13@012		2023-04-22	00:08:00	1.76961	2450498000	0.464645	4961724	0.460071	0.00202479	0.00625285		9.7696	7.63444	FJ-G13	N=14
FJ-G13@013		2023-04-22	00:14:00	1.76022	2444347000	0.438851	4949519	0.434292	0.00202489	0.0073353		9.81997	7.68471	AVE	9.6363	7.50143
FJ-G13@014		2023-04-22	00:19:00	1.75091	2433163000	0.435598	4927166	0.432167	0.00202501	0.00541752		9.87931	7.74393	2SD	0.292453	0.291835
FJ-G14@001		2023-04-22	00:25:00	1.74325	2427398000	0.423007	4914565	0.420636	0.00202463	0.00805337		9.68831	7.55333
FJ-G14@002		2023-04-22	00:36:00	1.72893	2481396000	0.412805	5022551	0.408993	0.00202409	0.00656874		9.42001	7.28559
FJ-G14@003		2023-04-22	00:41:00	1.72744	2418166000	0.453033	4895108	0.450798	0.00202431	0.0053258		9.53022	7.39557
FJ-G14@004		2023-04-22	00:47:00	1.72604	2413467000	0.438993	4886639	0.432713	0.00202475	0.00847027		9.74915	7.61404
FJ-G14@005		2023-04-22	00:52:00	1.72768	2405535000	0.42881	4870110	0.42497	0.00202455	0.00586145		9.64991	7.51501
FJ-G14@006		2023-04-22	00:58:00	1.72525	2398482000	0.426478	4858415	0.423129	0.00202563	0.00634625		10.1865	8.05048
FJ-G14@007		2023-04-22	01:09:00	1.75545	2426948000	0.488121	4915602	0.486145	0.00202543	0.006438		10.0883	7.95244
FJ-G14@008		2023-04-22	01:15:00	1.76069	2444383000	0.458773	4950448	0.455893	0.00202524	0.00650472		9.99352	7.85789
FJ-G14@009		2023-04-22	01:20:00	1.75733	2441562000	0.4419	4945285	0.439285	0.00202546	0.00627031		10.1057	7.96986
FJ-G14@010		2023-04-22	01:26:00	1.75905	2441175000	0.441427	4944068	0.437764	0.00202529	0.00695779		10.018	7.88227
FJ-G14@011		2023-04-22	01:31:00	1.76547	2448949000	0.44714	4959181	0.446777	0.00202503	0.00588133		9.88679	7.75139
FJ-G14@012		2023-04-22	01:42:00	1.75334	2426443000	0.416994	4912361	0.412058	0.00202452	0.00844686		9.63445	7.49958
FJ-G14@013		2023-04-22	01:48:00	1.74301	2414708000	0.416477	4889952	0.414401	0.00202507	0.00519605		9.91073	7.77528
FJ-G14@014		2023-04-22	01:53:00	1.7366	2400292000	0.442117	4860580	0.439668	0.002025	0.00570573		9.87383	7.73845	FJ-G14	N=16
FJ-G14@015		2023-04-22	01:59:00	1.74012	2405589000	0.44136	4869879	0.439013	0.00202441	0.00559167		9.5781	7.44335	AVE	9.81327	7.67802
FJ-G14@016		2023-04-22	02:04:00	1.73988	2403983000	0.416092	4867207	0.412738	0.00202465	0.00650199		9.69878	7.56378	2SD	0.454605	0.453644
FJ-G15@001		2023-04-22	02:15:00	1.74027	2431091000	0.441499	4924511	0.440548	0.00202564	0.00490262		10.1935	8.05745
FJ-G15@002		2023-04-22	02:21:00	1.7434	2429440000	0.444738	4918868	0.443792	0.00202469	0.00531413		9.72172	7.58667
FJ-G15@003		2023-04-22	02:27:00	1.74857	2425348000	0.449115	4910046	0.446228	0.00202448	0.00577323		9.61301	7.47818
FJ-G15@004		2023-04-22	02:32:00	1.74904	2430076000	0.442096	4919688	0.439331	0.0020245	0.00666981		9.62697	7.49212
FJ-G15@005		2023-04-22	02:38:00	1.75569	2447161000	0.44736	4958863	0.445936	0.00202638	0.00592026		10.5605	8.42371	FJ-G15	N=7
FJ-G15@006		2023-04-22	02:49:00	1.76195	2448387000	0.430348	4956923	0.425824	0.00202457	0.00658866		9.66188	7.52695	AVE	9.84968	7.71435
FJ-G15@007		2023-04-22	02:54:00	1.76586	2444708000	0.444423	4949022	0.439488	0.00202439	0.00684122		9.57012	7.43538	2SD	0.756724	0.755124
FJ-G16@001		2023-04-22	03:00:00	1.7682	2463370000	0.441091	4985681	0.43763	0.00202393	0.00607125		9.34221	7.20796
FJ-G16@002		2023-04-22	03:05:00	1.77462	2462919000	0.469707	4985526	0.465617	0.00202424	0.00614425		9.49631	7.36173
FJ-G16@003		2023-04-22	03:11:00	1.76985	2498345000	0.41331	5057407	0.412311	0.00202431	0.00483842		9.52773	7.39308
FJ-G16@004		2023-04-22	03:22:00	1.76656	2456657000	0.415828	4974193	0.409493	0.00202479	0.00928449		9.7706	7.63544
FJ-G16@005		2023-04-22	03:27:00	1.76625	2487902000	0.433438	5036480	0.430541	0.00202439	0.00526459		9.57161	7.43688
FJ-G16@006		2023-04-22	03:33:00	1.76719	2549261000	0.391849	5158814	0.390073	0.00202365	0.00561402		9.20257	7.06862	FJ-G16	N=8
FJ-G16@007		2023-04-22	03:38:00	1.7668	2440693000	0.458513	4941884	0.453262	0.0020248	0.00835958		9.77259	7.63743	AVE	9.54462	7.40994
FJ-G16@008		2023-04-22	03:44:00	1.76593	2446222000	0.457931	4952602	0.455145	0.0020246	0.00652347		9.67335	7.5384	2SD	0.400657	0.39981
														FJ	M=16	N=110
														AVE	7.63661	7.62131
														2SD	0.373564	0.493158

## Sheet: Table S6
Table S6 ANOVA table for homogeneity study of δ18O in NJU-Ba-1 and FJ barite
		NJU-Ba-1	FJ
	m	21	16
	N	86	109
	Q1	1.29993	2.78156
	Q2	1.76249	3.81051
	Mbetween	0.0649965	0.185437
	Mwithin	0.0271153	0.0409732
	2sbetween	0.193232	0.293712
	2swithin	0.329334	0.404837
	The formula used in the calculation:
	xij, measurement j in group i; x ̅i is mean value of group i measurement; x ̿, mean value of all measurements; m, the number of groups; N is the number of all measurements; ni, number of group i measurement, Q1 the between-group square; Q2, the within-group square; v1, degree of freedom between group; v2, degree of freedom within group; Mbetween, the between-group mean square; Mwithin the within-…
